# Supplementary material
Source: MDPI journal article supplement (https://www.mdpi.com/2311-7524/10/2/190)
Supplement: s1 [file s1]

Archive with 2 entries (2 files):
- Supplementary material 2.pdf
- TableS1.xlsx
