# Supplementary material
Source: MDPI journal article supplement (https://www.mdpi.com/2311-7524/10/2/190)
Supplement: s1 [file s1 › Supplementary material 2.pdf]

Supplementary material 2. The PCR gel image of the four S genotypes for the plant material detected.

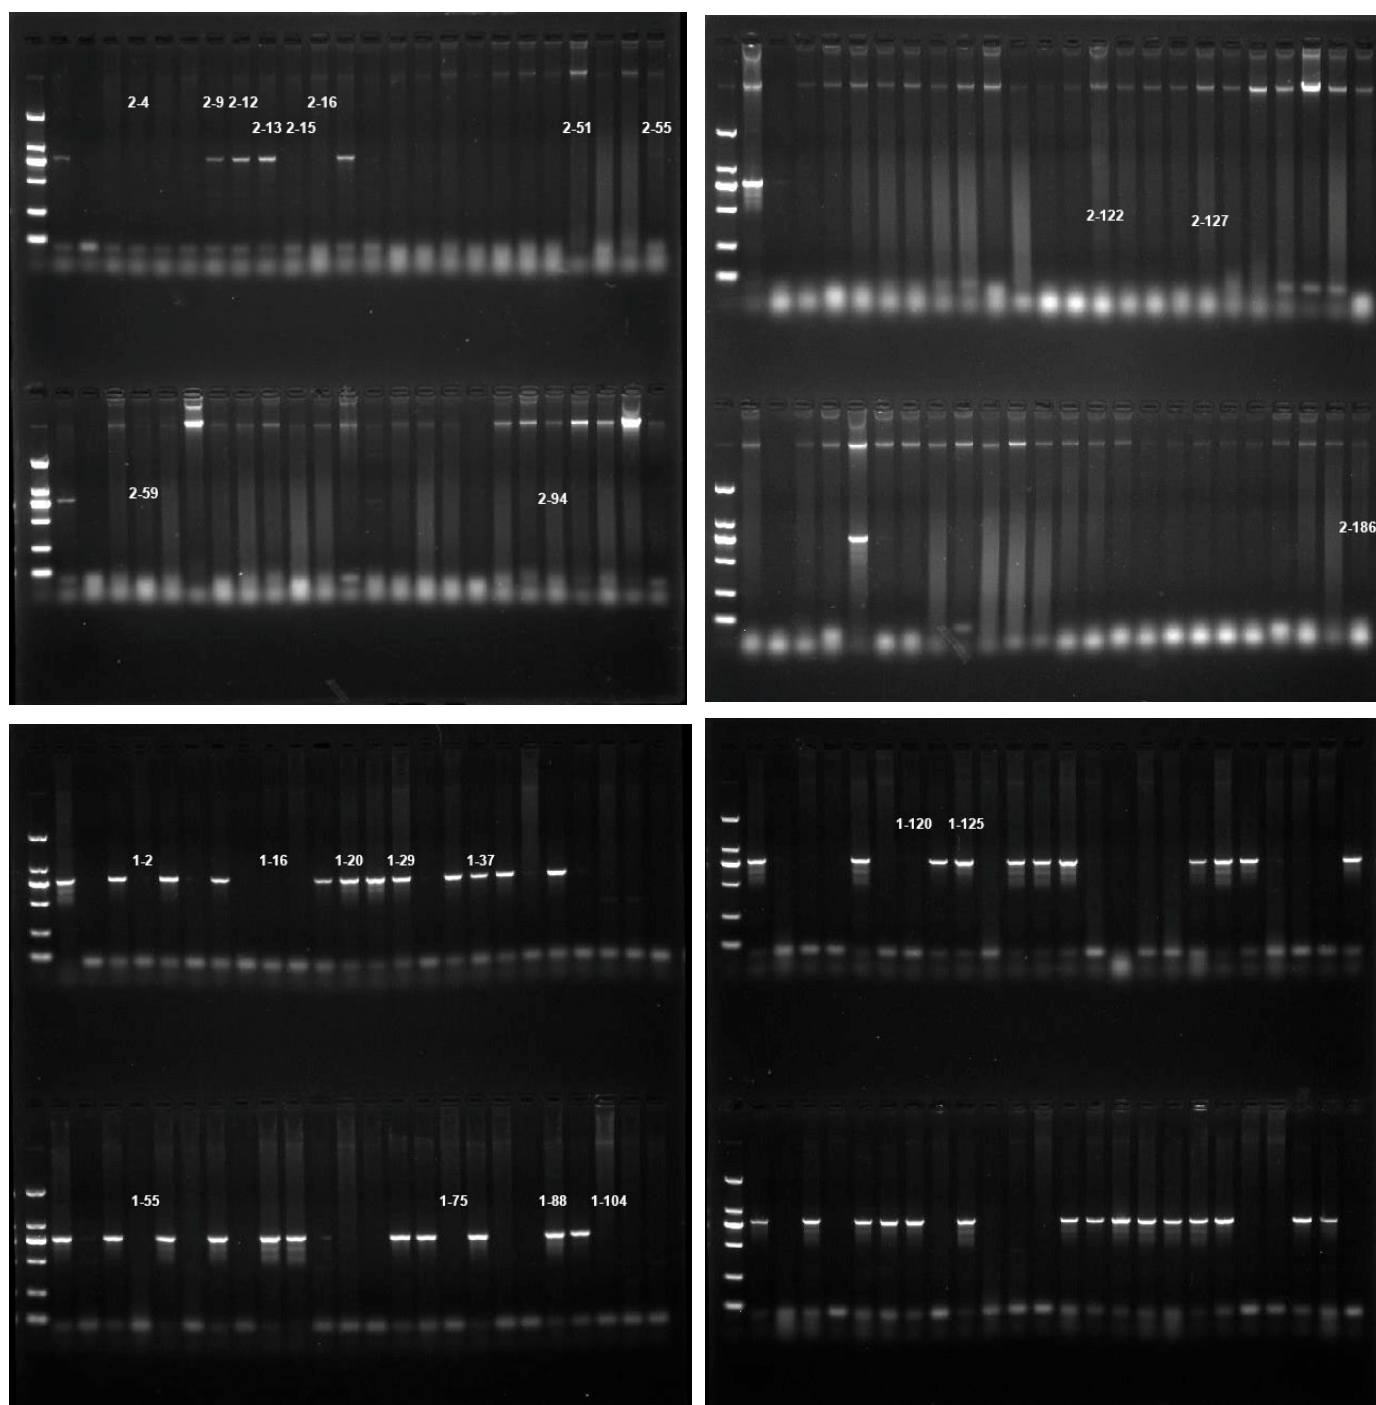

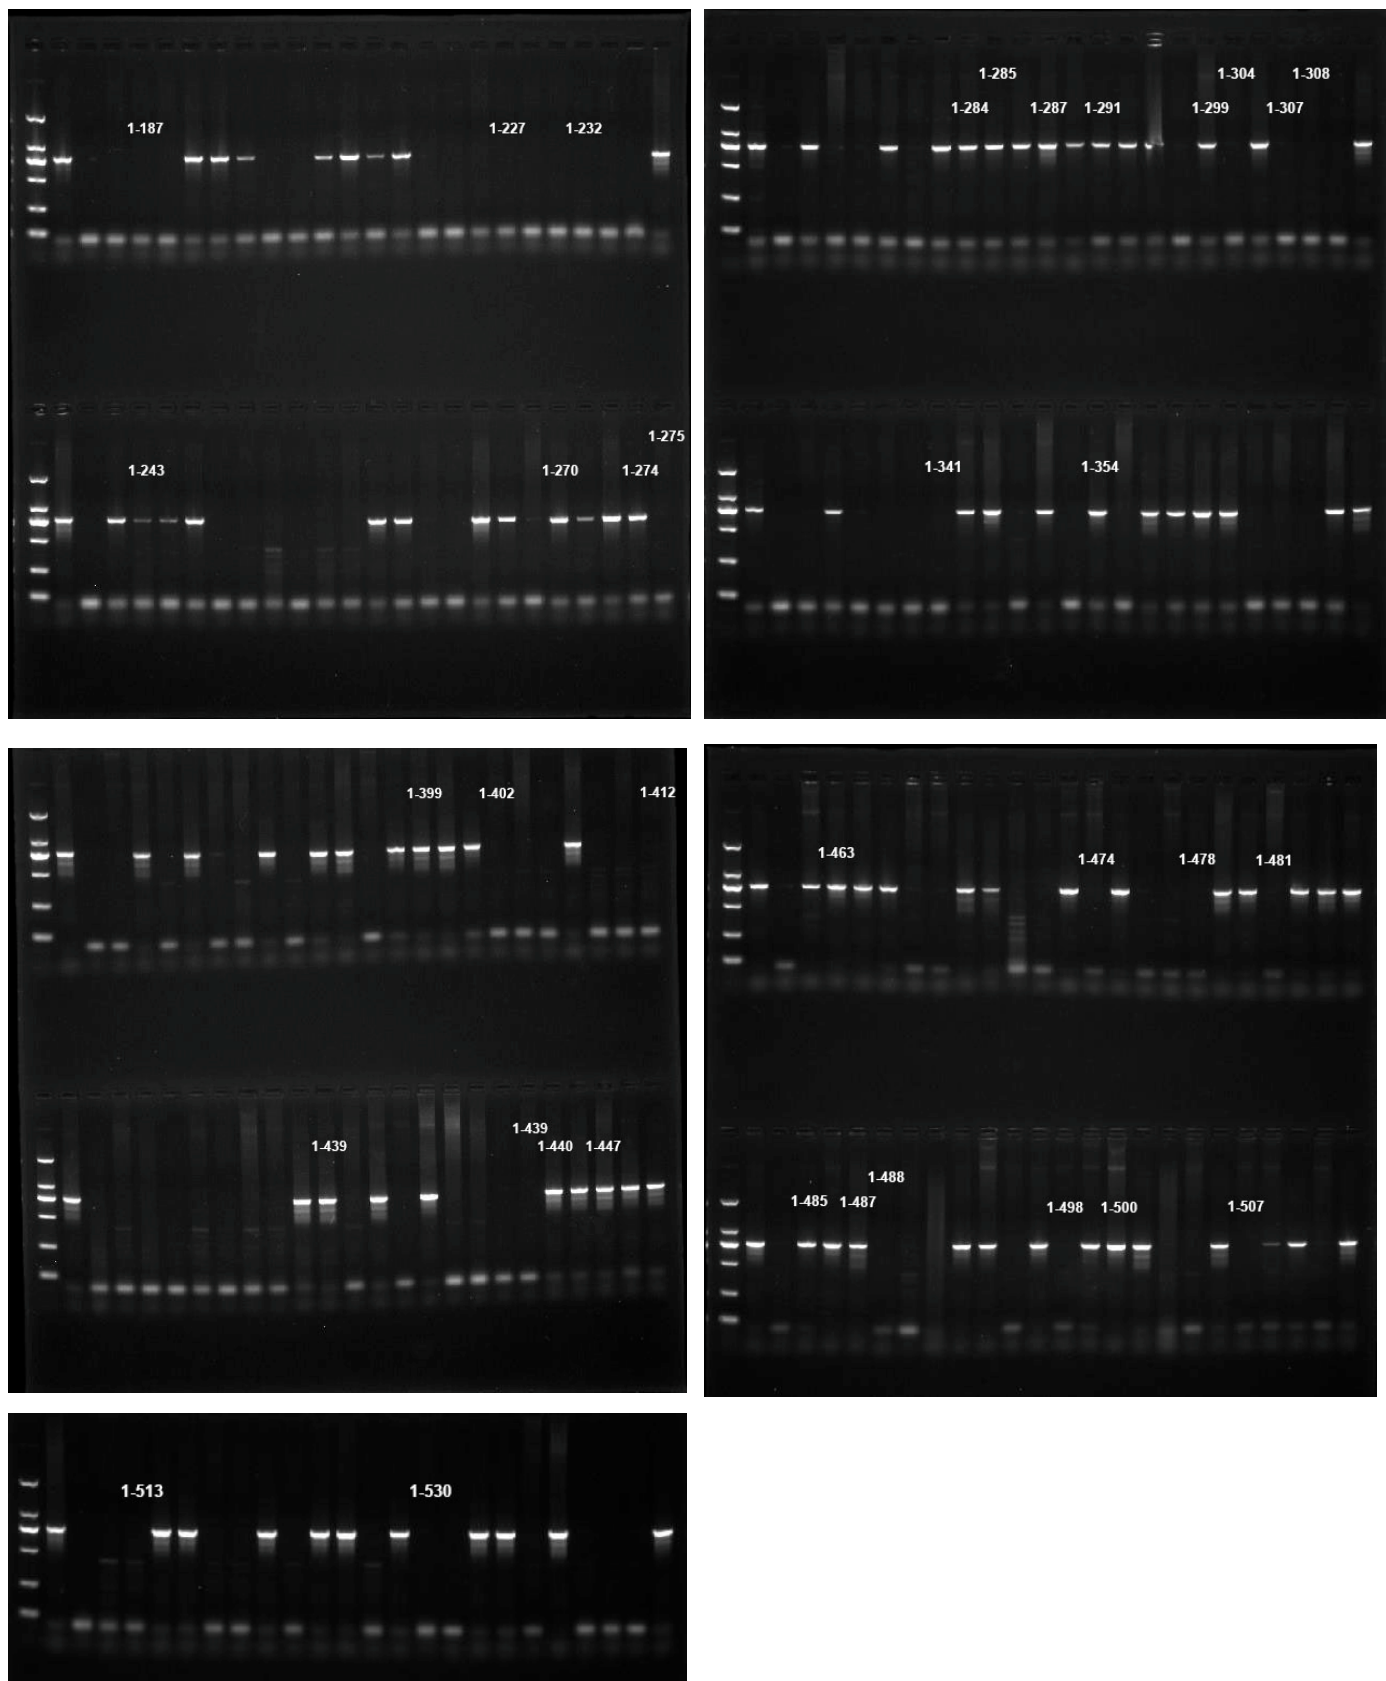

Figure S1 S1-genotype

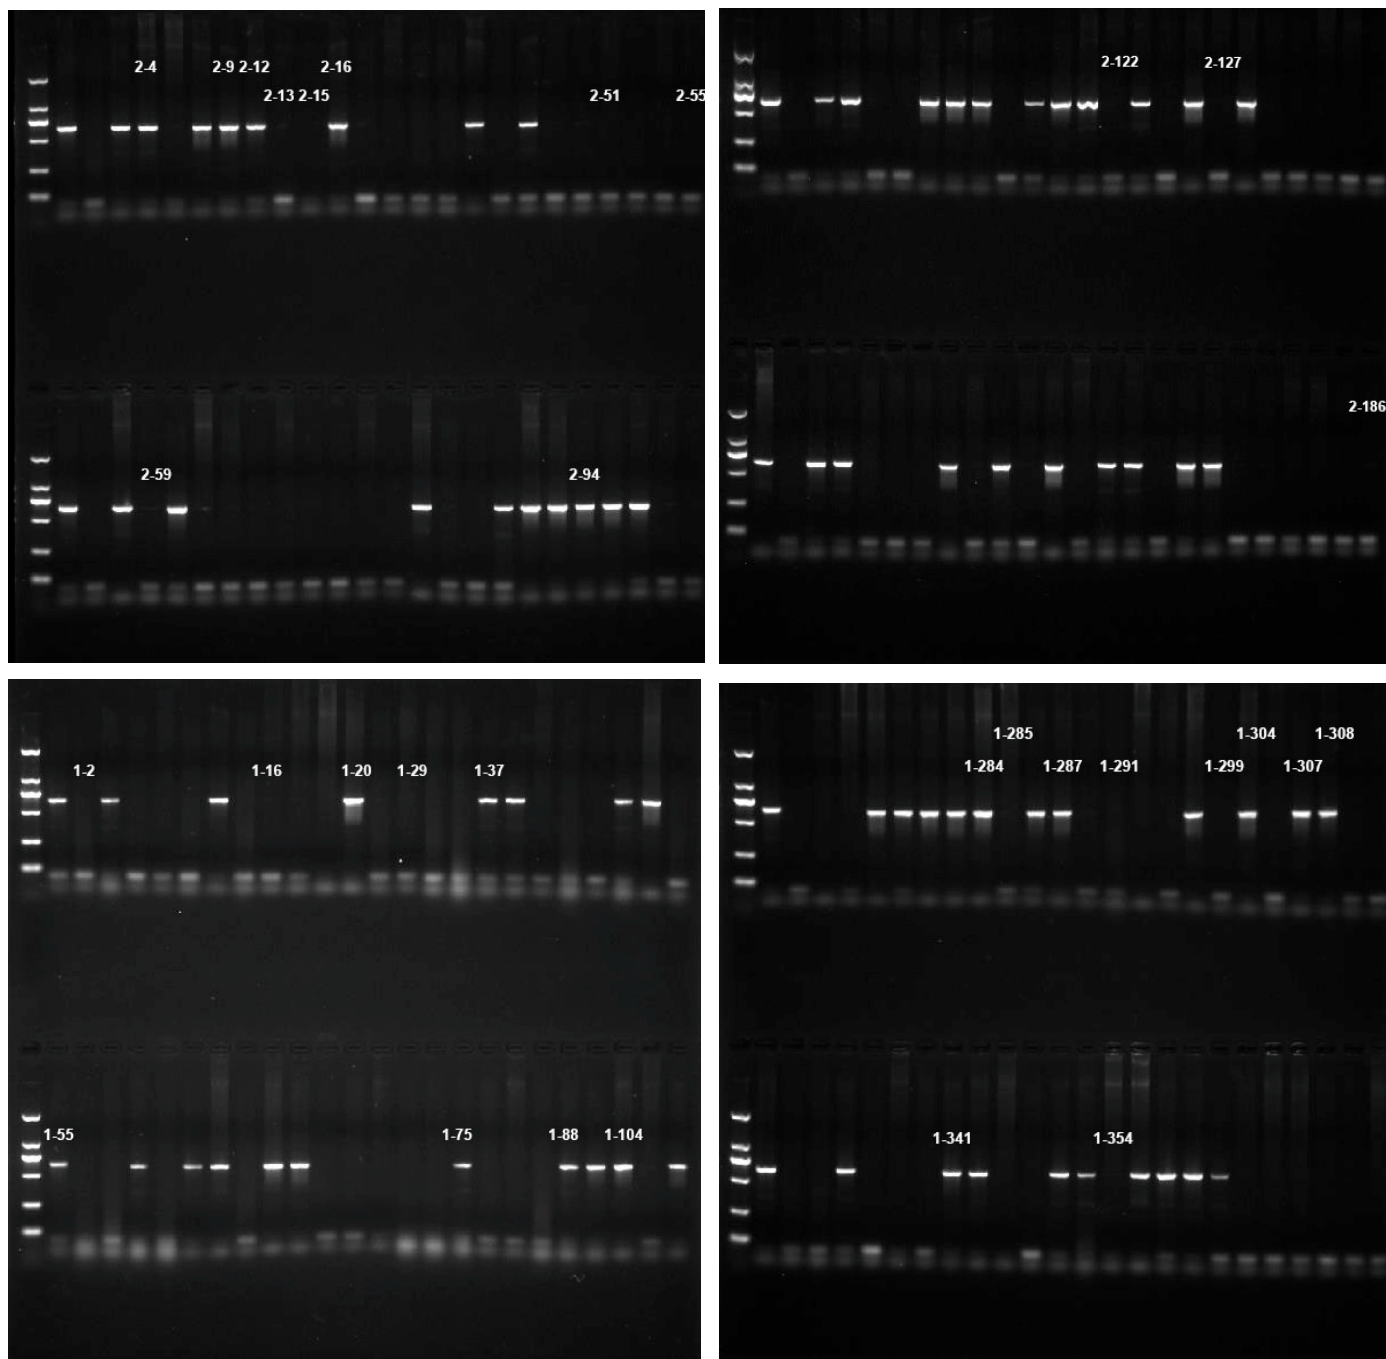

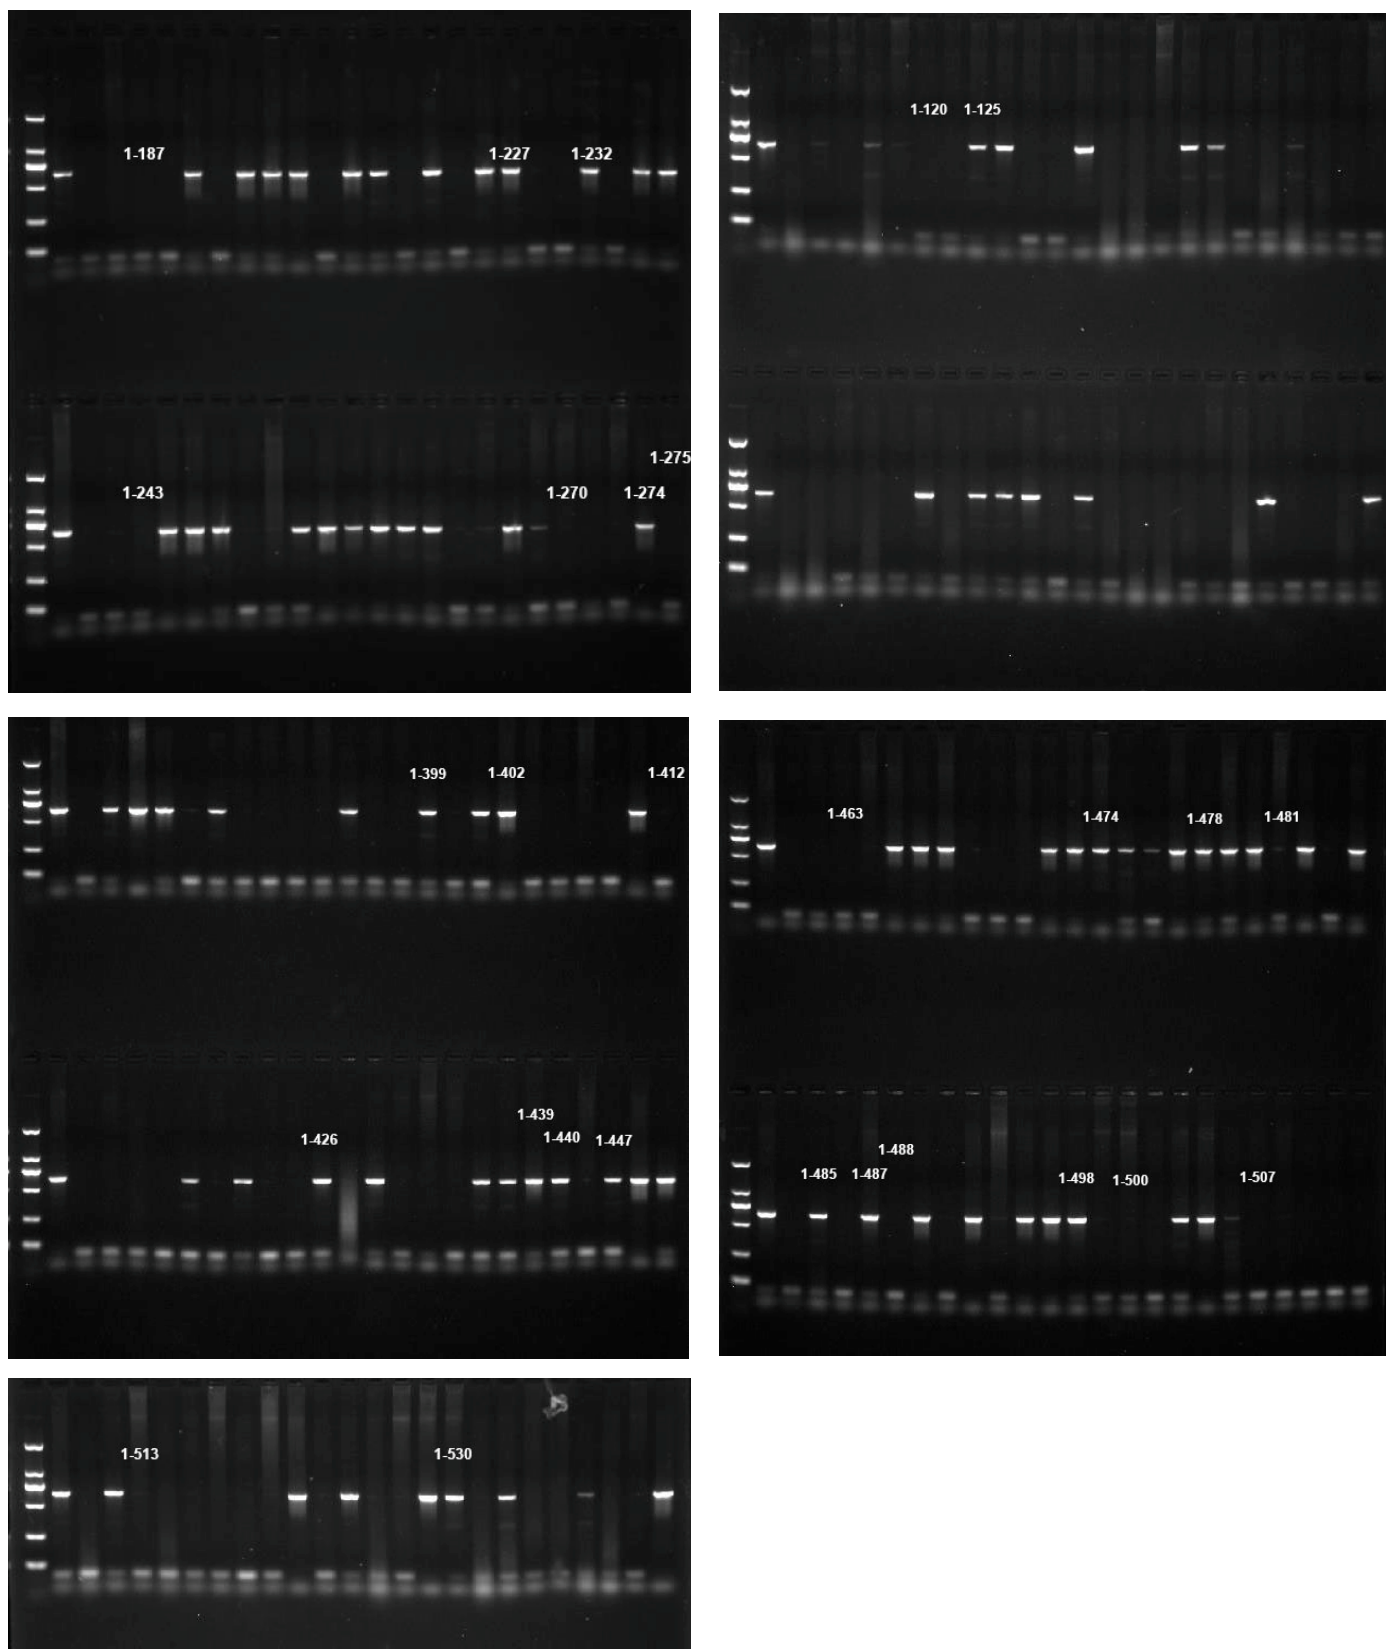

Figure S2 S2-genotype

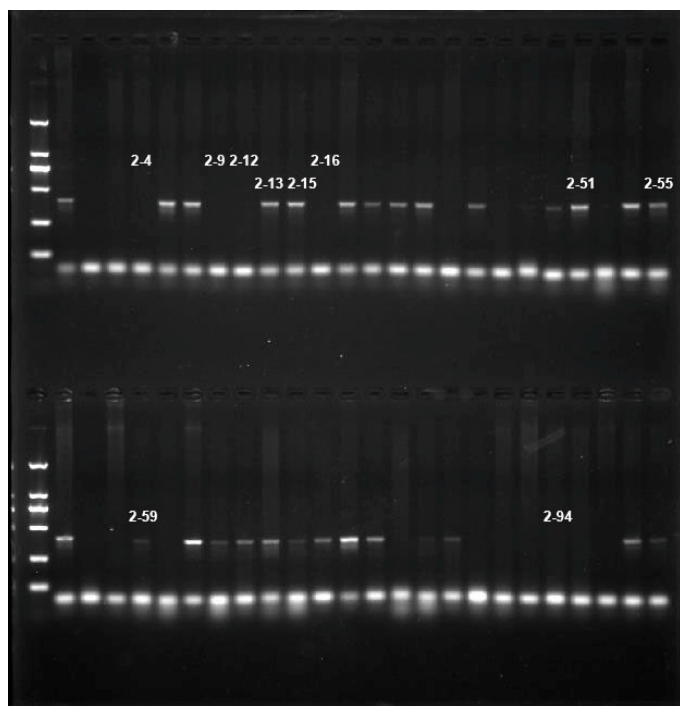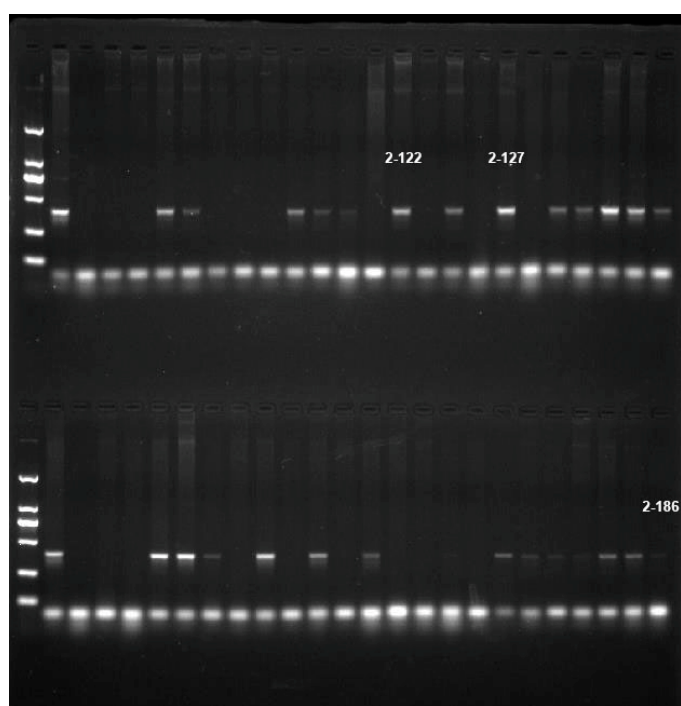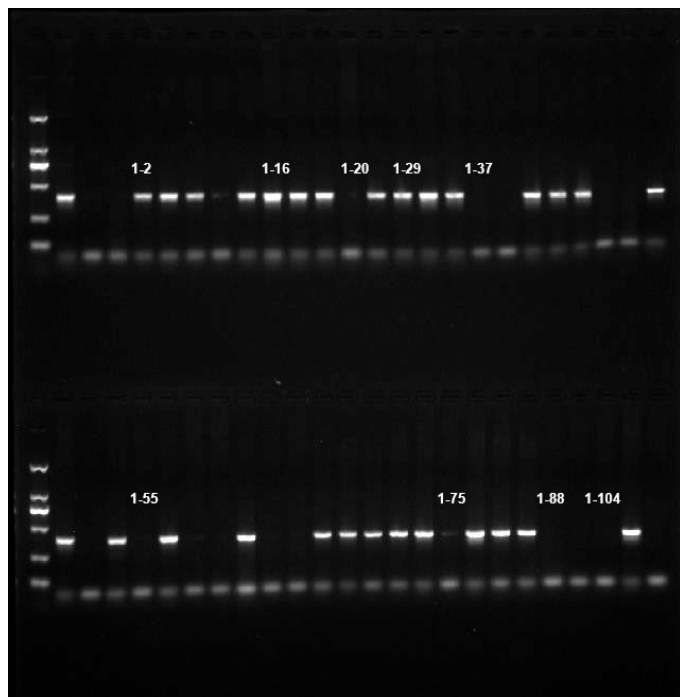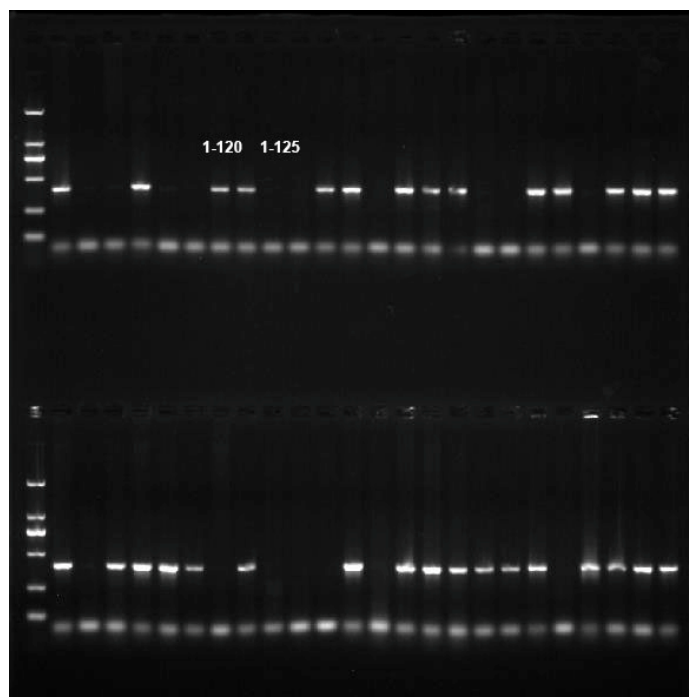

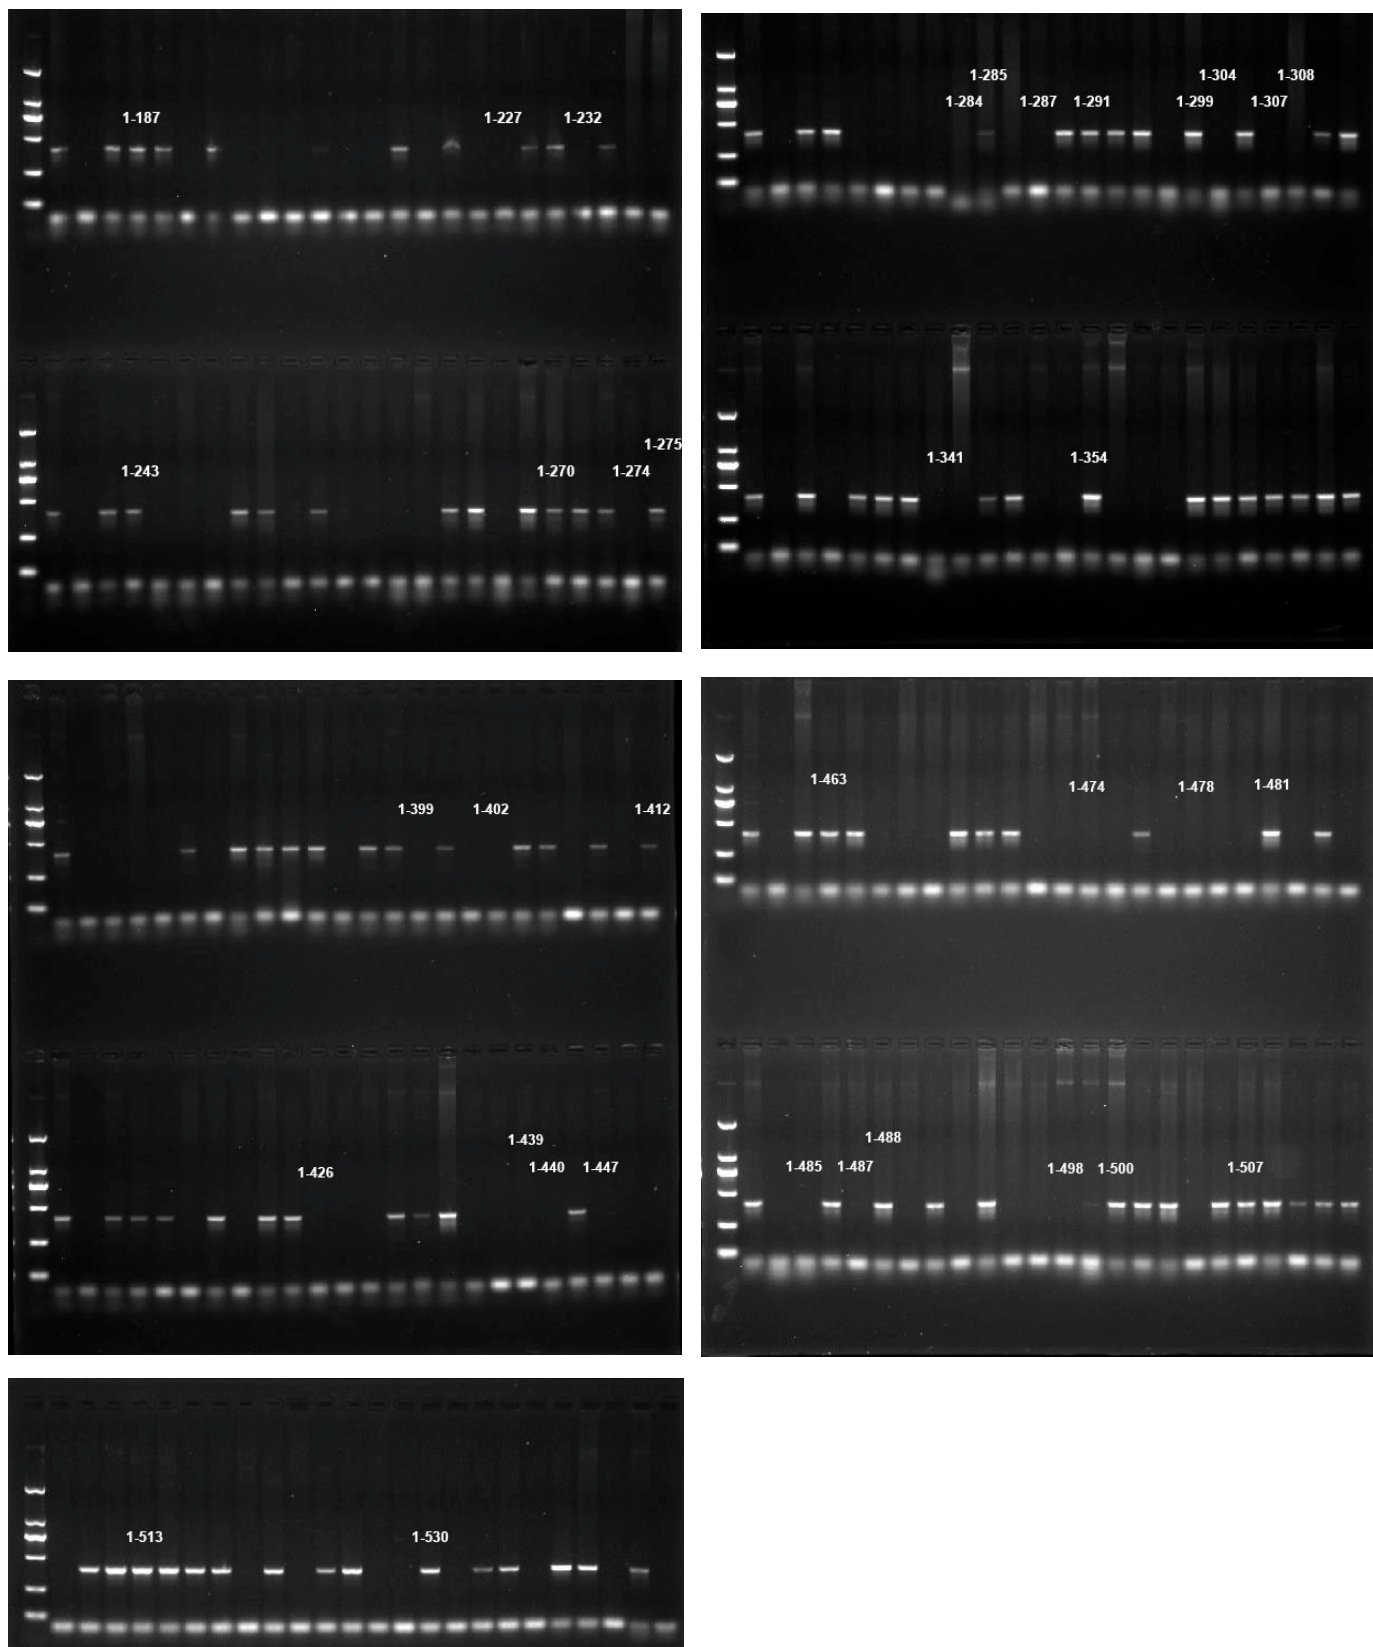

Figure S3 S8-genotype

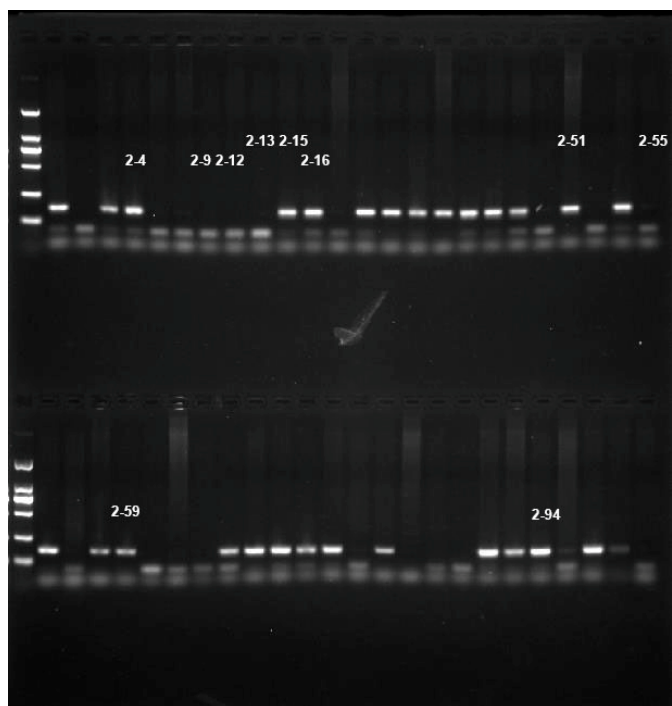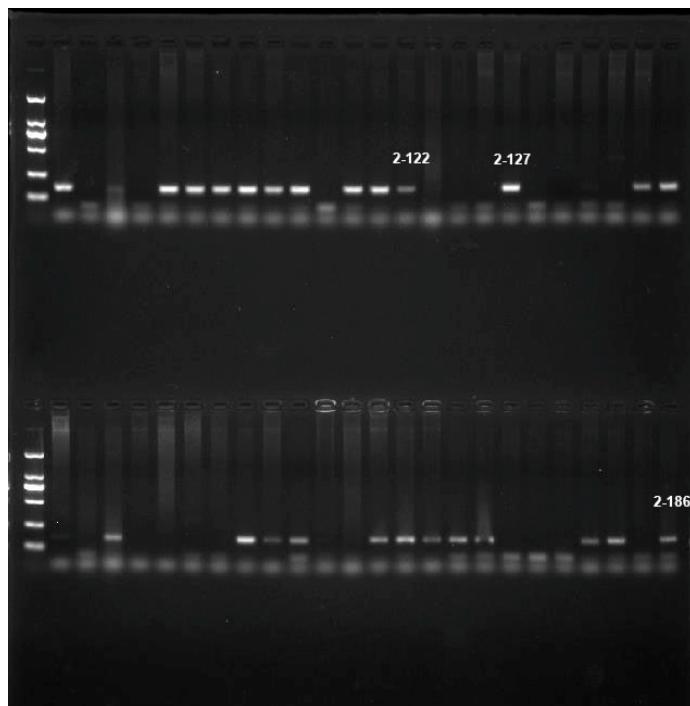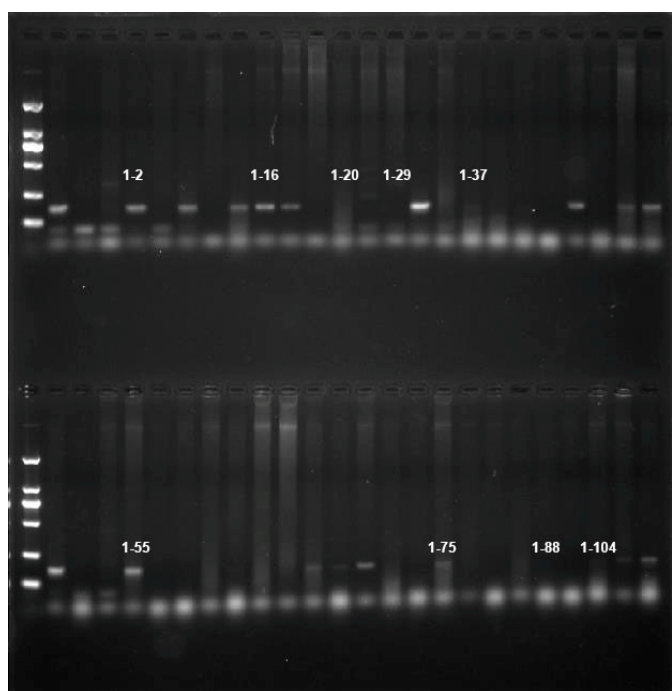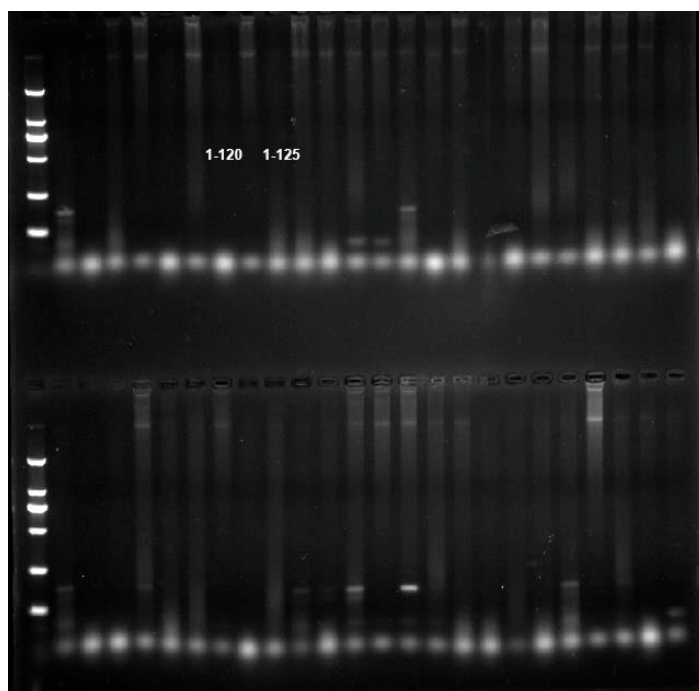

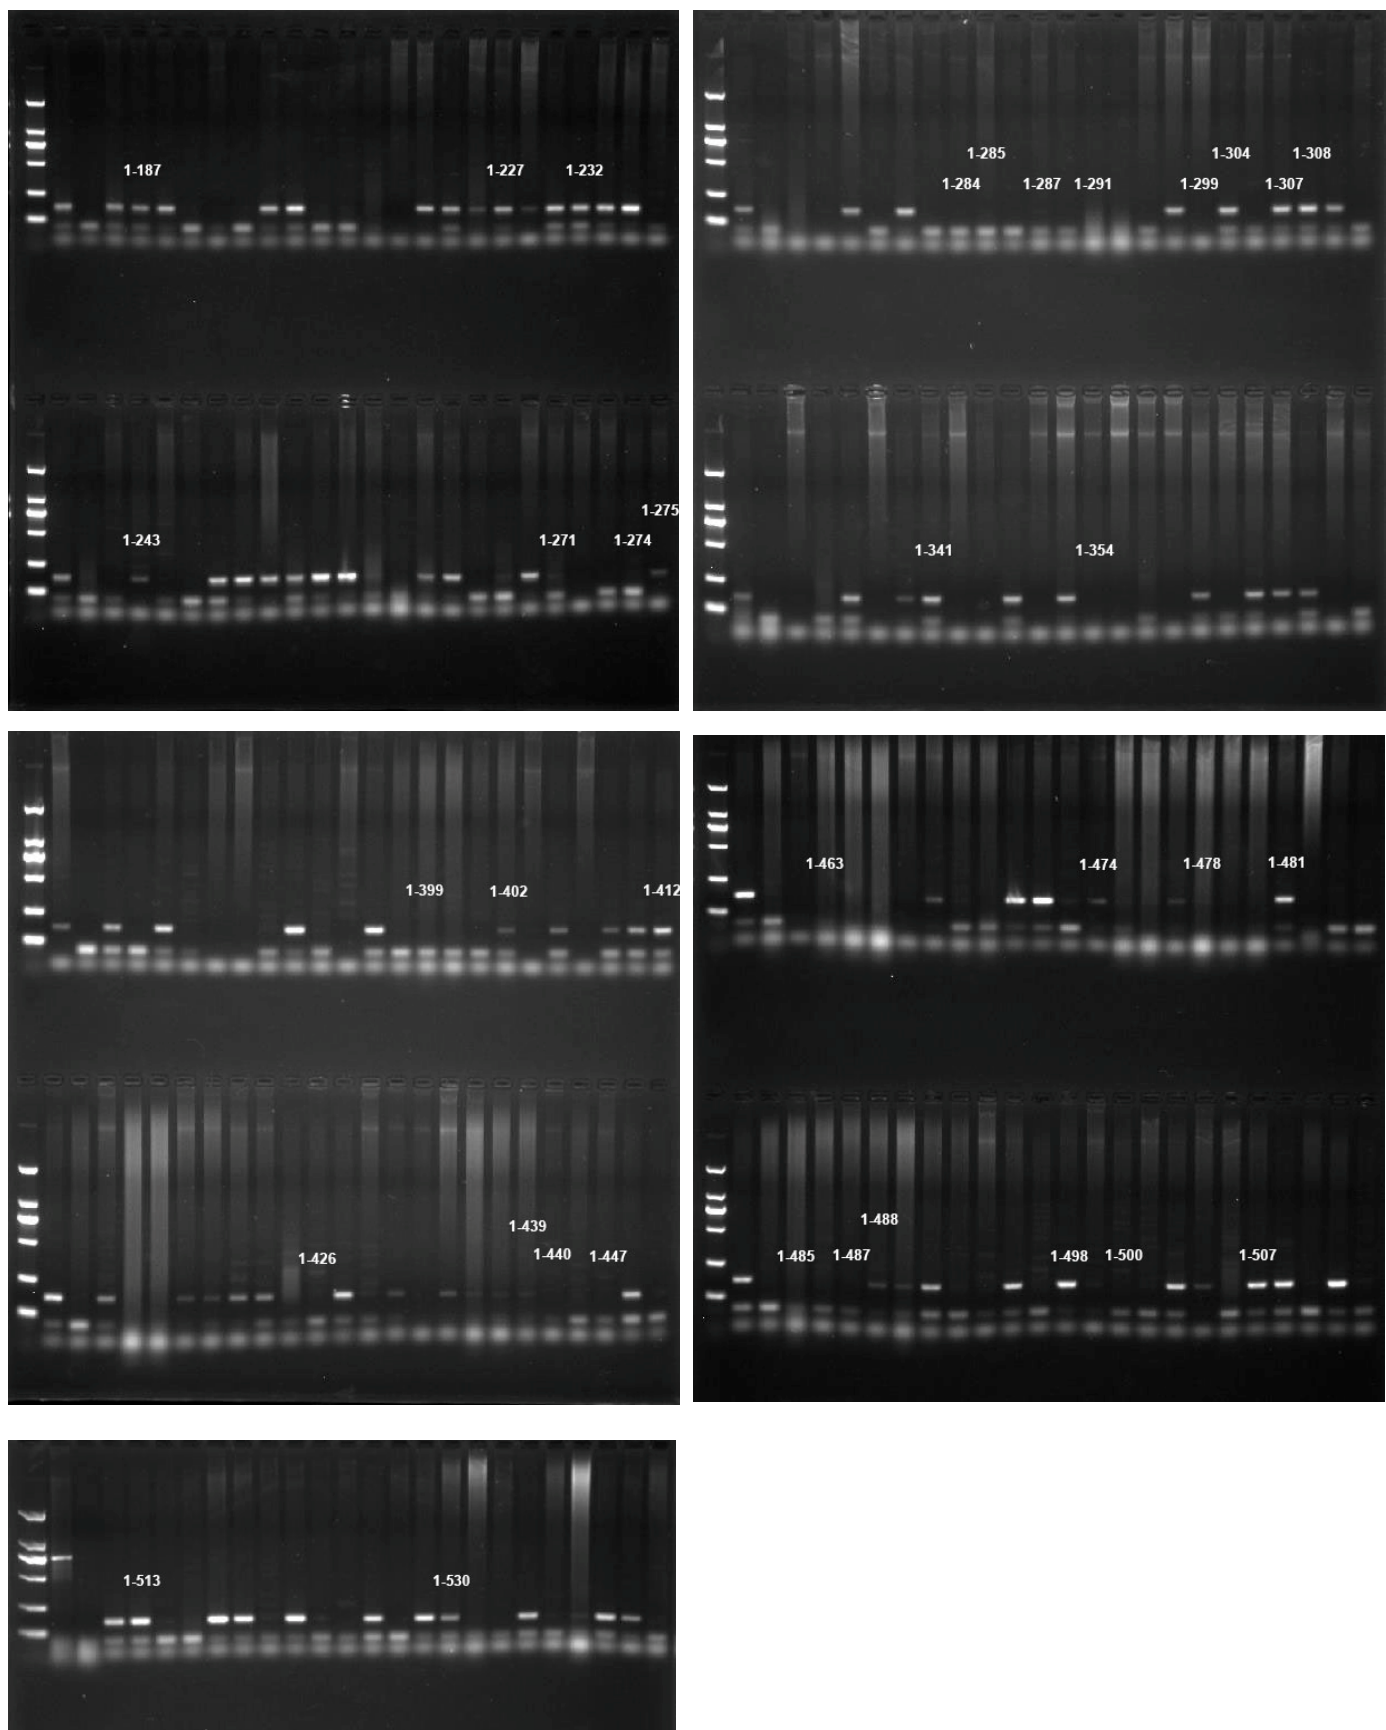

Figure S4 S11-genotype
