# Supplementary material
Source: MDPI journal article supplement (https://www.mdpi.com/2311-7524/10/2/190)
Supplement: s1 [file s1 › TableS1.xlsx]

## Sheet: Sheet1
Table S1: Gene annotation for the variable loci within the candidate regions.
CHROM	POS	REF	ALT	SNPEFF_EFFECT	SNPEFF_GENE_NAME	13_19.GT	13_19.AD	pool1.GT	pool1.AD	pool2.GT	pool2.AD	xin9.GT	xin9.AD	Swissprot
Chr02	24701370	C	T	INTERGENIC	NA	C/C	10,0	C/T	4,2	C/C	60,0	T|T	0,1	NA
Chr02	24701371	T	C	INTERGENIC	NA	T/T	10,0	T/C	6,2	T/T	60,0	C|C	0,1	NA
Chr02	24701407	T	A	INTERGENIC	NA	T/T	10,0	T/A	4,2	T/T	60,0	A|A	0,2	NA
Chr02	24701430	C	T	INTERGENIC	NA	C/C	8,0	C/T	4,2	C/C	56,0	T|T	0,2	NA
Chr02	24701439	G	T	INTERGENIC	NA	G/G	8,0	G/T	4,2	G/G	58,0	T|T	0,3	NA
Chr02	24701494	C	T	INTERGENIC	NA	C/C	4,0	C/T	4,8	C/T	55,5	T/T	0,2	NA
Chr02	24701537	A	G	INTERGENIC	NA	A/A	3,0	A/G	32,6	A/G	67,5	G|G	0,2	NA
Chr02	24701553	T	A	INTERGENIC	NA	T/T	3,0	T/A	5,19	T/A	57,7	A|A	0,3	NA
Chr02	24701572	G	T	INTERGENIC	NA	G/G	3,0	G/T	3,19	G/T	57,7	T|T	0,3	NA
Chr02	24701586	G	A	INTERGENIC	NA	G/G	5,0	G/A	3,19	G/A	53,7	A|A	0,3	NA
Chr02	24701589	A	G	INTERGENIC	NA	A/A	5,0	A/G	3,19	A/G	53,7	G|G	0,2	NA
Chr02	24701636	A	G	INTERGENIC	NA	A/A	3,0	A/G	2,16	A/G	51,13	G/G	0,2	NA
Chr02	24701658	T	C	INTERGENIC	NA	T/T	4,0	T/C	4,6	T/C	54,8	C/C	0,1	NA
Chr02	24701670	T	A	INTERGENIC	NA	T/T	4,0	T/A	4,4	T/A	57,7	A/A	0,1	NA
Chr02	24701686	C	T	INTERGENIC	NA	C/C	4,0	C/T	4,4	C/T	57,7	T|T	0,1	NA
Chr02	24701691	C	A	INTERGENIC	NA	C/C	3,0	C/A	4,4	C/A	59,7	A|A	0,1	NA
Chr02	24702195	G	A	INTERGENIC	NA	G/G	6,0	G/A	2,4	G/A	54,6	A/A	0,2	NA
Chr02	24702316	G	A	INTERGENIC	NA	G/G	1,0	G/A	12,18	G/A	53,5	A/A	0,2	NA
Chr02	24702374	A	G	INTERGENIC	NA	A/A	3,0	A/G	1,29	A/G	52,12	G|G	0,3	NA
Chr02	24702461	T	C	INTERGENIC	NA	T/T	4,0	T/C	4,58	T/C	36,32	C|C	0,5	NA
Chr02	24702545	A	G	INTERGENIC	NA	A/A	4,0	A/G	3,63	A/G	33,35	G|G	0,6	NA
Chr02	24702546	T	C	INTERGENIC	NA	T/T	4,0	T/C	48,20	T/C	50,18	C|C	0,6	NA
Chr02	24702551	G	A	INTERGENIC	NA	G/G	4,0	G/A	46,20	G/A	54,18	A|A	0,6	NA
Chr02	24702552	G	A	INTERGENIC	NA	G/G	4,0	G/A	45,21	G/A	54,18	A|A	0,6	NA
Chr02	24702568	T	C	INTERGENIC	NA	T/T	4,0	T/C	2,62	T/C	36,30	C/C	0,5	NA
Chr02	24702585	T	C	INTERGENIC	NA	T/T	4,0	T/C	15,47	T/C	44,22	C/C	0,4	NA
Chr02	24702605	T	G	INTERGENIC	NA	T/T	3,0	T/G	54,6	T/G	58,8	G|G	0,2	NA
Chr02	24702613	C	A	INTERGENIC	NA	C/C	3,0	C/A	29,21	C/A	50,14	A|A	0,2	NA
Chr02	24702631	C	T	INTERGENIC	NA	C/C	2,0	C/T	3,43	C/T	41,19	T|T	0,4	NA
Chr02	24702632	G	A	INTERGENIC	NA	G/G	2,0	G/A	22,30	G/A	50,10	A|A	0,4	NA
Chr02	24702677	T	G	INTERGENIC	NA	T/T	2,0	T/G	2,26	T/G	41,13	G/G	0,4	NA
Chr02	24702698	T	A	INTERGENIC	NA	T/T	2,0	T/A	50,2	T/A	62,2	A|A	0,2	NA
Chr02	24704171	T	G	INTERGENIC	NA	T/T	3,0	T/G	2,6	T/G	64,8	G|G	0,1	NA
Chr02	24704179	C	T	INTERGENIC	NA	C/C	3,0	C/T	12,4	C/T	65,5	T|T	0,1	NA
Chr02	24705896	G	A	INTERGENIC	NA	G/G	7,0	G/A	8,12	G/A	57,7	A|A	0,2	NA
Chr02	24705900	A	G	INTERGENIC	NA	A/A	7,0	A/G	8,12	A/G	57,7	G|G	0,2	NA
Chr02	24705909	T	G	INTERGENIC	NA	T/T	7,0	T/G	2,14	T/G	53,9	G|G	0,2	NA
Chr02	24705965	C	G	INTERGENIC	NA	C/C	6,0	C/G	8,12	C/G	58,8	G/G	0,2	NA
Chr02	24708231	T	C	INTERGENIC	NA	T/T	1,0	T/C	3,23	T/C	60,6	C/C	0,6	NA
Chr02	24708283	A	G	INTERGENIC	NA	A/A	3,0	A/G	16,10	A/G	64,6	G/G	0,4	NA
Chr02	24709233	T	C	INTERGENIC	NA	T/T	10,0	T/C	3,15	T/C	53,13	C/C	0,2	NA
Chr02	24709248	C	T	INTERGENIC	NA	C/C	9,0	C/T	26,10	C/T	56,10	T/T	0,1	NA
Chr02	24709265	T	C	INTERGENIC	NA	T/T	9,0	T/C	20,12	T/C	54,10	C/C	0,3	NA
Chr02	24709284	A	G	INTERGENIC	NA	A/A	11,0	A/G	29,15	A/G	56,10	G/G	0,4	NA
Chr02	24709302	A	G	INTERGENIC	NA	A/A	6,0	A/G	10,32	A/G	52,16	G|G	0,4	NA
Chr02	24709305	C	T	INTERGENIC	NA	C/C	4,0	C/T	30,16	C/T	56,12	T|T	0,4	NA
Chr02	24709306	T	G	INTERGENIC	NA	T/T	4,0	T/G	8,32	T/G	52,16	G|G	0,4	NA
Chr02	24709363	G	A	INTERGENIC	NA	G/G	3,0	G/A	34,12	G/A	62,4	A|A	0,3	NA
Chr02	24710077	G	A	INTERGENIC	NA	G/G	2,0	G/A	27,17	G/A	58,12	A/A	0,2	NA
Chr02	24710089	G	T	INTERGENIC	NA	G/G	2,0	G/T	23,17	G/T	57,13	T|T	0,2	NA
Chr02	24710097	T	C	INTERGENIC	NA	T/T	2,0	T/C	27,17	T/C	56,14	C|C	0,2	NA
Chr02	24710098	T	C	INTERGENIC	NA	T/T	2,0	T/C	4,36	T/C	49,19	C|C	0,2	NA
Chr02	24710145	C	T	INTERGENIC	NA	C/C	2,0	C/T	27,17	C/T	55,11	T/T	0,2	NA
Chr02	24710162	C	T	INTERGENIC	NA	C/C	2,0	C/T	4,36	C/T	45,15	T/T	0,2	NA
Chr02	24710722	T	C	INTERGENIC	NA	T/T	2,0	T/C	35,15	T/C	55,15	C|C	0,1	NA
Chr02	24710782	C	A	INTERGENIC	NA	C/C	3,0	C/A	3,63	C/A	35,35	A/A	0,3	NA
Chr02	24711055	C	G	INTERGENIC	NA	C/C	3,0	C/G	2,70	C/G	32,38	G/G	0,19	NA
Chr02	24711180	G	A	INTERGENIC	NA	G/G	5,0	G/A	2,68	G/A	31,35	A/A	0,10	NA
Chr02	24711219	T	C	INTERGENIC	NA	T/T	4,0	T/C	2,64	T/C	31,35	C|C	0,9	NA
Chr02	24711233	A	G	INTERGENIC	NA	A/A	6,0	A/G	14,50	A/G	34,30	G|G	0,8	NA
Chr02	24711243	T	A	INTERGENIC	NA	T/T	6,0	T/A	2,62	T/A	32,32	A|A	0,10	NA
Chr02	24711411	C	T	INTERGENIC	NA	C/C	5,0	C/T	34,4	C/C	66,0	T|T	0,2	NA
Chr02	24711415	C	T	INTERGENIC	NA	C/C	6,0	C/T	34,4	C/C	64,0	T|T	0,2	NA
Chr02	24716088	G	A	INTERGENIC	NA	G/G	6,0	G/A	30,18	G/A	63,7	A/A	0,2	NA
Chr02	24716121	C	T	INTERGENIC	NA	C/C	8,0	C/T	55,11	C/T	59,11	T/T	0,3	NA
Chr02	24716145	G	A	INTERGENIC	NA	G/G	10,0	G/A	29,37	G/A	57,11	A/A	0,3	NA
Chr02	24716171	A	C	INTERGENIC	NA	A/A	8,0	A/C	58,12	A/C	57,13	C/C	0,3	NA
Chr02	24716289	A	G	INTERGENIC	NA	A/A	3,0	A/G	3,61	A/G	40,22	G/G	0,3	NA
Chr02	24716321	A	C	INTERGENIC	NA	A/A	3,0	A/C	1,39	A/C	47,11	C|C	0,2	NA
Chr02	24716324	A	G	INTERGENIC	NA	A/A	3,0	A/G	44,6	A/G	59,3	G|G	0,2	NA
Chr02	24716335	T	A	INTERGENIC	NA	T/T	3,0	T/A	52,6	T/A	57,3	A|A	0,1	NA
Chr02	24716340	T	C	INTERGENIC	NA	T/T	3,0	T/C	3,31	T/C	46,12	C|C	0,1	NA
Chr02	24716508	C	T	INTERGENIC	NA	C/C	5,0	C/T	61,1	C/T	70,2	T/T	0,2	NA
Chr02	24716552	T	C	INTERGENIC	NA	T/T	2,0	T/C	61,1	T/C	63,5	C/C	0,2	NA
Chr02	24716566	G	A	INTERGENIC	NA	G/G	2,0	G/A	63,1	G/A	63,3	A/A	0,2	NA
Chr02	24716579	A	G	INTERGENIC	NA	A/A	2,0	A/G	63,1	A/G	63,5	G/G	0,2	NA
Chr02	24726776	G	A	INTERGENIC	NA	G/G	3,0	G/A	33,35	G/A	49,21	A/A	2,12	NA
Chr02	24727815	G	A	INTERGENIC	NA	G/G	6,0	G/A	2,34	G/A	42,22	A|A	0,3	NA
Chr02	24727816	T	C	INTERGENIC	NA	T/T	6,0	T/C	2,34	T/C	42,22	C|C	0,3	NA
Chr02	24727831	T	C	INTERGENIC	NA	T/T	5,0	T/C	16,24	T/C	58,12	C/C	0,3	NA
Chr02	24733350	G	A	INTERGENIC	NA	G/G	4,0	G/A	38,6	G/A	66,2	A|A	0,2	NA
Chr02	24734209	G	A	INTERGENIC	NA	G/G	3,0	G/A	4,2	G/A	63,1	A/A	0,3	NA
Chr02	24734228	A	C	INTERGENIC	NA	A/A	3,0	A/C	4,2	A/C	63,1	C|C	0,3	NA
Chr02	24734231	T	A	INTERGENIC	NA	T/T	3,0	T/A	4,2	T/A	63,1	A|A	0,4	NA
Chr02	24734233	G	C	INTERGENIC	NA	G/G	3,0	G/C	6,2	G/C	63,1	C|C	0,4	NA
Chr02	24734263	C	T	INTERGENIC	NA	C/C	2,0	C/T	4,4	C/T	61,1	T|T	0,4	NA
Chr02	24734273	T	C	INTERGENIC	NA	T/T	2,0	T/C	4,4	T/C	63,1	C|C	0,4	NA
Chr02	24735429	A	T	INTERGENIC	NA	A/A	5,0	A/T	9,25	A/T	41,11	T|T	0,2	NA
Chr02	24735456	T	G	INTERGENIC	NA	T/T	3,0	T/G	13,17	T/G	56,6	G|G	0,2	NA
Chr02	24735754	T	C	INTERGENIC	NA	T/T	3,0	T/C	1,19	T/C	47,9	C|C	0,3	NA
Chr02	24735785	C	T	INTERGENIC	NA	C/C	2,0	C/T	35,25	C/T	53,15	T|T	0,5	NA
Chr02	24735801	T	C	INTERGENIC	NA	T/T	3,0	T/C	35,27	T/C	55,17	C|C	0,5	NA
Chr02	24735975	T	C	INTERGENIC	NA	T/T	4,0	T/C	62,4	T/C	65,7	C/C	0,2	NA
Chr02	24736066	G	A	INTERGENIC	NA	G/G	6,0	G/A	23,13	G/A	65,3	A|A	0,3	NA
Chr02	24736089	A	C	INTERGENIC	NA	A/A	7,0	A/C	25,13	A/C	67,1	C|C	0,3	NA
Chr02	24736165	A	G	INTERGENIC	NA	A/A	6,0	A/G	2,16	A/G	61,1	G/G	0,4	NA
Chr02	24736215	C	T	INTERGENIC	NA	C/C	5,0	C/T	10,10	C/T	63,3	T|T	0,2	NA
Chr02	24736228	G	T	INTERGENIC	NA	G/G	3,0	G/T	6,10	G/T	55,3	T|T	0,2	NA
Chr02	24736446	T	G	INTERGENIC	NA	T/T	3,0	T/G	7,65	T/G	31,39	G/G	0,16	NA
Chr02	24736657	A	G	INTERGENIC	NA	A/A	4,0	A/G	7,29	A/G	37,25	G|G	0,5	NA
Chr02	24736663	G	A	INTERGENIC	NA	G/G	4,0	G/A	11,29	G/A	37,25	A|A	0,5	NA
Chr02	24736744	A	G	INTERGENIC	NA	A/A	4,0	A/G	2,54	A/G	36,30	G/G	0,4	NA
Chr02	24736772	T	C	INTERGENIC	NA	T/T	5,0	T/C	2,60	T/C	34,28	C|C	0,5	NA
Chr02	24736778	C	G	INTERGENIC	NA	C/C	5,0	C/G	25,41	C/G	51,15	G|G	0,5	NA
Chr02	24736784	C	T	INTERGENIC	NA	C/C	4,0	C/T	2,62	C/T	35,27	T|T	0,5	NA
Chr02	24736823	G	A	INTERGENIC	NA	G/G	5,0	G/A	2,60	G/A	39,33	A|A	0,6	NA
Chr02	24736827	A	T	INTERGENIC	NA	A/A	5,0	A/T	2,60	A/T	38,34	T|T	0,6	NA
Chr02	24736853	G	A	INTERGENIC	NA	G/G	6,0	G/A	1,57	G/A	38,30	A/A	0,6	NA
Chr02	24736895	C	T	INTERGENIC	NA	C/C	5,0	C/T	2,60	C/T	40,32	T/T	0,8	NA
Chr02	24736929	C	T	INTERGENIC	NA	C/C	4,0	C/T	2,54	C/T	38,34	T/T	0,8	NA
Chr02	24736981	A	C	INTERGENIC	NA	A/A	2,0	A/C	2,54	A/C	43,27	C|C	0,5	NA
Chr02	24736983	A	G	INTERGENIC	NA	A/A	2,0	A/G	2,54	A/G	43,27	G|G	0,5	NA
Chr02	24736988	A	T	INTERGENIC	NA	A/A	2,0	A/T	2,54	A/T	43,27	T|T	0,6	NA
Chr02	24737050	C	G	INTERGENIC	NA	C/C	1,0	C/G	2,40	C/G	47,19	G|G	0,9	NA
Chr02	24737117	C	T	INTERGENIC	NA	C/C	3,0	C/T	2,52	C/T	43,25	T/T	0,8	NA
Chr02	24737216	G	C	INTERGENIC	NA	G/G	1,0	G/C	3,49	G/C	40,28	C|C	0,9	NA
Chr02	24737233	C	T	INTERGENIC	NA	C/C	2,0	C/T	3,43	C/T	33,27	T|T	0,8	NA
Chr02	24737240	A	G	INTERGENIC	NA	A/A	1,0	A/G	3,41	A/G	35,27	G|G	0,8	NA
Chr02	24737264	G	T	INTERGENIC	NA	G/G	1,0	G/T	4,34	G/T	30,20	T|T	0,8	NA
Chr02	24737277	G	A	INTERGENIC	NA	G/G	1,0	G/A	4,32	G/A	34,18	A|A	0,7	NA
Chr02	24737296	G	A	INTERGENIC	NA	G/G	2,0	G/A	4,30	G/A	35,19	A|A	0,5	NA
Chr02	24737345	G	T	INTERGENIC	NA	G/G	3,0	G/T	4,22	G/T	20,14	T|T	0,2	NA
Chr02	24737360	C	T	INTERGENIC	NA	C/C	3,0	C/T	4,20	C/T	15,13	T|T	0,4	NA
Chr02	24737361	A	G	INTERGENIC	NA	A/A	3,0	A/G	4,20	A/G	15,13	G|G	0,4	NA
Chr02	24737521	G	C	INTERGENIC	NA	G/G	3,0	G/C	10,42	G/C	40,28	C/C	0,4	NA
Chr02	24737575	G	T	INTERGENIC	NA	G/G	7,0	G/T	7,53	G/T	38,30	T/T	0,7	NA
Chr02	24737653	A	G	INTERGENIC	NA	A/A	6,0	A/G	3,61	A/G	38,30	G/G	0,10	NA
Chr02	24737723	A	G	INTERGENIC	NA	A/A	3,0	A/G	2,44	A/G	36,26	G/G	0,9	NA
Chr02	24737752	T	C	INTERGENIC	NA	T/T	2,0	T/C	4,50	T/C	41,25	C/C	0,7	NA
Chr02	24737766	C	T	INTERGENIC	NA	C/C	2,0	C/T	4,46	C/T	45,21	T/T	0,6	NA
Chr02	24738061	A	C	INTERGENIC	NA	A/A	3,0	A/C	3,25	A/C	54,8	C|C	0,2	NA
Chr02	24738065	C	T	INTERGENIC	NA	C/C	2,0	C/T	9,23	C/T	54,8	T|T	0,2	NA
Chr02	24738070	A	T	INTERGENIC	NA	A/A	2,0	A/T	7,21	A/T	52,8	T|T	0,2	NA
Chr02	24738089	T	G	INTERGENIC	NA	T/T	2,0	T/G	3,15	T/G	55,5	G|G	0,1	NA
Chr02	24738097	A	G	INTERGENIC	NA	A/A	3,0	A/G	3,15	A/G	59,5	G|G	0,1	NA
Chr02	24738115	A	C	INTERGENIC	NA	A/A	3,0	A/C	3,15	A/C	56,2	C|C	0,1	NA
Chr02	24738133	G	A	INTERGENIC	NA	G/G	3,0	G/A	1,13	G/A	55,5	A|A	0,2	NA
Chr02	24738143	G	A	INTERGENIC	NA	G/G	4,0	G/A	3,15	G/A	58,6	A|A	0,3	NA
Chr02	24738189	C	T	INTERGENIC	NA	C/C	2,0	C/T	2,16	C/T	45,11	T|T	0,1	NA
Chr02	24738268	C	A	INTERGENIC	NA	C/C	3,0	C/A	3,47	C/A	37,27	A|A	0,3	NA
Chr02	24738279	C	T	INTERGENIC	NA	C/C	3,0	C/T	3,47	C/T	34,28	T|T	0,3	NA
Chr02	24738289	G	C	INTERGENIC	NA	G/G	2,0	G/C	3,45	G/C	36,24	C|C	0,3	NA
Chr02	24738298	C	T	INTERGENIC	NA	C/C	2,0	C/T	3,43	C/T	38,24	T|T	0,5	NA
Chr02	24738352	A	G	INTERGENIC	NA	A/A	1,0	A/G	1,41	A/G	35,27	G|G	0,5	NA
Chr02	24738354	C	A	INTERGENIC	NA	C/C	1,0	C/A	46,10	C/A	55,9	A|A	0,5	NA
Chr02	24738364	G	A	INTERGENIC	NA	G/G	1,0	G/A	3,41	G/A	28,30	A|A	0,5	NA
Chr02	24738465	T	C	INTERGENIC	NA	T/T	1,0	T/C	2,54	T/C	27,33	C/C	0,12	NA
Chr02	24738517	G	A	INTERGENIC	NA	G/G	1,0	G/A	3,53	G/A	33,33	A|A	0,11	NA
Chr02	24738521	G	A	INTERGENIC	NA	G/G	1,0	G/A	1,53	G/A	33,33	A|A	0,11	NA
Chr02	24738525	A	G	INTERGENIC	NA	A/A	1,0	A/G	3,51	A/G	33,33	G|G	0,9	NA
Chr02	24738528	T	G	INTERGENIC	NA	T/T	1,0	T/G	3,49	T/G	27,31	G|G	0,9	NA
Chr02	24738572	A	G	INTERGENIC	NA	A/A	1,0	A/G	3,55	A/G	33,33	G|G	0,8	NA
Chr02	24738617	A	G	INTERGENIC	NA	A/A	1,0	A/G	2,58	A/G	38,26	G|G	0,6	NA
Chr02	24738636	T	C	INTERGENIC	NA	T/T	1,0	T/C	2,54	T/C	40,26	C|C	0,5	NA
Chr02	24738655	G	A	INTERGENIC	NA	G/G	1,0	G/A	2,54	G/A	40,26	A|A	0,6	NA
Chr02	24738670	A	G	INTERGENIC	NA	A/A	1,0	A/G	2,54	A/G	38,28	G|G	0,6	NA
Chr02	24738713	G	T	INTERGENIC	NA	G/G	1,0	G/T	2,50	G/T	44,26	T|T	0,4	NA
Chr02	24738720	T	C	INTERGENIC	NA	T/T	1,0	T/C	2,48	T/C	44,26	C|C	0,4	NA
Chr02	24739251	T	C	INTERGENIC	NA	T/T	1,0	T/C	3,63	T/C	36,32	C|C	0,5	NA
Chr02	24739344	T	G	INTERGENIC	NA	T/T	4,0	T/G	11,47	T/G	45,27	G|G	0,5	NA
Chr02	24739363	G	A	INTERGENIC	NA	G/G	4,0	G/A	2,58	G/A	42,26	A|A	0,5	NA
Chr02	24739522	A	C	INTERGENIC	NA	A/A	4,0	A/C	2,40	A/C	45,21	C|C	0,7	NA
Chr02	24739523	G	A	INTERGENIC	NA	G/G	4,0	G/A	2,40	G/A	45,21	A|A	0,7	NA
Chr02	24739529	A	G	INTERGENIC	NA	A/A	4,0	A/G	2,40	A/G	46,20	G|G	0,8	NA
Chr02	24739953	G	T	INTERGENIC	NA	G/G	1,0	G/T	1,51	G/T	36,28	T/T	0,10	NA
Chr02	24740006	C	T	INTERGENIC	NA	C/C	1,0	C/T	3,47	C/T	38,28	T/T	0,14	NA
Chr02	24740033	T	G	INTERGENIC	NA	T/T	3,0	T/G	4,44	T/G	38,26	G|G	0,13	NA
Chr02	24740053	G	A	INTERGENIC	NA	G/G	3,0	G/A	4,46	G/A	38,24	A|A	0,13	NA
Chr02	24741065	A	T	INTERGENIC	NA	A/A	4,0	A/T	10,56	A/T	36,34	T|T	0,2	NA
Chr02	24741090	G	C	INTERGENIC	NA	G/G	4,0	G/C	11,57	G/C	39,33	C|C	0,3	NA
Chr02	24742936	G	A	INTERGENIC	NA	G/G	4,0	G/A	6,4	G/A	55,5	A|A	0,3	NA
Chr02	24742937	C	T	INTERGENIC	NA	C/C	4,0	C/T	6,4	C/T	55,5	T|T	0,3	NA
Chr02	24742942	C	G	INTERGENIC	NA	C/C	4,0	C/G	6,4	C/G	57,5	G|G	0,3	NA
Chr02	24742945	C	T	INTERGENIC	NA	C/C	5,0	C/T	6,4	C/T	57,5	T|T	0,3	NA
Chr02	24742947	A	T	INTERGENIC	NA	A/A	5,0	A/T	6,4	A/T	57,5	T|T	0,3	NA
Chr02	24742951	A	C	INTERGENIC	NA	A/A	5,0	A/C	4,4	A/C	53,5	C|C	0,3	NA
Chr02	24742957	C	G	INTERGENIC	NA	C/C	4,0	C/G	6,4	C/G	55,5	G|G	0,5	NA
Chr02	24743074	T	C	INTERGENIC	NA	T/T	4,0	T/C	8,4	T/C	59,3	C/C	0,4	NA
Chr02	24744211	G	A	INTERGENIC	NA	G/G	11,0	G/A	7,33	G/A	58,10	A/A	0,2	NA
Chr02	24744227	G	C	INTERGENIC	NA	G/G	9,0	G/C	11,31	G/C	56,10	C/C	0,2	NA
Chr02	24744268	C	T	INTERGENIC	NA	C/C	8,0	C/T	12,34	C/T	58,10	T/T	0,2	NA
Chr02	24746621	C	A	INTERGENIC	NA	C/C	9,0	C/A	4,8	C/A	58,4	A|A	0,2	NA
Chr02	24746627	T	G	INTERGENIC	NA	T/T	9,0	T/G	4,8	T/G	60,4	G|G	0,2	NA
Chr02	24747010	G	A	INTERGENIC	NA	G/G	2,0	G/A	18,14	G/A	54,6	A/A	0,1	NA
Chr02	24747062	G	T	INTERGENIC	NA	G/G	3,0	G/T	18,18	G/T	55,7	T/T	0,3	NA
Chr02	24747103	G	T	INTERGENIC	NA	G/G	4,0	G/T	3,25	G/T	48,8	T/T	0,3	NA
Chr02	24750124	G	A	INTERGENIC	NA	G/G	8,0	G/A	5,53	G/A	46,22	A/A	0,4	NA
Chr02	24750135	A	C	INTERGENIC	NA	A/A	6,0	A/C	5,55	A/C	46,24	C/C	0,5	NA
Chr02	24750183	A	T	INTERGENIC	NA	A/A	4,0	A/T	4,64	A/T	42,30	T/T	0,8	NA
Chr02	24750201	C	G	INTERGENIC	NA	C/C	4,0	C/G	2,66	C/G	38,34	G|G	0,8	NA
Chr02	24750207	T	G	INTERGENIC	NA	T/T	4,0	T/G	2,66	T/G	36,34	G|G	0,9	NA
Chr02	24750238	A	G	INTERGENIC	NA	A/A	2,0	A/G	3,67	A/G	37,31	G/G	0,10	NA
Chr02	24750350	C	T	INTERGENIC	NA	C/C	2,0	C/T	3,61	C/T	38,30	T|T	0,9	NA
Chr02	24750360	A	G	INTERGENIC	NA	A/A	2,0	A/G	3,61	A/G	38,30	G|G	0,9	NA
Chr02	24750372	C	A	INTERGENIC	NA	C/C	2,0	C/A	3,55	C/A	39,29	A|A	0,11	NA
Chr02	24750393	A	C	INTERGENIC	NA	A/A	2,0	A/C	3,55	A/C	37,33	C|C	0,9	NA
Chr02	24750424	A	G	INTERGENIC	NA	A/A	1,0	A/G	3,57	A/G	36,34	G|G	0,8	NA
Chr02	24750431	C	T	INTERGENIC	NA	C/C	1,0	C/T	3,59	C/T	34,34	T|T	0,8	NA
Chr02	24750442	A	C	INTERGENIC	NA	A/A	1,0	A/C	3,59	A/C	35,33	C|C	0,8	NA
Chr02	24750453	A	G	INTERGENIC	NA	A/A	1,0	A/G	3,59	A/G	36,32	G|G	0,8	NA
Chr02	24750468	C	T	INTERGENIC	NA	C/C	1,0	C/T	3,59	C/T	37,31	T|T	0,9	NA
Chr02	24750475	T	G	INTERGENIC	NA	T/T	1,0	T/G	3,59	T/G	39,31	G|G	0,9	NA
Chr02	24750526	G	T	INTERGENIC	NA	G/G	1,0	G/T	2,66	G/T	39,33	T|T	0,11	NA
Chr02	24750535	A	C	INTERGENIC	NA	A/A	1,0	A/C	2,66	A/C	40,32	C|C	0,11	NA
Chr02	24750539	C	G	INTERGENIC	NA	C/C	1,0	C/G	2,66	C/G	38,32	G|G	0,11	NA
Chr02	24750564	T	C	INTERGENIC	NA	T/T	1,0	T/C	2,66	T/C	40,32	C/C	0,12	NA
Chr02	24750584	A	G	INTERGENIC	NA	A/A	1,0	A/G	2,64	A/G	39,33	G/G	0,12	NA
Chr02	24750603	A	C	INTERGENIC	NA	A/A	2,0	A/C	2,64	A/C	40,30	C|C	0,12	NA
Chr02	24750608	A	G	INTERGENIC	NA	A/A	2,0	A/G	2,64	A/G	40,30	G|G	0,12	NA
Chr02	24750610	A	T	INTERGENIC	NA	A/A	2,0	A/T	2,64	A/T	41,29	T|T	0,12	NA
Chr02	24750619	A	G	INTERGENIC	NA	A/A	3,0	A/G	2,64	A/G	37,31	G|G	0,11	NA
Chr02	24750646	T	G	INTERGENIC	NA	T/T	4,0	T/G	1,65	T/G	40,30	G/G	0,10	NA
Chr02	24750695	C	A	INTERGENIC	NA	C/C	4,0	C/A	3,65	C/A	35,33	A|A	0,6	NA
Chr02	24750762	G	A	INTERGENIC	NA	G/G	7,0	G/A	3,61	G/A	34,34	A/A	0,8	NA
Chr02	24750781	G	A	INTERGENIC	NA	G/G	7,0	G/A	3,61	G/A	39,31	A/A	0,9	NA
Chr02	24750803	C	T	INTERGENIC	NA	C/C	7,0	C/T	3,59	C/T	36,32	T|T	0,10	NA
Chr02	24750804	T	C	INTERGENIC	NA	T/T	7,0	T/C	1,59	T/C	33,33	C|C	0,10	NA
Chr02	24750853	T	G	INTERGENIC	NA	T/T	7,0	T/G	29,43	T/G	52,20	G|G	0,11	NA
Chr02	24750876	A	G	INTERGENIC	NA	A/A	8,0	A/G	2,62	A/G	36,30	G|G	0,9	NA
Chr02	24750924	G	A	INTERGENIC	NA	G/G	5,0	G/A	5,65	G/A	36,34	A|A	0,7	NA
Chr02	24750940	A	T	INTERGENIC	NA	A/A	5,0	A/T	3,65	A/T	31,33	T|T	0,5	NA
Chr02	24751065	G	T	INTERGENIC	NA	G/G	5,0	G/T	2,58	G/T	29,33	T|T	0,5	NA
Chr02	24751070	T	C	INTERGENIC	NA	T/T	6,0	T/C	2,58	T/C	23,33	C|C	0,5	NA
Chr02	24751106	G	A	INTERGENIC	NA	G/G	7,0	G/A	2,60	G/A	29,39	A|A	0,7	NA
Chr02	24751109	G	A	INTERGENIC	NA	G/G	5,0	G/A	2,60	G/A	29,39	A|A	0,7	NA
Chr02	24751110	G	A	INTERGENIC	NA	G/G	5,0	G/A	2,60	G/A	29,39	A|A	0,7	NA
Chr02	24751119	A	G	INTERGENIC	NA	A/A	5,0	A/G	1,59	A/G	30,36	G|G	0,9	NA
Chr02	24751131	A	C	INTERGENIC	NA	A/A	5,0	A/C	1,59	A/C	33,31	C|C	0,10	NA
Chr02	24751136	T	C	INTERGENIC	NA	T/T	5,0	T/C	3,59	T/C	35,31	C|C	0,10	NA
Chr02	24751161	T	G	INTERGENIC	NA	T/T	6,0	T/G	1,59	T/G	30,34	G|G	0,11	NA
Chr02	24751168	A	C	INTERGENIC	NA	A/A	7,0	A/C	3,59	A/C	30,34	C|C	0,11	NA
Chr02	24751183	A	G	INTERGENIC	NA	A/A	5,0	A/G	1,59	A/G	29,35	G|G	0,13	NA
Chr02	24751194	C	G	INTERGENIC	NA	C/C	5,0	C/G	1,61	C/G	28,36	G|G	0,13	NA
Chr02	24751254	G	A	INTERGENIC	NA	G/G	3,0	G/A	3,59	G/A	30,42	A|A	0,12	NA
Chr02	24751260	A	C	INTERGENIC	NA	A/A	3,0	A/C	3,59	A/C	31,41	C|C	0,11	NA
Chr02	24751273	A	G	INTERGENIC	NA	A/A	4,0	A/G	3,59	A/G	34,36	G/G	0,10	NA
Chr02	24751284	T	C	INTERGENIC	NA	T/T	4,0	T/C	3,61	T/C	34,36	C/C	0,9	NA
Chr02	24751344	C	A	INTERGENIC	NA	C/C	2,0	C/A	3,65	C/A	33,37	A/A	0,4	NA
Chr02	24751359	G	C	INTERGENIC	NA	G/G	2,0	G/C	48,22	G/C	55,17	C/C	0,3	NA
Chr02	24751382	T	C	INTERGENIC	NA	T/T	2,0	T/C	3,67	T/C	33,39	C/C	0,4	NA
Chr02	24751427	A	C	INTERGENIC	NA	A/A	1,0	A/C	4,62	A/C	35,35	C/C	0,6	NA
Chr02	24751444	G	T	INTERGENIC	NA	G/G	1,0	G/T	3,65	G/T	35,35	T/T	0,10	NA
Chr02	24751511	T	C	INTERGENIC	NA	T/T	2,0	T/C	3,61	T/C	35,37	C/C	0,12	NA
Chr02	24751525	T	G	INTERGENIC	NA	T/T	3,0	T/G	3,59	T/G	33,37	G|G	0,12	NA
Chr02	24751533	A	C	INTERGENIC	NA	A/A	3,0	A/C	3,61	A/C	34,36	C|C	0,13	NA
Chr02	24751543	T	C	INTERGENIC	NA	T/T	3,0	T/C	2,60	T/C	36,36	C|C	0,14	NA
Chr02	24751549	T	C	INTERGENIC	NA	T/T	3,0	T/C	2,60	T/C	35,37	C|C	0,14	NA
Chr02	24751616	A	C	INTERGENIC	NA	A/A	2,0	A/C	2,68	A/C	40,32	C/C	0,13	NA
Chr02	24751631	G	A	INTERGENIC	NA	G/G	3,0	G/A	3,67	G/A	40,32	A/A	0,13	NA
Chr02	24751672	T	C	INTERGENIC	NA	T/T	3,0	T/C	2,68	T/C	38,34	C/C	0,16	NA
Chr02	24751742	A	G	INTERGENIC	NA	A/A	6,0	A/G	1,65	A/G	36,34	G/G	0,12	NA
Chr02	24751924	A	C	INTERGENIC	NA	A/A	3,0	A/C	2,70	A/C	33,37	C/C	0,8	NA
Chr02	24751945	A	T	INTERGENIC	NA	A/A	4,0	A/T	2,70	A/T	36,36	T|T	0,8	NA
Chr02	24751955	A	G	INTERGENIC	NA	A/A	4,0	A/G	2,66	A/G	34,34	G|G	0,9	NA
Chr02	24751962	C	G	INTERGENIC	NA	C/C	5,0	C/G	2,66	C/G	33,35	G|G	0,10	NA
Chr02	24751981	G	T	INTERGENIC	NA	G/G	5,0	G/T	2,66	G/T	40,32	T/T	0,10	NA
Chr02	24751992	T	G	INTERGENIC	NA	T/T	5,0	T/G	2,64	T/G	39,33	G/G	0,10	NA
Chr02	24752014	T	G	INTERGENIC	NA	T/T	4,0	T/G	2,62	T/G	33,33	G|G	0,13	NA
Chr02	24752020	G	T	INTERGENIC	NA	G/G	6,0	G/T	2,62	G/T	37,33	T|T	0,13	NA
Chr02	24752061	C	T	INTERGENIC	NA	C/C	5,0	C/T	2,56	C/T	32,34	T/T	0,9	NA
Chr02	24752105	G	A	INTERGENIC	NA	G/G	4,0	G/A	2,56	G/A	39,31	A/A	0,10	NA
Chr02	24752154	T	C	INTERGENIC	NA	T/T	4,0	T/C	2,62	T/C	39,33	C/C	0,6	NA
Chr02	24752188	A	C	INTERGENIC	NA	A/A	2,0	A/C	2,58	A/C	40,32	C/C	0,4	NA
Chr02	24752230	G	A	INTERGENIC	NA	G/G	2,0	G/A	4,60	G/A	39,31	A/A	0,4	NA
Chr02	24752243	T	C	INTERGENIC	NA	T/T	2,0	T/C	3,59	T/C	40,32	C|C	0,3	NA
Chr02	24752250	A	C	INTERGENIC	NA	A/A	3,0	A/C	2,60	A/C	41,31	C|C	0,3	NA
Chr02	24752283	A	G	INTERGENIC	NA	A/A	3,0	A/G	7,61	A/G	40,32	G/G	0,5	NA
Chr02	24752333	C	T	INTERGENIC	NA	C/C	5,0	C/T	6,60	C/T	35,33	T|T	0,6	NA
Chr02	24752339	T	C	INTERGENIC	NA	T/T	5,0	T/C	5,61	T/C	35,33	C|C	0,6	NA
Chr02	24752364	T	A	INTERGENIC	NA	T/T	4,0	T/A	5,57	T/A	30,36	A|A	0,6	NA
Chr02	24752377	A	G	INTERGENIC	NA	A/A	4,0	A/G	3,57	A/G	32,36	G|G	0,7	NA
Chr02	24752393	T	C	INTERGENIC	NA	T/T	3,0	T/C	31,33	T/C	30,32	C|C	0,7	NA
Chr02	24752394	A	G	INTERGENIC	NA	A/A	3,0	A/G	1,57	A/G	27,35	G|G	0,7	NA
Chr02	24752434	C	T	INTERGENIC	NA	C/C	2,0	C/T	5,59	C/T	34,32	T|T	0,7	NA
Chr02	24752450	A	G	INTERGENIC	NA	A/A	2,0	A/G	1,59	A/G	32,30	G|G	0,7	NA
Chr02	24752455	A	G	INTERGENIC	NA	A/A	2,0	A/G	1,59	A/G	32,30	G|G	0,7	NA
Chr02	24752457	C	T	INTERGENIC	NA	C/C	2,0	C/T	3,59	C/T	32,30	T|T	0,7	NA
Chr02	24752481	T	C	INTERGENIC	NA	T/T	1,0	T/C	1,57	T/C	31,31	C|C	0,7	NA
Chr02	24752525	T	A	INTERGENIC	NA	T/T	2,0	T/A	3,57	T/A	39,29	A|A	0,6	NA
Chr02	24752531	T	C	INTERGENIC	NA	T/T	2,0	T/C	3,57	T/C	39,29	C|C	0,5	NA
Chr02	24752559	A	G	INTERGENIC	NA	A/A	2,0	A/G	3,59	A/G	39,29	G/G	0,6	NA
Chr02	24752641	C	T	INTERGENIC	NA	C/C	2,0	C/T	3,63	C/T	37,29	T/T	0,9	NA
Chr02	24752671	G	A	INTERGENIC	NA	G/G	3,0	G/A	2,62	G/A	37,29	A|A	0,13	NA
Chr02	24752673	A	G	INTERGENIC	NA	A/A	3,0	A/G	2,62	A/G	37,29	G|G	0,14	NA
Chr02	24752693	G	A	INTERGENIC	NA	G/G	3,0	G/A	2,64	G/A	34,32	A|A	0,12	NA
Chr02	24752707	G	C	INTERGENIC	NA	G/G	3,0	G/C	2,62	G/C	35,31	C|C	0,12	NA
Chr02	24752708	G	A	INTERGENIC	NA	G/G	3,0	G/A	2,62	G/A	35,31	A|A	0,12	NA
Chr02	24752714	C	T	INTERGENIC	NA	C/C	3,0	C/T	2,62	C/T	35,31	T|T	0,12	NA
Chr02	24752782	G	C	INTERGENIC	NA	G/G	4,0	G/C	2,60	G/C	37,31	C/C	0,9	NA
Chr02	24752813	A	G	INTERGENIC	NA	A/A	4,0	A/G	2,60	A/G	40,30	G/G	0,8	NA
Chr02	24752844	T	C	INTERGENIC	NA	T/T	4,0	T/C	2,64	T/C	37,33	C/C	0,8	NA
Chr02	24752892	C	A	INTERGENIC	NA	C/C	4,0	C/A	2,70	C/A	38,34	A/A	0,8	NA
Chr02	24752904	T	C	INTERGENIC	NA	T/T	2,0	T/C	2,70	T/C	35,37	C/C	0,7	NA
Chr02	24752919	A	G	INTERGENIC	NA	A/A	2,0	A/G	2,72	A/G	36,34	G/G	0,7	NA
Chr02	24752989	T	C	INTERGENIC	NA	T/T	2,0	T/C	2,68	T/C	38,34	C/C	0,7	NA
Chr02	24753002	G	C	INTERGENIC	NA	G/G	2,0	G/C	2,70	G/C	40,32	C/C	0,5	NA
Chr02	24753013	G	T	INTERGENIC	NA	G/G	2,0	G/T	2,70	G/T	39,31	T/T	0,6	NA
Chr02	24753093	A	T	INTERGENIC	NA	A/A	3,0	A/T	2,70	A/T	38,32	T|T	0,6	NA
Chr02	24753113	T	C	INTERGENIC	NA	T/T	3,0	T/C	1,67	T/C	40,30	C/C	0,4	NA
Chr02	24753131	A	G	INTERGENIC	NA	A/A	3,0	A/G	2,68	A/G	37,29	G/G	0,5	NA
Chr02	24753176	G	A	INTERGENIC	NA	G/G	4,0	G/A	2,66	G/A	41,29	A/A	0,7	NA
Chr02	24753190	G	A	INTERGENIC	NA	G/G	2,0	G/A	3,65	G/A	39,31	A/A	0,8	NA
Chr02	24753213	C	T	INTERGENIC	NA	C/C	3,0	C/T	3,63	C/T	41,29	T/T	0,10	NA
Chr02	24753248	C	T	INTERGENIC	NA	C/C	3,0	C/T	3,63	C/T	38,30	T/T	0,11	NA
Chr02	24753336	T	C	INTERGENIC	NA	T/T	1,0	T/C	2,66	T/C	34,34	C/C	0,13	NA
Chr02	24753357	C	T	INTERGENIC	NA	C/C	1,0	C/T	2,68	C/T	40,32	T|T	0,15	NA
Chr02	24753358	A	G	INTERGENIC	NA	A/A	1,0	A/G	2,68	A/G	40,32	G|G	0,15	NA
Chr02	24753401	A	T	INTERGENIC	NA	A/A	2,0	A/T	2,70	A/T	40,32	T/T	0,14	NA
Chr02	24753445	C	T	INTERGENIC	NA	C/C	2,0	C/T	2,68	C/T	37,35	T/T	0,13	NA
Chr02	24753488	T	A	INTERGENIC	NA	T/T	2,0	T/A	2,66	T/A	40,32	A/A	0,14	NA
Chr02	24753538	G	C	INTERGENIC	NA	G/G	6,0	G/C	2,66	G/C	42,30	C/C	0,9	NA
Chr02	24753597	A	G	INTERGENIC	NA	A/A	7,0	A/G	3,57	A/G	39,31	G/G	0,7	NA
Chr02	24753627	T	C	INTERGENIC	NA	T/T	7,0	T/C	4,58	T/C	36,34	C/C	0,4	NA
Chr02	24753638	T	G	INTERGENIC	NA	T/T	7,0	T/G	4,58	T/G	34,36	G/G	0,3	NA
Chr02	24753701	A	T	INTERGENIC	NA	A/A	3,0	A/T	4,56	A/T	34,38	T/T	0,3	NA
Chr02	24753715	A	T	INTERGENIC	NA	A/A	3,0	A/T	5,55	A/T	35,37	T/T	0,3	NA
Chr02	24753741	G	A	INTERGENIC	NA	G/G	1,0	G/A	5,63	G/A	38,34	A/A	0,2	NA
Chr02	24753832	G	A	INTERGENIC	NA	G/G	2,0	G/A	2,66	G/A	41,31	A|A	0,1	NA
Chr02	24753840	T	A	INTERGENIC	NA	T/T	2,0	T/A	4,66	T/A	41,31	A|A	0,1	NA
Chr02	24753852	C	A	INTERGENIC	NA	C/C	2,0	C/A	2,66	C/A	42,30	A|A	0,2	NA
Chr02	24753860	G	A	INTERGENIC	NA	G/G	2,0	G/A	2,64	G/A	41,31	A|A	0,2	NA
Chr02	24753886	A	C	INTERGENIC	NA	A/A	2,0	A/C	3,61	A/C	40,32	C|C	0,3	NA
Chr02	24753887	C	T	INTERGENIC	NA	C/C	2,0	C/T	3,61	C/T	40,32	T|T	0,3	NA
Chr02	24753889	G	T	INTERGENIC	NA	G/G	2,0	G/T	3,61	G/T	40,32	T|T	0,3	NA
Chr02	24753896	T	A	INTERGENIC	NA	T/T	2,0	T/A	3,59	T/A	38,34	A|A	0,3	NA
Chr02	24753939	A	C	INTERGENIC	NA	A/A	2,0	A/C	44,18	A/C	58,14	C|C	0,2	NA
Chr02	24753943	T	C	INTERGENIC	NA	T/T	2,0	T/C	3,59	T/C	38,32	C|C	0,2	NA
Chr02	24754006	A	G	INTERGENIC	NA	A/A	2,0	A/G	3,61	A/G	33,35	G/G	0,7	NA
Chr02	24754028	A	T	INTERGENIC	NA	A/A	2,0	A/T	3,63	A/T	34,36	T/T	0,6	NA
Chr02	24754070	C	G	INTERGENIC	NA	C/C	2,0	C/G	3,61	C/G	37,35	G|G	0,8	NA
Chr02	24754072	G	C	INTERGENIC	NA	G/G	2,0	G/C	3,61	G/C	37,35	C|C	0,8	NA
Chr02	24754079	A	T	INTERGENIC	NA	A/A	2,0	A/T	3,61	A/T	37,35	T|T	0,8	NA
Chr02	24754113	C	T	INTERGENIC	NA	C/C	1,0	C/T	2,62	C/T	35,33	T/T	0,9	NA
Chr02	24754151	C	T	INTERGENIC	NA	C/C	2,0	C/T	2,58	C/T	36,34	T/T	0,8	NA
Chr02	24754167	G	T	INTERGENIC	NA	G/G	2,0	G/T	2,64	G/T	36,32	T/T	0,9	NA
Chr02	24754216	C	A	INTERGENIC	NA	C/C	1,0	C/A	2,66	C/A	35,31	A|A	0,9	NA
Chr02	24754217	T	G	INTERGENIC	NA	T/T	1,0	T/G	2,66	T/G	35,31	G|G	0,9	NA
Chr02	24754222	T	C	INTERGENIC	NA	T/T	1,0	T/C	2,66	T/C	37,29	C|C	0,9	NA
Chr02	24754314	A	G	INTERGENIC	NA	A/A	3,0	A/G	1,67	A/G	41,29	G/G	0,14	NA
Chr02	24754343	G	A	INTERGENIC	NA	G/G	3,0	G/A	1,65	G/A	39,27	A/A	0,15	NA
Chr02	24754377	C	A	INTERGENIC	NA	C/C	2,0	C/A	1,63	C/A	40,26	A/A	0,14	NA
Chr02	24754442	T	C	INTERGENIC	NA	T/T	2,0	T/C	3,59	T/C	42,26	C/C	0,13	NA
Chr02	24754469	T	A	INTERGENIC	NA	T/T	2,0	T/A	5,57	T/A	41,25	A|A	0,14	NA
Chr02	24754525	A	C	INTERGENIC	NA	A/A	2,0	A/C	3,65	A/C	41,29	C/C	0,15	NA
Chr02	24754611	A	G	INTERGENIC	NA	A/A	5,0	A/G	3,61	A/G	36,34	G/G	0,13	NA
Chr02	24754663	G	A	INTERGENIC	NA	G/G	5,0	G/A	3,61	G/A	33,35	A|A	0,14	NA
Chr02	24754665	C	T	INTERGENIC	NA	C/C	5,0	C/T	3,61	C/T	33,35	T|T	0,14	NA
Chr02	24754668	A	G	INTERGENIC	NA	A/A	5,0	A/G	3,61	A/G	33,35	G|G	0,14	NA
Chr02	24754696	T	A	INTERGENIC	NA	T/T	4,0	T/A	3,61	T/A	35,35	A/A	0,19	NA
Chr02	24754737	T	A	INTERGENIC	NA	T/T	4,0	T/A	2,64	T/A	34,38	A/A	0,11	NA
Chr02	24754765	C	T	INTERGENIC	NA	C/C	1,0	C/T	2,66	C/T	35,37	T/T	0,8	NA
Chr02	24754793	T	A	INTERGENIC	NA	T/T	3,0	T/A	2,64	T/A	36,34	A|A	0,6	NA
Chr02	24754796	A	G	INTERGENIC	NA	A/A	3,0	A/G	2,64	A/G	36,34	G|G	0,6	NA
Chr02	24754800	C	T	INTERGENIC	NA	C/C	3,0	C/T	2,64	C/T	36,34	T|T	0,6	NA
Chr02	24754801	C	G	INTERGENIC	NA	C/C	3,0	C/G	2,64	C/G	36,34	G|G	0,6	NA
Chr02	24754815	A	G	INTERGENIC	NA	A/A	4,0	A/G	2,62	A/G	38,34	G/G	0,8	NA
Chr02	24754837	T	G	INTERGENIC	NA	T/T	4,0	T/G	2,68	T/G	35,33	G/G	0,9	NA
Chr02	24754869	A	G	INTERGENIC	NA	A/A	4,0	A/G	2,64	A/G	34,34	G|G	0,11	NA
Chr02	24754872	A	C	INTERGENIC	NA	A/A	4,0	A/C	2,64	A/C	36,34	C|C	0,11	NA
Chr02	24754885	G	A	INTERGENIC	NA	G/G	4,0	G/A	2,60	G/A	34,32	A/A	0,10	NA
Chr02	24754897	T	A	INTERGENIC	NA	T/T	5,0	T/A	2,60	T/A	31,31	A/A	0,11	NA
Chr02	24754928	T	C	INTERGENIC	NA	T/T	3,0	T/C	2,54	T/C	31,33	C/C	0,11	NA
Chr02	24754957	C	T	INTERGENIC	NA	C/C	3,0	C/T	2,60	C/T	30,34	T/T	0,13	NA
Chr02	24754989	A	G	INTERGENIC	NA	A/A	2,0	A/G	2,58	A/G	34,34	G|G	0,8	NA
Chr02	24754998	T	C	INTERGENIC	NA	T/T	2,0	T/C	3,57	T/C	34,34	C|C	0,7	NA
Chr02	24755000	G	A	INTERGENIC	NA	G/G	2,0	G/A	21,39	G/A	48,22	A|A	0,7	NA
Chr02	24755077	C	T	INTERGENIC	NA	C/C	3,0	C/T	2,54	C/T	30,32	T|T	0,5	NA
Chr02	24755079	C	G	INTERGENIC	NA	C/C	3,0	C/G	2,54	C/G	26,32	G|G	0,5	NA
Chr02	24755080	C	T	INTERGENIC	NA	C/C	3,0	C/T	2,54	C/T	26,32	T|T	0,5	NA
Chr02	24755083	T	G	INTERGENIC	NA	T/T	3,0	T/G	2,54	T/G	28,32	G|G	0,4	NA
Chr02	24755114	A	T	INTERGENIC	NA	A/A	3,0	A/T	2,60	A/T	37,29	T|T	0,11	NA
Chr02	24755118	T	C	INTERGENIC	NA	T/T	3,0	T/C	2,60	T/C	37,29	C|C	0,11	NA
Chr02	24755120	C	G	INTERGENIC	NA	C/C	3,0	C/G	2,60	C/G	37,29	G/G	0,9	NA
Chr02	24755145	T	C	INTERGENIC	NA	T/T	3,0	T/C	2,62	T/C	40,24	C|C	0,12	NA
Chr02	24755154	C	T	INTERGENIC	NA	C/C	3,0	C/T	2,58	C/T	38,26	T|T	0,12	NA
Chr02	24755297	T	G	INTERGENIC	NA	T/T	1,0	T/G	2,58	T/G	36,28	G|G	0,8	NA
Chr02	24755314	G	A	INTERGENIC	NA	G/G	1,0	G/A	1,59	G/A	31,29	A|A	0,8	NA
Chr02	24755317	T	C	INTERGENIC	NA	T/T	1,0	T/C	1,59	T/C	33,29	C|C	0,9	NA
Chr02	24755939	C	T	INTERGENIC	NA	C/C	1,0	C/T	2,46	C/T	40,24	T|T	0,11	NA
Chr02	24755943	T	C	INTERGENIC	NA	T/T	1,0	T/C	2,46	T/C	40,24	C|C	0,11	NA
Chr02	24756022	A	T	INTERGENIC	NA	A/A	1,0	A/T	2,44	A/T	32,28	T|T	0,12	NA
Chr02	24756041	G	A	INTERGENIC	NA	G/G	1,0	G/A	2,46	G/A	32,26	A|A	0,11	NA
Chr02	24756046	T	C	INTERGENIC	NA	T/T	1,0	T/C	2,46	T/C	29,25	C|C	0,11	NA
Chr02	24756057	A	T	INTERGENIC	NA	A/A	1,0	A/T	3,43	A/T	33,25	T|T	0,10	NA
Chr02	24756124	T	A	INTERGENIC	NA	T/T	1,0	T/A	4,42	T/A	30,28	A|A	0,6	NA
Chr02	24756133	A	G	INTERGENIC	NA	A/A	1,0	A/G	4,42	A/G	35,27	G|G	0,6	NA
Chr02	24756137	A	C	INTERGENIC	NA	A/A	1,0	A/C	4,42	A/C	33,27	C|C	0,6	NA
Chr02	24756172	C	A	INTERGENIC	NA	C/C	1,0	C/A	4,46	C/A	37,27	A|A	0,4	NA
Chr02	24756184	A	G	INTERGENIC	NA	A/A	1,0	A/G	2,46	A/G	37,27	G|G	0,4	NA
Chr02	24756203	G	A	INTERGENIC	NA	G/G	3,0	G/A	2,46	G/A	39,23	A|A	0,4	NA
Chr02	24756274	C	T	INTERGENIC	NA	C/C	3,0	C/T	2,46	C/T	39,13	T|T	0,3	NA
Chr02	24756300	T	C	INTERGENIC	NA	T/T	4,0	T/C	1,49	T/C	35,19	C/C	0,5	NA
Chr02	24756337	A	C	INTERGENIC	NA	A/A	4,0	A/C	4,58	A/C	47,21	C/C	0,3	NA
Chr02	24756370	T	G	INTERGENIC	NA	T/T	2,0	T/G	1,55	T/G	39,23	G/G	0,4	NA
Chr02	24756446	A	T	INTERGENIC	NA	A/A	3,0	A/T	3,57	A/T	41,25	T|T	0,6	NA
Chr02	24756464	A	C	INTERGENIC	NA	A/A	3,0	A/C	5,57	A/C	41,25	C/C	0,7	NA
Chr02	24756502	T	C	INTERGENIC	NA	T/T	4,0	T/C	3,57	T/C	42,26	C/C	0,5	NA
Chr02	24756548	C	T	INTERGENIC	NA	C/C	4,0	C/T	4,56	C/T	41,25	T|T	0,10	NA
Chr02	24756573	T	C	INTERGENIC	NA	T/T	5,0	T/C	4,56	T/C	43,25	C|C	0,10	NA
Chr02	24756622	C	T	INTERGENIC	NA	C/C	8,0	C/T	2,68	C/T	41,29	T/T	0,10	NA
Chr02	24756654	C	T	INTERGENIC	NA	C/C	8,0	C/T	2,66	C/T	41,27	T/T	0,12	NA
Chr02	24756681	G	C	INTERGENIC	NA	G/G	7,0	G/C	30,42	G/C	50,20	C/C	0,10	NA
Chr02	24756692	A	G	INTERGENIC	NA	A/A	7,0	A/G	2,64	A/G	42,28	G|G	0,9	NA
Chr02	24756697	A	C	INTERGENIC	NA	A/A	7,0	A/C	2,64	A/C	40,28	C|C	0,8	NA
Chr02	24756716	A	C	INTERGENIC	NA	A/A	4,0	A/C	1,65	A/C	43,27	C|C	0,9	NA
Chr02	24756718	G	A	INTERGENIC	NA	G/G	2,0	G/A	1,65	G/A	43,27	A|A	0,9	NA
Chr02	24756749	A	G	INTERGENIC	NA	A/A	2,0	A/G	3,63	A/G	41,31	G/G	0,10	NA
Chr02	24756769	G	C	INTERGENIC	NA	G/G	1,0	G/C	3,63	G/C	40,30	C/C	0,11	NA
Chr02	24756803	G	A	INTERGENIC	NA	G/G	1,0	G/A	3,61	G/A	45,23	A|A	0,8	NA
Chr02	24756805	T	G	INTERGENIC	NA	T/T	1,0	T/G	3,61	T/G	43,23	G|G	0,8	NA
Chr02	24756818	G	C	INTERGENIC	NA	G/G	1,0	G/C	3,55	G/C	48,20	C|C	0,6	NA
Chr02	24756824	T	C	INTERGENIC	NA	T/T	1,0	T/C	2,54	T/C	46,20	C|C	0,6	NA
Chr02	24756861	A	C	INTERGENIC	NA	A/A	2,0	A/C	3,39	A/C	48,14	C|C	0,6	NA
Chr02	24756862	C	A	INTERGENIC	NA	C/C	2,0	C/A	3,39	C/A	48,14	A|A	0,6	NA
Chr02	24756894	T	A	INTERGENIC	NA	T/T	3,0	T/A	3,11	T/A	51,5	A/A	0,2	NA
Chr02	24758764	C	A	INTERGENIC	NA	C/C	5,0	C/A	14,6	C/A	62,4	A/A	0,2	NA
Chr02	24759669	G	A	INTERGENIC	NA	G/G	5,0	G/A	6,22	G/A	45,7	A|A	0,1	NA
Chr02	24759689	A	G	INTERGENIC	NA	A/A	4,0	A/G	4,22	A/G	45,7	G|G	0,1	NA
Chr02	24759698	C	A	INTERGENIC	NA	C/C	4,0	C/A	2,20	C/A	48,6	A|A	0,1	NA
Chr02	24759711	A	C	INTERGENIC	NA	A/A	4,0	A/C	2,20	A/C	50,6	C|C	0,2	NA
Chr02	24759717	T	A	INTERGENIC	NA	T/T	4,0	T/A	4,20	T/A	50,6	A|A	0,2	NA
Chr02	24759731	C	T	INTERGENIC	NA	C/C	3,0	C/T	2,18	C/T	47,9	T|T	0,3	NA
Chr02	24759797	A	G	INTERGENIC	NA	A/A	4,0	A/G	4,42	A/G	43,21	G|G	0,4	NA
Chr02	24759832	T	C	INTERGENIC	NA	T/T	4,0	T/C	3,43	T/C	39,21	C|C	0,5	NA
Chr02	24759845	A	G	INTERGENIC	NA	A/A	4,0	A/G	3,43	A/G	39,21	G|G	0,8	NA
Chr02	24759866	G	A	INTERGENIC	NA	G/G	4,0	G/A	3,45	G/A	41,23	A|A	0,9	NA
Chr02	24759930	A	G	INTERGENIC	NA	A/A	2,0	A/G	17,29	A/G	51,17	G/G	0,1	NA
Chr02	24759968	C	A	INTERGENIC	NA	C/C	2,0	C/A	3,41	C/A	37,27	A|A	0,2	NA
Chr02	24759999	T	G	INTERGENIC	NA	T/T	2,0	T/G	2,42	T/G	34,32	G|G	0,3	NA
Chr02	24760035	G	C	INTERGENIC	NA	G/G	2,0	G/C	2,50	G/C	34,28	C/C	0,6	NA
Chr02	24760119	G	A	INTERGENIC	NA	G/G	3,0	G/A	1,61	G/A	35,31	A|A	0,8	NA
Chr02	24760124	T	C	INTERGENIC	NA	T/T	3,0	T/C	1,61	T/C	37,31	C|C	0,8	NA
Chr02	24760160	C	T	INTERGENIC	NA	C/C	3,0	C/T	1,59	C/T	36,30	T|T	0,7	NA
Chr02	24760162	G	A	INTERGENIC	NA	G/G	3,0	G/A	1,59	G/A	36,30	A|A	0,7	NA
Chr02	24760179	A	T	INTERGENIC	NA	A/A	4,0	A/T	1,55	A/T	37,27	T|T	0,5	NA
Chr02	24760182	G	A	INTERGENIC	NA	G/G	4,0	G/A	1,55	G/A	39,27	A|A	0,5	NA
Chr02	24760195	T	A	INTERGENIC	NA	T/T	4,0	T/A	1,51	T/A	42,24	A|A	0,8	NA
Chr02	24760197	G	A	INTERGENIC	NA	G/G	2,0	G/A	1,51	G/A	42,24	A|A	0,8	NA
Chr02	24760210	G	A	INTERGENIC	NA	G/G	2,0	A/A	0,50	G/A	42,24	A|A	0,5	NA
Chr02	24760226	A	G	INTERGENIC	NA	A/A	3,0	G/G	0,50	A/G	44,24	G|G	0,5	NA
Chr02	24760244	G	C	INTERGENIC	NA	G/G	3,0	C/C	0,46	G/C	41,23	C|C	0,6	NA
Chr02	24760294	T	C	INTERGENIC	NA	T/T	5,0	T/C	1,61	T/C	40,28	C|C	0,5	NA
Chr02	24760295	G	A	INTERGENIC	NA	G/G	5,0	G/A	1,61	G/A	40,28	A|A	0,5	NA
Chr02	24760303	T	C	INTERGENIC	NA	T/T	4,0	T/C	1,61	T/C	40,28	C|C	0,5	NA
Chr02	24760343	T	A	INTERGENIC	NA	T/T	4,0	T/A	2,66	T/A	42,28	A/A	0,4	NA
Chr02	24760410	T	C	INTERGENIC	NA	T/T	3,0	T/C	3,63	T/C	39,31	C|C	0,6	NA
Chr02	24760418	T	C	INTERGENIC	NA	T/T	3,0	T/C	2,64	T/C	39,31	C|C	0,6	NA
Chr02	24760504	G	T	INTERGENIC	NA	G/G	4,0	G/T	2,62	G/T	32,32	T/T	0,9	NA
Chr02	24760572	G	A	INTERGENIC	NA	G/G	5,0	G/A	2,68	G/A	33,35	A/A	0,9	NA
Chr02	24760593	T	G	INTERGENIC	NA	T/T	7,0	T/G	2,68	T/G	36,34	G|G	0,9	NA
Chr02	24760600	G	C	INTERGENIC	NA	G/G	8,0	G/C	3,67	G/C	36,34	C|C	0,11	NA
Chr02	24760625	C	T	INTERGENIC	NA	C/C	8,0	C/T	2,70	C/T	35,33	T/T	0,12	NA
Chr02	24760637	C	A	INTERGENIC	NA	C/C	8,0	C/A	2,70	C/A	36,32	A/A	0,11	NA
Chr02	24760651	T	G	INTERGENIC	NA	T/T	8,0	T/G	2,70	T/G	38,32	G|G	0,10	NA
Chr02	24760652	G	T	INTERGENIC	NA	G/G	8,0	G/T	2,70	G/T	38,32	T|T	0,10	NA
Chr02	24760657	C	A	INTERGENIC	NA	C/C	8,0	C/A	2,70	C/A	36,32	A|A	0,10	NA
Chr02	24760701	A	C	INTERGENIC	NA	A/A	7,0	A/C	3,67	A/C	36,36	C/C	0,12	NA
Chr02	24760755	T	A	INTERGENIC	NA	T/T	2,0	T/A	3,65	T/A	36,36	A|A	0,15	NA
Chr02	24760763	A	G	INTERGENIC	NA	A/A	2,0	A/G	3,65	A/G	36,36	G|G	0,14	NA
Chr02	24760892	T	G	INTERGENIC	NA	T/T	3,0	T/G	3,55	T/G	35,37	G|G	0,9	NA
Chr02	24760896	C	T	INTERGENIC	NA	C/C	3,0	C/T	3,55	C/T	36,34	T|T	0,8	NA
Chr02	24760984	T	A	INTERGENIC	NA	T/T	3,0	T/A	4,56	T/A	34,34	A|A	0,6	NA
Chr02	24761005	G	A	INTERGENIC	NA	G/G	3,0	G/A	2,56	G/A	34,32	A|A	0,6	NA
Chr02	24761030	G	A	INTERGENIC	NA	G/G	3,0	G/A	25,37	G/A	49,21	A|A	0,6	NA
Chr02	24761032	T	A	INTERGENIC	NA	T/T	3,0	T/A	2,56	T/A	32,36	A|A	0,6	NA
Chr02	24761043	A	T	INTERGENIC	NA	A/A	4,0	A/T	2,54	A/T	33,37	T|T	0,6	NA
Chr02	24761154	G	C	INTERGENIC	NA	G/G	3,0	G/C	2,62	G/C	40,32	C|C	0,8	NA
Chr02	24761155	T	A	INTERGENIC	NA	T/T	3,0	T/A	2,62	T/A	40,32	A|A	0,8	NA
Chr02	24761177	G	T	INTERGENIC	NA	G/G	3,0	G/T	2,64	G/T	39,33	T|T	0,9	NA
Chr02	24761226	C	T	INTERGENIC	NA	C/C	1,0	C/T	2,64	C/T	40,30	T/T	0,6	NA
Chr02	24761245	A	G	INTERGENIC	NA	A/A	1,0	A/G	25,43	A/G	56,16	G|G	0,5	NA
Chr02	24761488	T	C	INTERGENIC	NA	T/T	1,0	T/C	3,67	T/C	40,30	C/C	0,11	NA
Chr02	24761528	A	T	INTERGENIC	NA	A/A	2,0	A/T	28,44	A/T	54,18	T|T	0,7	NA
Chr02	24761537	G	T	INTERGENIC	NA	G/G	2,0	G/T	3,63	G/T	37,29	T|T	0,7	NA
Chr02	24761538	A	C	INTERGENIC	NA	A/A	2,0	A/C	3,63	A/C	39,29	C|C	0,7	NA
Chr02	24761563	G	C	INTERGENIC	NA	G/G	2,0	G/C	3,63	G/C	38,30	C/C	0,8	NA
Chr02	24761619	A	C	INTERGENIC	NA	A/A	2,0	A/C	1,55	A/C	36,26	C|C	0,7	NA
Chr02	24761641	T	C	INTERGENIC	NA	T/T	1,0	T/C	1,53	T/C	40,24	C|C	0,8	NA
Chr02	24761674	G	A	INTERGENIC	NA	G/G	1,0	G/A	1,51	G/A	39,23	A|A	0,9	NA
Chr02	24761685	G	A	INTERGENIC	NA	G/G	2,0	G/A	1,51	G/A	38,22	A|A	0,9	NA
Chr02	24761700	A	C	INTERGENIC	NA	A/A	2,0	A/C	1,53	A/C	40,22	C|C	0,12	NA
Chr02	24761733	T	C	INTERGENIC	NA	T/T	3,0	T/C	2,54	T/C	40,26	C|C	0,12	NA
Chr02	24761735	A	C	INTERGENIC	NA	A/A	3,0	A/C	1,55	A/C	38,26	C|C	0,12	NA
Chr02	24761744	T	G	INTERGENIC	NA	T/T	3,0	T/G	1,55	T/G	40,26	G|G	0,11	NA
Chr02	24761858	T	C	INTERGENIC	NA	T/T	3,0	T/C	3,63	T/C	33,35	C|C	0,11	NA
Chr02	24761872	G	T	INTERGENIC	NA	G/G	2,0	G/T	3,63	G/T	34,34	T|T	0,13	NA
Chr02	24761901	T	G	INTERGENIC	NA	T/T	3,0	T/G	3,59	T/G	32,36	G|G	0,14	NA
Chr02	24761902	G	C	INTERGENIC	NA	G/G	3,0	G/C	3,59	G/C	32,36	C|C	0,14	NA
Chr02	24761912	T	A	INTERGENIC	NA	T/T	3,0	T/A	3,59	T/A	30,38	A|A	0,13	NA
Chr02	24761931	A	C	INTERGENIC	NA	A/A	3,0	A/C	3,59	A/C	34,36	C|C	0,11	NA
Chr02	24761949	T	C	INTERGENIC	NA	T/T	3,0	T/C	1,57	T/C	32,36	C|C	0,11	NA
Chr02	24761969	C	T	INTERGENIC	NA	C/C	1,0	C/T	3,59	C/T	30,36	T|T	0,12	NA
Chr02	24761994	T	A	INTERGENIC	NA	T/T	1,0	T/A	3,59	T/A	33,35	A|A	0,11	NA
Chr02	24762020	T	C	INTERGENIC	NA	T/T	1,0	T/C	2,64	T/C	37,33	C/C	0,9	NA
Chr02	24762114	T	C	INTERGENIC	NA	T/T	1,0	T/C	2,64	T/C	40,32	C|C	0,12	NA
Chr02	24762115	C	G	INTERGENIC	NA	C/C	1,0	C/G	2,64	C/G	40,32	G|G	0,13	NA
Chr02	24762121	C	A	INTERGENIC	NA	C/C	1,0	C/A	3,63	C/A	41,31	A|A	0,12	NA
Chr02	24762137	A	C	INTERGENIC	NA	A/A	1,0	A/C	2,64	A/C	40,32	C/C	0,11	NA
Chr02	24762264	A	G	INTERGENIC	NA	A/A	4,0	A/G	2,64	A/G	38,32	G/G	0,5	NA
Chr02	24762312	A	G	INTERGENIC	NA	A/A	7,0	A/G	1,61	A/G	34,34	G/G	0,5	NA
Chr02	24762377	C	G	INTERGENIC	NA	C/C	5,0	C/G	2,60	C/G	32,36	G/G	0,10	NA
Chr02	24762416	G	C	INTERGENIC	NA	G/G	3,0	G/C	2,64	G/C	29,37	C/C	0,12	NA
Chr02	24762509	A	G	INTERGENIC	NA	A/A	6,0	A/G	3,65	A/G	30,38	G|G	0,11	NA
Chr02	24762514	A	G	INTERGENIC	NA	A/A	7,0	A/G	3,65	A/G	30,38	G|G	0,11	NA
Chr02	24762551	G	C	INTERGENIC	NA	G/G	6,0	G/C	2,68	G/C	31,37	C/C	0,10	NA
Chr02	24762580	T	C	INTERGENIC	NA	T/T	8,0	T/C	2,66	T/C	33,37	C/C	0,9	NA
Chr02	24762625	C	A	INTERGENIC	NA	C/C	5,0	C/A	2,58	C/A	35,35	A|A	0,8	NA
Chr02	24762628	C	A	INTERGENIC	NA	C/C	5,0	C/A	2,58	C/A	35,35	A|A	0,8	NA
Chr02	24762645	T	G	INTERGENIC	NA	T/T	6,0	T/G	2,56	T/G	38,34	G/G	0,6	NA
Chr02	24762708	G	T	INTERGENIC	NA	G/G	3,0	G/T	27,41	G/T	54,18	T|T	0,6	NA
Chr02	24762716	T	C	INTERGENIC	NA	T/T	3,0	T/C	3,59	T/C	37,33	C|C	0,7	NA
Chr02	24762758	G	A	INTERGENIC	NA	G/G	3,0	G/A	2,62	G/A	33,35	A|A	0,10	NA
Chr02	24762771	G	A	INTERGENIC	NA	G/G	4,0	G/A	2,62	G/A	33,35	A|A	0,10	NA
Chr02	24762777	T	C	INTERGENIC	NA	T/T	4,0	T/C	4,62	T/C	33,35	C|C	0,11	NA
Chr02	24762787	C	T	INTERGENIC	NA	C/C	3,0	C/T	2,62	C/T	33,35	T|T	0,12	NA
Chr02	24762791	C	T	INTERGENIC	NA	C/C	3,0	C/T	2,60	C/T	33,35	T|T	0,12	NA
Chr02	24763018	C	T	INTERGENIC	NA	C/C	5,0	C/T	25,47	C/T	37,33	T|T	0,5	NA
Chr02	24763024	C	T	INTERGENIC	NA	C/C	5,0	C/T	25,47	C/T	38,32	T|T	0,5	NA
Chr02	24763054	T	A	INTERGENIC	NA	T/T	4,0	T/A	12,52	T/A	37,33	A|A	0,5	NA
Chr02	24763078	T	A	INTERGENIC	NA	T/T	6,0	T/A	3,59	T/A	30,36	A|A	0,4	NA
Chr02	24763117	G	A	INTERGENIC	NA	G/G	4,0	G/A	1,57	G/A	35,31	A|A	0,5	NA
Chr02	24763131	A	C	INTERGENIC	NA	A/A	3,0	A/C	1,59	A/C	41,27	C|C	0,5	NA
Chr02	24763135	A	C	INTERGENIC	NA	A/A	3,0	A/C	1,59	A/C	40,28	C|C	0,5	NA
Chr02	24763269	A	G	INTERGENIC	NA	A/A	2,0	A/G	3,59	A/G	35,33	G/G	0,7	NA
Chr02	24763282	T	C	INTERGENIC	NA	T/T	1,0	T/C	3,61	T/C	35,35	C|C	0,8	NA
Chr02	24763287	A	G	INTERGENIC	NA	A/A	1,0	A/G	6,60	A/G	35,35	G|G	0,8	NA
Chr02	24763288	A	G	INTERGENIC	NA	A/A	1,0	A/G	3,61	A/G	35,35	G|G	0,8	NA
Chr02	24763300	A	G	INTERGENIC	NA	A/A	1,0	A/G	4,62	A/G	38,32	G/G	0,8	NA
Chr02	24763338	A	G	INTERGENIC	NA	A/A	1,0	A/G	4,58	A/G	38,32	G|G	0,6	NA
Chr02	24763341	T	C	INTERGENIC	NA	T/T	1,0	T/C	4,58	T/C	38,32	C|C	0,6	NA
Chr02	24763367	A	G	INTERGENIC	NA	A/A	1,0	A/G	4,68	A/G	41,31	G/G	0,5	NA
Chr02	24763394	C	A	INTERGENIC	NA	C/C	4,0	C/A	4,66	C/A	41,29	A/A	0,6	NA
Chr02	24763405	C	A	INTERGENIC	NA	C/C	4,0	C/A	3,65	C/A	40,32	A/A	0,4	NA
Chr02	24763416	C	A	INTERGENIC	NA	C/C	4,0	C/A	3,63	C/A	40,32	A/A	0,4	NA
Chr02	24763430	A	G	INTERGENIC	NA	A/A	4,0	A/G	2,64	A/G	38,32	G/G	0,3	NA
Chr02	24763461	C	T	INTERGENIC	NA	C/C	3,0	C/T	2,62	C/T	41,29	T|T	0,3	NA
Chr02	24763466	C	T	INTERGENIC	NA	C/C	4,0	C/T	2,62	C/T	40,30	T|T	0,3	NA
Chr02	24763505	G	A	INTERGENIC	NA	G/G	5,0	G/A	1,65	G/A	41,29	A/A	0,3	NA
Chr02	24763518	T	A	INTERGENIC	NA	T/T	6,0	T/A	1,69	T/A	38,32	A/A	0,4	NA
Chr02	24763535	T	A	INTERGENIC	NA	T/T	4,0	T/A	1,69	T/A	39,31	A|A	0,2	NA
Chr02	24763537	C	A	INTERGENIC	NA	C/C	4,0	C/A	1,69	C/A	39,31	A|A	0,2	NA
Chr02	24763644	A	T	INTERGENIC	NA	A/A	4,0	A/T	2,66	A/T	39,31	T/T	0,7	NA
Chr02	24763696	A	G	INTERGENIC	NA	A/A	3,0	A/G	3,65	A/G	33,35	G/G	1,8	NA
Chr02	24763716	A	T	INTERGENIC	NA	A/A	3,0	A/T	3,65	A/T	38,32	T/T	0,7	NA
Chr02	24763733	C	T	INTERGENIC	NA	C/C	3,0	C/T	3,65	C/T	42,30	T/T	0,10	NA
Chr02	24763800	C	T	INTERGENIC	NA	C/C	3,0	C/T	2,58	C/T	37,35	T|T	0,13	NA
Chr02	24763810	A	T	INTERGENIC	NA	A/A	4,0	A/T	2,58	A/T	36,36	T|T	0,13	NA
Chr02	24763842	A	G	INTERGENIC	NA	A/A	5,0	A/G	2,56	A/G	35,33	G/G	0,8	NA
Chr02	24763944	T	C	INTERGENIC	NA	T/T	6,0	T/C	2,60	T/C	40,32	C/C	0,7	NA
Chr02	24763981	C	A	INTERGENIC	NA	C/C	3,0	C/A	2,60	C/A	42,30	A|A	0,8	NA
Chr02	24763994	C	T	INTERGENIC	NA	C/C	2,0	C/T	2,60	C/T	37,35	T|T	0,8	NA
Chr02	24764016	T	C	INTERGENIC	NA	T/T	2,0	T/C	2,60	T/C	34,32	C|C	0,7	NA
Chr02	24764061	T	C	INTERGENIC	NA	T/T	1,0	T/C	2,68	T/C	37,33	C/C	0,7	NA
Chr02	24764104	A	G	INTERGENIC	NA	A/A	1,0	A/G	23,43	A/G	43,29	G|G	0,6	NA
Chr02	24764111	A	G	INTERGENIC	NA	A/A	1,0	A/G	2,66	A/G	40,32	G|G	0,6	NA
Chr02	24764146	G	T	INTERGENIC	NA	G/G	1,0	G/T	2,66	G/T	34,30	T|T	0,10	NA
Chr02	24764153	T	A	INTERGENIC	NA	T/T	1,0	T/A	2,66	T/A	34,30	A|A	0,11	NA
Chr02	24764199	A	C	INTERGENIC	NA	A/A	1,0	A/C	1,59	A/C	40,32	C/C	0,13	NA
Chr02	24764218	C	A	INTERGENIC	NA	C/C	1,0	C/A	1,55	C/A	36,34	A|A	0,14	NA
Chr02	24764222	T	A	INTERGENIC	NA	T/T	1,0	T/A	1,55	T/A	34,34	A|A	0,13	NA
Chr02	24764261	G	A	INTERGENIC	NA	G/G	1,0	G/A	1,55	G/A	35,33	A/A	0,13	NA
Chr02	24764273	G	T	INTERGENIC	NA	G/G	1,0	G/T	3,53	G/T	36,32	T/T	0,12	NA
Chr02	24764302	T	A	INTERGENIC	NA	T/T	2,0	T/A	6,56	T/A	37,33	A/A	0,10	NA
Chr02	24764328	T	C	INTERGENIC	NA	T/T	3,0	T/C	3,63	T/C	33,37	C|C	0,10	NA
Chr02	24764334	C	T	INTERGENIC	NA	C/C	3,0	C/T	12,56	C/T	32,38	T|T	0,11	NA
Chr02	24764362	A	G	INTERGENIC	NA	A/A	2,0	A/G	3,59	A/G	32,40	G|G	0,10	NA
Chr02	24764371	G	A	INTERGENIC	NA	G/G	2,0	G/A	10,54	G/A	34,38	A|A	0,9	NA
Chr02	24764374	C	T	INTERGENIC	NA	C/C	2,0	C/T	10,54	C/T	34,38	T|T	0,8	NA
Chr02	24764394	A	G	INTERGENIC	NA	A/A	3,0	A/G	5,55	A/G	39,31	G/G	0,6	NA
Chr02	24764447	C	T	INTERGENIC	NA	C/C	3,0	C/T	3,53	C/T	34,30	T/T	0,8	NA
Chr02	24764533	T	C	INTERGENIC	NA	T/T	1,0	T/C	3,57	T/C	35,27	C/C	0,5	NA
Chr02	24764584	C	T	INTERGENIC	NA	C/C	1,0	C/T	4,60	C/T	37,29	T/T	0,6	NA
Chr02	24764636	A	C	INTERGENIC	NA	A/A	4,0	A/C	2,60	A/C	31,33	C/C	0,6	NA
Chr02	24764738	C	A	INTERGENIC	NA	C/C	2,0	C/A	3,45	C/A	38,28	A/A	0,4	NA
Chr02	24764783	G	C	INTERGENIC	NA	G/G	2,0	G/C	3,47	G/C	40,28	C/C	0,7	NA
Chr02	24764825	C	A	INTERGENIC	NA	C/C	1,0	C/A	1,45	C/A	39,29	A/A	0,5	NA
Chr02	24764854	A	T	INTERGENIC	NA	A/A	2,0	A/T	1,49	A/T	42,28	T/T	0,5	NA
Chr02	24764913	A	C	INTERGENIC	NA	A/A	4,0	A/C	3,43	A/C	41,27	C/C	0,10	NA
Chr02	24764929	T	C	INTERGENIC	NA	T/T	5,0	T/C	1,41	T/C	39,29	C/C	0,8	NA
Chr02	24764997	T	C	INTERGENIC	NA	T/T	6,0	T/C	2,40	T/C	32,26	C|C	0,10	NA
Chr02	24765000	T	C	INTERGENIC	NA	T/T	6,0	T/C	2,40	T/C	34,26	C|C	0,10	NA
Chr02	24765002	G	T	INTERGENIC	NA	G/G	6,0	G/T	19,29	G/T	48,18	T|T	0,11	NA
Chr02	24765022	C	T	INTERGENIC	NA	C/C	4,0	C/T	2,36	C/T	35,27	T|T	0,10	NA
Chr02	24765026	A	G	INTERGENIC	NA	A/A	4,0	A/G	2,36	A/G	31,27	G|G	0,10	NA
Chr02	24765030	A	C	INTERGENIC	NA	A/A	4,0	A/C	2,36	A/C	31,29	C|C	0,9	NA
Chr02	24765043	G	A	INTERGENIC	NA	G/G	4,0	G/A	2,34	G/A	33,25	A|A	0,8	NA
Chr02	24765048	T	A	INTERGENIC	NA	T/T	4,0	T/A	4,34	T/A	35,25	A|A	0,7	NA
Chr02	24765075	G	C	INTERGENIC	NA	G/G	3,0	G/C	2,36	G/C	39,23	C|C	0,7	NA
Chr02	24765081	G	A	INTERGENIC	NA	G/G	3,0	G/A	2,36	G/A	39,23	A|A	0,7	NA
Chr02	24765082	C	A	INTERGENIC	NA	C/C	3,0	C/A	2,36	C/A	39,23	A|A	0,7	NA
Chr02	24765128	T	C	INTERGENIC	NA	T/T	2,0	T/C	2,44	T/C	36,24	C|C	0,9	NA
Chr02	24765129	A	T	INTERGENIC	NA	A/A	2,0	A/T	2,44	A/T	36,24	T|T	0,9	NA
Chr02	24765137	A	G	INTERGENIC	NA	A/A	2,0	A/G	2,44	A/G	37,25	G|G	0,9	NA
Chr02	24765138	A	G	INTERGENIC	NA	A/A	2,0	A/G	2,44	A/G	37,25	G|G	0,9	NA
Chr02	24765150	A	C	INTERGENIC	NA	A/A	3,0	A/C	3,41	A/C	34,26	C|C	0,8	NA
Chr02	24765151	G	C	INTERGENIC	NA	G/G	3,0	G/C	3,41	G/C	34,26	C|C	0,8	NA
Chr02	24765154	T	A	INTERGENIC	NA	T/T	2,0	T/A	3,41	T/A	38,26	A|A	0,8	NA
Chr02	24765160	C	T	INTERGENIC	NA	C/C	2,0	C/T	3,41	C/T	34,26	T|T	0,7	NA
Chr02	24765177	A	C	INTERGENIC	NA	A/A	2,0	A/C	3,41	A/C	36,26	C|C	0,7	NA
Chr02	24765186	T	C	INTERGENIC	NA	T/T	2,0	T/C	3,41	T/C	36,26	C|C	0,7	NA
Chr02	24765214	C	T	INTERGENIC	NA	C/C	2,0	C/T	5,37	C/T	40,26	T/T	0,7	NA
Chr02	24765281	G	T	INTERGENIC	NA	G/G	3,0	G/T	2,40	G/T	44,24	T|T	0,2	NA
Chr02	24765291	A	G	INTERGENIC	NA	A/A	2,0	A/G	2,40	A/G	44,24	G|G	0,2	NA
Chr02	24765292	G	A	INTERGENIC	NA	G/G	2,0	G/A	2,40	G/A	44,24	A|A	0,2	NA
Chr02	24765345	T	C	INTERGENIC	NA	T/T	3,0	T/C	2,58	T/C	39,31	C/C	0,3	NA
Chr02	24765379	T	A	INTERGENIC	NA	T/T	4,0	T/A	2,60	T/A	40,30	A|A	0,4	NA
Chr02	24765383	C	T	INTERGENIC	NA	C/C	2,0	C/T	2,60	C/T	37,29	T|T	0,4	NA
Chr02	24765437	C	T	INTERGENIC	NA	C/C	2,0	C/T	2,56	C/T	34,36	T|T	0,4	NA
Chr02	24765451	A	G	INTERGENIC	NA	A/A	3,0	A/G	3,55	A/G	37,33	G|G	0,7	NA
Chr02	24765510	A	C	INTERGENIC	NA	A/A	2,0	A/C	2,66	A/C	36,34	C|C	0,8	NA
Chr02	24765515	C	T	INTERGENIC	NA	C/C	2,0	C/T	2,66	C/T	35,35	T|T	0,8	NA
Chr02	24765537	G	A	INTERGENIC	NA	G/G	3,0	G/A	3,67	G/A	34,34	A|A	0,6	NA
Chr02	24765543	A	T	INTERGENIC	NA	A/A	3,0	A/T	3,67	A/T	34,34	T|T	0,6	NA
Chr02	24765550	G	T	INTERGENIC	NA	G/G	3,0	G/T	3,67	G/T	36,34	T|T	0,6	NA
Chr02	24765559	A	G	INTERGENIC	NA	A/A	3,0	A/G	3,65	A/G	36,34	G|G	0,6	NA
Chr02	24765584	T	C	INTERGENIC	NA	T/T	4,0	T/C	3,57	T/C	39,31	C|C	0,6	NA
Chr02	24765592	A	G	INTERGENIC	NA	A/A	3,0	A/G	3,57	A/G	39,29	G|G	0,8	NA
Chr02	24765620	C	G	INTERGENIC	NA	C/C	4,0	C/G	3,59	C/G	39,29	G|G	0,7	NA
Chr02	24765625	T	C	INTERGENIC	NA	T/T	4,0	T/C	3,59	T/C	40,30	C|C	0,7	NA
Chr02	24765637	G	C	INTERGENIC	NA	G/G	5,0	G/C	3,59	G/C	36,34	C/C	0,8	NA
Chr02	24765656	T	C	INTERGENIC	NA	T/T	5,0	T/C	3,63	T/C	36,32	C/C	0,7	NA
Chr02	24765711	C	A	INTERGENIC	NA	C/C	6,0	C/A	3,67	C/A	39,33	A/A	0,11	NA
Chr02	24765728	C	T	INTERGENIC	NA	C/C	6,0	C/T	3,71	C/T	35,35	T|T	0,11	NA
Chr02	24765738	T	C	INTERGENIC	NA	T/T	6,0	T/C	3,69	T/C	37,33	C|C	0,10	NA
Chr02	24765745	G	A	INTERGENIC	NA	G/G	6,0	G/A	3,69	G/A	38,32	A|A	0,9	NA
Chr02	24765764	G	A	INTERGENIC	NA	G/G	5,0	G/A	3,67	G/A	37,33	A/A	0,10	NA
Chr02	24765782	G	C	INTERGENIC	NA	G/G	5,0	G/C	3,67	G/C	37,33	C|C	0,13	NA
Chr02	24765784	T	C	INTERGENIC	NA	T/T	5,0	T/C	3,67	T/C	37,33	C|C	0,13	NA
Chr02	24765805	T	G	INTERGENIC	NA	T/T	6,0	T/G	1,69	T/G	35,35	G/G	0,14	NA
Chr02	24765838	C	T	INTERGENIC	NA	C/C	4,0	C/T	1,71	C/T	35,33	T/T	0,16	NA
Chr02	24765864	C	T	INTERGENIC	NA	C/C	3,0	C/T	2,66	C/T	36,34	T|T	0,12	NA
Chr02	24765875	A	G	INTERGENIC	NA	A/A	3,0	A/G	2,64	A/G	33,35	G|G	0,13	NA
Chr02	24765878	T	C	INTERGENIC	NA	T/T	3,0	T/C	2,64	T/C	33,35	C|C	0,13	NA
Chr02	24765898	T	C	INTERGENIC	NA	T/T	3,0	T/C	2,64	T/C	34,34	C|C	0,13	NA
Chr02	24765914	C	T	INTERGENIC	NA	C/C	2,0	C/T	2,64	C/T	34,34	T|T	0,14	NA
Chr02	24765915	T	C	INTERGENIC	NA	T/T	2,0	T/C	2,64	T/C	34,34	C|C	0,14	NA
Chr02	24765933	G	A	INTERGENIC	NA	G/G	2,0	G/A	2,62	G/A	34,34	A|A	0,12	NA
Chr02	24765937	A	G	INTERGENIC	NA	A/A	2,0	A/G	2,62	A/G	33,35	G|G	0,12	NA
Chr02	24765946	A	G	INTERGENIC	NA	A/A	2,0	A/G	2,62	A/G	34,34	G|G	0,12	NA
Chr02	24765950	G	A	INTERGENIC	NA	G/G	2,0	G/A	2,62	G/A	34,34	A|A	0,13	NA
Chr02	24765999	G	A	INTERGENIC	NA	G/G	3,0	G/A	2,66	G/A	34,36	A|A	0,14	NA
Chr02	24766022	G	T	INTERGENIC	NA	G/G	4,0	G/T	2,66	G/T	30,38	T|T	0,12	NA
Chr02	24766023	A	C	INTERGENIC	NA	A/A	4,0	A/C	2,66	A/C	30,38	C|C	0,12	NA
Chr02	24766062	G	C	INTERGENIC	NA	G/G	6,0	G/C	2,70	G/C	34,34	C|C	0,12	NA
Chr02	24766083	T	G	INTERGENIC	NA	T/T	6,0	T/G	2,68	T/G	33,33	G|G	0,12	NA
Chr02	24766089	A	G	INTERGENIC	NA	A/A	6,0	A/G	2,68	A/G	33,33	G|G	0,11	NA
Chr02	24766096	T	C	INTERGENIC	NA	T/T	8,0	T/C	2,68	T/C	35,33	C|C	0,12	NA
Chr02	24766141	G	C	INTERGENIC	NA	G/G	5,0	G/C	2,68	G/C	33,39	C|C	0,15	NA
Chr02	24766175	T	C	INTERGENIC	NA	T/T	6,0	T/C	2,66	T/C	31,37	C/C	0,13	NA
Chr02	24766233	C	T	INTERGENIC	NA	C/C	6,0	C/T	1,59	C/T	27,39	T|T	0,14	NA
Chr02	24766321	G	A	INTERGENIC	NA	G/G	5,0	G/A	3,45	G/A	32,32	A|A	0,14	NA
Chr02	24766328	G	C	INTERGENIC	NA	G/G	5,0	G/C	5,45	G/C	28,34	C|C	0,13	NA
Chr02	24766372	C	A	INTERGENIC	NA	C/C	5,0	C/A	4,46	C/A	26,30	A|A	0,7	NA
Chr02	24766375	G	T	INTERGENIC	NA	G/G	2,0	G/T	2,46	G/T	27,29	T|T	0,7	NA
Chr02	24766464	C	T	INTERGENIC	NA	C/C	1,0	T/T	0,24	C/T	12,12	T|T	0,14	NA
Chr02	24766473	T	A	INTERGENIC	NA	T/T	1,0	T/A	2,24	T/A	20,12	A|A	0,13	NA
Chr02	24766694	T	C	INTERGENIC	NA	T/T	2,0	T/C	3,61	T/C	35,35	C|C	0,15	NA
Chr02	24766695	G	A	INTERGENIC	NA	G/G	2,0	G/A	5,61	G/A	35,35	A|A	0,15	NA
Chr02	24766738	C	T	INTERGENIC	NA	C/C	2,0	C/T	3,63	C/T	33,39	T|T	0,14	NA
Chr02	24766748	C	T	INTERGENIC	NA	C/C	2,0	C/T	3,61	C/T	31,41	T|T	0,15	NA
Chr02	24766763	C	T	INTERGENIC	NA	C/C	2,0	C/T	2,62	C/T	32,40	T|T	0,16	NA
Chr02	24766770	G	T	INTERGENIC	NA	G/G	2,0	G/T	2,62	G/T	32,40	T|T	0,14	NA
Chr02	24766816	G	A	INTERGENIC	NA	G/G	3,0	G/A	1,65	G/A	29,39	A|A	0,11	NA
Chr02	24766850	T	G	INTERGENIC	NA	T/T	2,0	T/G	4,68	T/G	30,38	G|G	0,16	NA
Chr02	24766883	G	A	INTERGENIC	NA	G/G	2,0	G/A	3,67	G/A	29,37	A|A	0,14	NA
Chr02	24766897	A	G	INTERGENIC	NA	A/A	3,0	A/G	3,63	A/G	35,35	G|G	0,9	NA
Chr02	24766909	T	C	INTERGENIC	NA	T/T	3,0	T/C	3,63	T/C	35,33	C|C	0,11	NA
Chr02	24766920	T	C	INTERGENIC	NA	T/T	5,0	T/C	3,61	T/C	35,33	C|C	0,13	NA
Chr02	24766922	G	A	INTERGENIC	NA	G/G	5,0	G/A	3,61	G/A	35,33	A|A	0,13	NA
Chr02	24766949	C	A	INTERGENIC	NA	C/C	5,0	C/A	2,58	C/A	34,34	A|A	0,12	NA
Chr02	24766971	G	A	INTERGENIC	NA	G/G	4,0	G/A	2,58	G/A	38,34	A|A	0,12	NA
Chr02	24766996	A	C	INTERGENIC	NA	A/A	4,0	A/C	3,61	A/C	38,34	C|C	0,12	NA
Chr02	24767010	T	A	INTERGENIC	NA	T/T	5,0	T/A	3,61	T/A	38,34	A|A	0,10	NA
Chr02	24767030	T	C	INTERGENIC	NA	T/T	6,0	T/C	3,61	T/C	38,34	C|C	0,12	NA
Chr02	24767061	A	G	INTERGENIC	NA	A/A	3,0	A/G	2,60	A/G	37,35	G/G	0,7	NA
Chr02	24767147	A	T	INTERGENIC	NA	A/A	2,0	A/T	3,61	A/T	36,32	T|T	0,6	NA
Chr02	24767164	C	G	INTERGENIC	NA	C/C	1,0	C/G	3,61	C/G	39,31	G|G	0,7	NA
Chr02	24767191	C	G	INTERGENIC	NA	C/C	2,0	C/G	3,65	C/G	38,26	G/G	0,5	NA
Chr02	24767238	A	G	INTERGENIC	NA	A/A	4,0	A/G	4,56	A/G	37,29	G|G	0,7	NA
Chr02	24767253	G	A	INTERGENIC	NA	G/G	4,0	G/A	4,54	G/A	38,28	A|A	0,9	NA
Chr02	24767265	T	C	INTERGENIC	NA	T/T	4,0	T/C	4,54	T/C	37,25	C|C	0,9	NA
Chr02	24767312	G	C	INTERGENIC	NA	G/G	5,0	G/C	4,52	G/C	37,31	C/C	0,4	NA
Chr02	24767340	G	A	INTERGENIC	NA	G/G	4,0	G/A	6,48	G/A	40,30	A|A	0,4	NA
Chr02	24767365	G	A	INTERGENIC	NA	G/G	4,0	G/A	3,47	G/A	41,27	A|A	0,4	NA
Chr02	24767372	T	G	INTERGENIC	NA	T/T	3,0	T/G	5,47	T/G	41,27	G|G	0,3	NA
Chr02	24767455	A	T	INTERGENIC	NA	A/A	1,0	A/T	2,50	A/T	38,24	T|T	0,1	NA
Chr02	24767473	A	G	INTERGENIC	NA	A/A	1,0	A/G	1,51	A/G	39,27	G|G	0,1	NA
Chr02	24767506	G	A	INTERGENIC	NA	G/G	2,0	G/A	2,60	G/A	36,30	A/A	0,9	NA
Chr02	24767525	C	T	INTERGENIC	NA	C/C	2,0	C/T	2,56	C/T	34,32	T/T	0,9	NA
Chr02	24767546	A	G	INTERGENIC	NA	A/A	2,0	A/G	2,56	A/G	33,33	G|G	0,8	NA
Chr02	24767549	T	A	INTERGENIC	NA	T/T	2,0	T/A	2,56	T/A	33,33	A|A	0,8	NA
Chr02	24767554	A	C	INTERGENIC	NA	A/A	2,0	A/C	2,56	A/C	33,33	C|C	0,7	NA
Chr02	24767577	A	G	INTERGENIC	NA	A/A	1,0	A/G	2,60	A/G	33,31	G/G	0,8	NA
Chr02	24767610	A	T	INTERGENIC	NA	A/A	2,0	A/T	2,62	A/T	32,32	T/T	0,8	NA
Chr02	24767661	A	G	INTERGENIC	NA	A/A	2,0	A/G	2,60	A/G	30,32	G|G	0,7	NA
Chr02	24767701	A	G	INTERGENIC	NA	A/A	2,0	A/G	3,59	A/G	31,31	G|G	0,5	NA
Chr02	24767726	A	T	INTERGENIC	NA	A/A	2,0	A/T	3,55	A/T	30,30	T|T	0,6	NA
Chr02	24767745	A	G	INTERGENIC	NA	A/A	1,0	A/G	3,53	A/G	29,29	G|G	0,6	NA
Chr02	24767753	C	T	INTERGENIC	NA	C/C	1,0	C/T	3,49	C/T	28,28	T|T	0,9	NA
Chr02	24767770	T	A	INTERGENIC	NA	T/T	2,0	T/A	5,49	T/A	33,27	A|A	0,7	NA
Chr02	24767772	G	A	INTERGENIC	NA	G/G	2,0	G/A	5,51	G/A	33,27	A|A	0,7	NA
Chr02	24767803	A	T	INTERGENIC	NA	A/A	1,0	A/T	9,51	A/T	36,32	T/T	0,8	NA
Chr02	24767982	T	C	INTERGENIC	NA	T/T	2,0	T/C	1,59	T/C	36,34	C|C	0,10	NA
Chr02	24768002	G	C	INTERGENIC	NA	G/G	2,0	G/C	3,57	G/C	38,32	C|C	0,11	NA
Chr02	24768028	G	A	INTERGENIC	NA	G/G	3,0	G/A	3,59	G/A	34,36	A|A	0,14	NA
Chr02	24768049	G	A	INTERGENIC	NA	G/G	4,0	G/A	3,59	G/A	34,36	A|A	0,10	NA
Chr02	24768054	A	G	INTERGENIC	NA	A/A	4,0	A/G	3,59	A/G	34,36	G|G	0,10	NA
Chr02	24768083	G	A	INTERGENIC	NA	G/G	6,0	G/A	3,59	G/A	30,36	A|A	0,9	NA
Chr02	24768106	G	T	INTERGENIC	NA	G/G	5,0	G/T	3,55	G/T	36,32	T|T	0,10	NA
Chr02	24768120	C	T	INTERGENIC	NA	C/C	4,0	C/T	3,55	C/T	32,34	T|T	0,9	NA
Chr02	24768166	T	C	INTERGENIC	NA	T/T	7,0	C/C	0,64	T/C	35,35	C/C	0,7	NA
Chr02	24768188	A	G	INTERGENIC	NA	A/A	7,0	A/G	3,63	A/G	36,32	G/G	0,12	NA
Chr02	24768219	A	C	INTERGENIC	NA	A/A	5,0	A/C	3,63	A/C	40,32	C/C	0,14	NA
Chr02	24768227	C	G	INTERGENIC	NA	C/C	5,0	C/G	3,61	C/G	39,31	G/G	0,15	NA
Chr02	24768236	T	C	INTERGENIC	NA	T/T	5,0	T/C	3,61	T/C	41,31	C/C	0,16	NA
Chr02	24768239	T	A	INTERGENIC	NA	T/T	5,0	T/A	3,63	T/A	39,31	A/A	0,15	NA
Chr02	24768255	A	G	INTERGENIC	NA	A/A	5,0	A/G	2,60	A/G	42,30	G/G	0,13	NA
Chr02	24768267	C	T	INTERGENIC	NA	C/C	5,0	C/T	2,60	C/T	43,29	T/T	0,14	NA
Chr02	24768292	A	C	INTERGENIC	NA	A/A	5,0	A/C	2,58	A/C	42,28	C/C	0,15	NA
Chr02	24768306	A	G	INTERGENIC	NA	A/A	2,0	G/G	0,56	A/G	42,28	G/G	0,15	NA
Chr02	24768314	A	G	INTERGENIC	NA	A/A	2,0	A/G	2,54	A/G	42,28	G/G	0,16	NA
Chr02	24768329	A	G	INTERGENIC	NA	A/A	2,0	A/G	6,52	A/G	46,24	G/G	0,15	NA
Chr02	24768389	A	T	INTERGENIC	NA	A/A	2,0	T/T	0,64	A/T	41,29	T/T	0,12	NA
Chr02	24768617	A	G	INTERGENIC	NA	A/A	3,0	A/G	6,60	A/G	37,35	G/G	0,17	NA
Chr02	24768631	A	G	INTERGENIC	NA	A/A	3,0	A/G	2,62	A/G	35,35	G/G	0,15	NA
Chr02	24768657	A	G	INTERGENIC	NA	A/A	4,0	A/G	2,68	A/G	32,38	G/G	0,12	NA
Chr02	24768725	A	C	INTERGENIC	NA	A/A	5,0	A/C	2,64	A/C	34,32	C/C	0,7	NA
Chr02	24768802	A	C	INTERGENIC	NA	A/A	4,0	A/C	2,64	A/C	29,35	C|C	0,6	NA
Chr02	24768820	A	G	INTERGENIC	NA	A/A	6,0	A/G	2,60	A/G	30,34	G|G	0,7	NA
Chr02	24768860	G	A	INTERGENIC	NA	G/G	9,0	G/A	3,57	G/A	36,34	A|A	0,9	NA
Chr02	24768879	T	G	INTERGENIC	NA	T/T	7,0	T/G	1,57	T/G	39,33	G|G	0,8	NA
Chr02	24768939	A	G	INTERGENIC	NA	A/A	9,0	A/G	1,65	A/G	38,30	G|G	0,11	NA
Chr02	24768951	T	G	INTERGENIC	NA	T/T	9,0	T/G	1,65	T/G	36,32	G|G	0,12	NA
Chr02	24768961	A	G	INTERGENIC	NA	A/A	8,0	A/G	1,63	A/G	36,32	G|G	0,13	NA
Chr02	24769012	G	T	INTERGENIC	NA	G/G	7,0	G/T	2,66	G/T	35,33	T|T	0,14	NA
Chr02	24769086	G	A	INTERGENIC	NA	G/G	5,0	G/A	2,64	G/A	33,33	A/A	0,10	NA
Chr02	24769126	T	C	INTERGENIC	NA	T/T	2,0	T/C	2,62	T/C	28,34	C/C	0,5	NA
Chr02	24769163	A	T	INTERGENIC	NA	A/A	3,0	A/T	3,51	A/T	30,38	T/T	0,5	NA
Chr02	24769210	C	T	INTERGENIC	NA	C/C	3,0	C/T	2,56	C/T	30,38	T/T	0,6	NA
Chr02	24769254	G	T	INTERGENIC	NA	G/G	2,0	G/T	2,54	G/T	37,31	T/T	0,4	NA
Chr02	24769300	C	A	INTERGENIC	NA	C/C	2,0	C/A	2,54	C/A	48,24	A|A	0,7	NA
Chr02	24769306	C	G	INTERGENIC	NA	C/C	2,0	C/G	2,54	C/G	48,24	G|G	0,6	NA
Chr02	24769358	G	A	INTERGENIC	NA	G/G	4,0	G/A	2,52	G/A	44,26	A|A	0,7	NA
Chr02	24769362	A	C	INTERGENIC	NA	A/A	4,0	A/C	2,52	A/C	46,26	C|C	0,7	NA
Chr02	24769395	G	T	INTERGENIC	NA	G/G	5,0	G/T	2,56	G/T	39,25	T|T	0,8	NA
Chr02	24769401	T	C	INTERGENIC	NA	T/T	5,0	T/C	2,56	T/C	41,25	C|C	0,7	NA
Chr02	24769403	G	A	INTERGENIC	NA	G/G	5,0	G/A	2,56	G/A	41,25	A|A	0,7	NA
Chr02	24769489	G	A	INTERGENIC	NA	G/G	7,0	G/A	3,63	G/A	38,30	A/A	0,5	NA
Chr02	24769606	C	T	INTERGENIC	NA	C/C	2,0	C/T	1,67	C/T	39,31	T/T	0,9	NA
Chr02	24769617	G	A	INTERGENIC	NA	G/G	3,0	G/A	1,65	G/A	38,32	A/A	0,10	NA
Chr02	24769628	T	C	INTERGENIC	NA	T/T	3,0	T/C	1,67	T/C	39,31	C|C	0,12	NA
Chr02	24769631	C	T	INTERGENIC	NA	C/C	3,0	C/T	1,67	C/T	39,31	T|T	0,12	NA
Chr02	24769701	A	G	INTERGENIC	NA	A/A	3,0	A/G	1,67	A/G	38,32	G|G	0,20	NA
Chr02	24769709	C	A	INTERGENIC	NA	C/C	3,0	C/A	1,67	C/A	40,32	A|A	0,19	NA
Chr02	24769711	T	C	INTERGENIC	NA	T/T	3,0	T/C	1,67	T/C	38,32	C|C	0,19	NA
Chr02	24769862	C	T	INTERGENIC	NA	C/C	2,0	C/T	3,63	C/T	36,34	T|T	0,12	NA
Chr02	24769870	A	C	INTERGENIC	NA	A/A	3,0	A/C	3,63	A/C	39,33	C|C	0,13	NA
Chr02	24769902	T	C	INTERGENIC	NA	T/T	2,0	T/C	1,63	T/C	36,34	C|C	0,14	NA
Chr02	24769903	G	A	INTERGENIC	NA	G/G	2,0	G/A	1,63	G/A	36,34	A|A	0,14	NA
Chr02	24769959	T	C	INTERGENIC	NA	T/T	1,0	C/C	0,68	T/C	36,34	C|C	0,14	NA
Chr02	24769966	A	C	INTERGENIC	NA	A/A	1,0	A/C	1,67	A/C	36,34	C|C	0,14	NA
Chr02	24769978	C	T	INTERGENIC	NA	C/C	1,0	C/T	2,66	C/T	34,34	T/T	0,12	NA
Chr02	24770128	A	C	INTERGENIC	NA	A/A	2,0	A/C	2,58	A/C	28,36	C|C	0,16	NA
Chr02	24770141	C	T	INTERGENIC	NA	C/C	1,0	C/T	5,57	C/T	35,33	T|T	1,15	NA
Chr02	24770157	A	C	INTERGENIC	NA	A/A	1,0	A/C	2,58	A/C	30,36	C|C	0,17	NA
Chr02	24770162	G	T	INTERGENIC	NA	G/G	1,0	G/T	5,57	G/T	34,34	T|T	1,16	NA
Chr02	24770179	T	C	INTERGENIC	NA	T/T	1,0	T/C	2,58	T/C	33,35	C|C	0,18	NA
Chr02	24770258	T	A	INTERGENIC	NA	T/T	1,0	T/A	4,62	T/A	38,34	A|A	0,11	NA
Chr02	24770263	A	T	INTERGENIC	NA	A/A	1,0	A/T	3,63	A/T	38,34	T|T	0,11	NA
Chr02	24770304	C	A	INTERGENIC	NA	C/C	1,0	C/A	3,65	C/A	33,29	A/A	0,8	NA
Chr02	24770401	A	C	INTERGENIC	NA	A/A	4,0	A/C	2,62	A/C	36,36	C/C	0,4	NA
Chr02	24770427	C	T	INTERGENIC	NA	C/C	4,0	C/T	2,62	C/T	37,35	T/T	0,6	NA
Chr02	24770470	A	G	INTERGENIC	NA	A/A	1,0	A/G	2,56	A/G	42,30	G/G	0,7	NA
Chr02	24770531	A	T	INTERGENIC	NA	A/A	2,0	A/T	3,51	A/T	39,31	T|T	0,5	NA
Chr02	24770536	C	G	INTERGENIC	NA	C/C	2,0	C/G	3,51	C/G	39,31	G|G	0,5	NA
Chr02	24770572	A	T	INTERGENIC	NA	A/A	3,0	A/T	3,55	A/T	38,30	T|T	0,6	NA
Chr02	24770579	C	T	INTERGENIC	NA	C/C	4,0	C/T	3,55	C/T	41,29	T|T	0,6	NA
Chr02	24770588	T	C	INTERGENIC	NA	T/T	4,0	T/C	3,55	T/C	39,29	C|C	0,6	NA
Chr02	24770801	T	A	INTERGENIC	NA	T/T	1,0	T/A	3,57	T/A	39,33	A/A	0,8	NA
Chr02	24770895	T	G	INTERGENIC	NA	T/T	3,0	T/G	3,57	T/G	35,31	G|G	0,9	NA
Chr02	24770908	T	C	INTERGENIC	NA	T/T	3,0	T/C	3,53	T/C	37,31	C|C	0,7	NA
Chr02	24770928	A	G	INTERGENIC	NA	A/A	3,0	A/G	3,53	A/G	36,32	G|G	0,7	NA
Chr02	24770936	A	C	INTERGENIC	NA	A/A	3,0	A/C	3,55	A/C	36,32	C|C	0,6	NA
Chr02	24770959	C	T	INTERGENIC	NA	C/C	2,0	C/T	24,38	C/T	49,19	T|T	0,5	NA
Chr02	24770986	G	C	INTERGENIC	NA	G/G	2,0	G/C	3,57	G/C	38,30	C|C	0,4	NA
Chr02	24770994	G	T	INTERGENIC	NA	G/G	2,0	G/T	3,57	G/T	40,30	T|T	0,3	NA
Chr02	24771007	T	A	INTERGENIC	NA	T/T	1,0	T/A	2,56	T/A	39,29	A|A	0,3	NA
Chr02	24771065	C	T	INTERGENIC	NA	C/C	1,0	C/T	1,61	C/T	39,27	T/T	0,1	NA
Chr02	24771112	G	A	INTERGENIC	NA	G/G	3,0	G/A	2,54	G/A	38,26	A|A	0,1	NA
Chr02	24771113	T	G	INTERGENIC	NA	T/T	3,0	T/G	22,36	T/G	50,20	G|G	0,1	NA
Chr02	24771149	C	G	INTERGENIC	NA	C/C	5,0	C/G	4,36	C/G	45,23	G|G	0,1	NA
Chr02	24771157	A	G	INTERGENIC	NA	A/A	5,0	A/G	4,36	A/G	43,23	G|G	0,1	NA
Chr02	24771168	A	G	INTERGENIC	NA	A/A	6,0	A/G	3,35	A/G	44,22	G|G	0,1	NA
Chr02	24771197	G	A	INTERGENIC	NA	G/G	6,0	G/A	7,15	G/A	52,14	A|A	0,1	NA
Chr02	24771223	G	C	INTERGENIC	NA	G/G	7,0	G/C	9,5	G/C	52,10	C|C	0,1	NA
Chr02	24771299	G	T	INTERGENIC	NA	G/G	5,0	G/T	20,22	G/T	51,17	T|T	0,5	NA
Chr02	24771313	T	C	INTERGENIC	NA	T/T	5,0	T/C	1,39	T/C	45,23	C|C	0,5	NA
Chr02	24771328	C	T	INTERGENIC	NA	C/C	4,0	C/T	17,33	C/T	51,19	T|T	0,4	NA
Chr02	24771339	C	T	INTERGENIC	NA	C/C	5,0	C/T	2,40	C/T	47,23	T|T	0,4	NA
Chr02	24771358	T	A	INTERGENIC	NA	T/T	5,0	T/A	36,16	T/A	61,9	A|A	0,4	NA
Chr02	24771379	A	G	INTERGENIC	NA	A/A	4,0	A/G	15,35	A/G	54,16	G|G	0,2	NA
Chr02	24771398	T	C	INTERGENIC	NA	T/T	4,0	T/C	11,37	T/C	52,16	C|C	0,1	NA
Chr02	24771411	T	C	INTERGENIC	NA	T/T	4,0	T/C	35,17	T/C	56,10	C|C	0,1	NA
Chr02	24771545	A	G	INTERGENIC	NA	A/A	1,0	A/G	2,66	A/G	39,27	G/G	0,4	NA
Chr02	24771571	G	A	INTERGENIC	NA	G/G	1,0	G/A	3,65	G/A	42,28	A/A	0,5	NA
Chr02	24771703	A	G	INTERGENIC	NA	A/A	7,0	A/G	3,57	A/G	36,30	G|G	0,11	NA
Chr02	24771705	A	G	INTERGENIC	NA	A/A	7,0	A/G	3,57	A/G	36,30	G|G	0,11	NA
Chr02	24771709	G	A	INTERGENIC	NA	G/G	7,0	G/A	3,57	G/A	36,30	A|A	0,13	NA
Chr02	24771717	C	T	INTERGENIC	NA	C/C	7,0	C/T	3,55	C/T	38,30	T|T	0,12	NA
Chr02	24771718	A	G	INTERGENIC	NA	A/A	7,0	A/G	3,55	A/G	38,30	G|G	0,12	NA
Chr02	24771721	C	T	INTERGENIC	NA	C/C	7,0	C/T	3,55	C/T	37,31	T|T	0,12	NA
Chr02	24771728	A	C	INTERGENIC	NA	A/A	8,0	A/C	3,55	A/C	38,30	C|C	0,12	NA
Chr02	24771759	A	T	INTERGENIC	NA	A/A	9,0	A/T	4,58	A/T	35,33	T/T	0,13	NA
Chr02	24771801	G	A	INTERGENIC	NA	G/G	7,0	G/A	4,56	G/A	39,33	A|A	0,11	NA
Chr02	24771807	G	C	INTERGENIC	NA	G/G	7,0	G/C	3,57	G/C	36,34	C|C	0,11	NA
Chr02	24771831	A	G	INTERGENIC	NA	A/A	6,0	A/G	3,55	A/G	36,36	G|G	0,11	NA
Chr02	24771837	A	G	INTERGENIC	NA	A/A	6,0	A/G	3,55	A/G	35,35	G|G	0,10	NA
Chr02	24771843	T	C	INTERGENIC	NA	T/T	8,0	T/C	3,55	T/C	35,35	C|C	0,10	NA
Chr02	24771848	G	A	INTERGENIC	NA	G/G	9,0	G/A	3,51	G/A	33,35	A|A	0,10	NA
Chr02	24771854	A	C	INTERGENIC	NA	A/A	8,0	A/C	3,51	A/C	35,35	C|C	0,10	NA
Chr02	24771865	G	A	INTERGENIC	NA	G/G	6,0	G/A	4,50	G/A	35,37	A/A	0,12	NA
Chr02	24771919	T	C	INTERGENIC	NA	T/T	6,0	T/C	5,53	T/C	30,38	C|C	0,11	NA
Chr02	24771926	C	T	INTERGENIC	NA	C/C	5,0	C/T	5,53	C/T	29,39	T|T	0,9	NA
Chr02	24771929	A	G	INTERGENIC	NA	A/A	5,0	A/G	5,53	A/G	29,39	G|G	0,9	NA
Chr02	24771930	C	T	INTERGENIC	NA	C/C	5,0	C/T	5,53	C/T	29,39	T|T	0,9	NA
Chr02	24772022	A	T	INTERGENIC	NA	A/A	2,0	A/T	2,60	A/T	35,31	T/T	0,8	NA
Chr02	24772090	C	G	INTERGENIC	NA	C/C	2,0	C/G	2,54	C/G	39,29	G|G	0,11	NA
Chr02	24772106	G	T	INTERGENIC	NA	G/G	3,0	G/T	3,49	G/T	36,30	T|T	0,8	NA
Chr02	24772121	T	A	INTERGENIC	NA	T/T	4,0	T/A	3,49	T/A	38,30	A|A	0,7	NA
Chr02	24772146	G	A	INTERGENIC	NA	G/G	3,0	G/A	5,49	G/A	40,28	A|A	0,7	NA
Chr02	24772185	T	A	INTERGENIC	NA	T/T	2,0	T/A	16,40	T/A	43,21	A/A	0,7	NA
Chr02	24772477	A	G	INTERGENIC	NA	A/A	2,0	G/G	0,66	A/G	39,33	G/G	0,14	NA
Chr02	24772518	C	A	INTERGENIC	NA	C/C	3,0	A/A	0,60	C/A	34,34	A|A	0,13	NA
Chr02	24772521	C	T	INTERGENIC	NA	C/C	3,0	C/T	2,60	C/T	37,33	T|T	0,13	NA
Chr02	24772559	T	A	INTERGENIC	NA	T/T	3,0	T/A	2,58	T/A	34,38	A|A	0,11	NA
Chr02	24772574	G	T	INTERGENIC	NA	G/G	3,0	T/T	0,58	G/T	32,38	T|T	0,7	NA
Chr02	24772601	T	C	INTERGENIC	NA	T/T	3,0	T/C	1,59	T/C	36,34	C/C	0,10	NA
Chr02	24772641	A	C	INTERGENIC	NA	A/A	2,0	A/C	2,56	A/C	38,30	C|C	0,10	NA
Chr02	24772671	T	A	INTERGENIC	NA	T/T	3,0	T/A	2,52	T/A	40,26	A/A	0,11	NA
Chr02	24772737	C	G	INTERGENIC	NA	C/C	4,0	C/G	5,49	C/G	38,24	G|G	0,15	NA
Chr02	24772738	T	C	INTERGENIC	NA	T/T	4,0	T/C	5,49	T/C	38,24	C|C	0,15	NA
Chr02	24772769	T	C	INTERGENIC	NA	T/T	4,0	T/C	4,50	T/C	38,28	C|C	0,13	NA
Chr02	24772781	A	G	INTERGENIC	NA	A/A	4,0	A/G	4,50	A/G	37,29	G|G	0,13	NA
Chr02	24772809	A	G	INTERGENIC	NA	A/A	3,0	A/G	4,50	A/G	37,31	G/G	0,15	NA
Chr02	24772859	C	T	INTERGENIC	NA	C/C	3,0	C/T	4,50	C/T	37,33	T/T	0,15	NA
Chr02	24772901	T	C	INTERGENIC	NA	T/T	2,0	T/C	3,65	T/C	39,31	C/C	0,13	NA
Chr02	24772925	T	C	INTERGENIC	NA	T/T	2,0	T/C	3,65	T/C	35,33	C|C	0,14	NA
Chr02	24772928	C	T	INTERGENIC	NA	C/C	2,0	C/T	3,65	C/T	35,33	T|T	0,15	NA
Chr02	24772946	A	G	INTERGENIC	NA	A/A	2,0	A/G	3,65	A/G	38,32	G/G	0,15	NA
Chr02	24772970	A	G	INTERGENIC	NA	A/A	2,0	A/G	3,65	A/G	38,30	G|G	0,15	NA
Chr02	24772980	G	A	INTERGENIC	NA	G/G	1,0	G/A	3,63	G/A	38,30	A|A	0,17	NA
Chr02	24773187	A	T	INTERGENIC	NA	A/A	2,0	A/T	2,68	A/T	32,40	T/T	0,15	NA
Chr02	24773219	T	G	INTERGENIC	NA	T/T	4,0	T/G	2,68	T/G	33,39	G|G	0,11	NA
Chr02	24773224	T	C	INTERGENIC	NA	T/T	4,0	T/C	2,68	T/C	34,38	C|C	0,12	NA
Chr02	24773312	C	T	INTERGENIC	NA	C/C	2,0	C/T	10,60	C/T	42,30	T/T	0,14	NA
Chr02	24773504	G	A	INTERGENIC	NA	G/G	1,0	G/A	13,47	G/A	37,35	A/A	0,10	NA
Chr02	24773570	C	G	INTERGENIC	NA	C/C	1,0	C/G	11,47	C/G	36,36	G/G	0,7	NA
Chr02	24773596	G	A	INTERGENIC	NA	G/G	2,0	G/A	11,49	G/A	36,36	A|A	0,8	NA
Chr02	24773601	A	C	INTERGENIC	NA	A/A	2,0	A/C	7,53	A/C	35,35	C|C	0,8	NA
Chr02	24773665	A	C	INTERGENIC	NA	A/A	1,0	A/C	3,67	A/C	35,37	C/C	0,7	NA
Chr02	24773684	A	T	INTERGENIC	NA	A/A	2,0	A/T	3,67	A/T	34,38	T/T	0,8	NA
Chr02	24773709	T	C	INTERGENIC	NA	T/T	3,0	T/C	3,67	T/C	35,37	C/C	0,9	NA
Chr02	24773744	A	T	INTERGENIC	NA	A/A	2,0	A/T	3,61	A/T	35,37	T/T	0,11	NA
Chr02	24773769	A	C	INTERGENIC	NA	A/A	2,0	A/C	3,63	A/C	37,35	C/C	0,13	NA
Chr02	24773825	A	C	INTERGENIC	NA	A/A	3,0	A/C	2,62	A/C	32,36	C|C	0,12	NA
Chr02	24773827	C	A	INTERGENIC	NA	C/C	3,0	C/A	2,62	C/A	32,36	A|A	0,12	NA
Chr02	24773909	C	A	INTERGENIC	NA	C/C	5,0	C/A	3,57	C/A	35,37	A/A	0,11	NA
Chr02	24773958	A	C	INTERGENIC	NA	A/A	3,0	A/C	2,60	A/C	29,43	C|C	0,17	NA
Chr02	24773964	A	T	INTERGENIC	NA	A/A	3,0	A/T	3,59	A/T	29,43	T|T	0,16	NA
Chr02	24774078	T	A	INTERGENIC	NA	T/T	2,0	T/A	2,66	T/A	35,33	A/A	0,15	NA
Chr02	24774091	A	C	INTERGENIC	NA	A/A	2,0	A/C	2,64	A/C	36,32	C/C	0,15	NA
Chr02	24774160	G	C	INTERGENIC	NA	G/G	1,0	G/C	4,54	G/C	37,33	C/C	0,10	NA
Chr02	24774204	G	A	INTERGENIC	NA	G/G	3,0	G/A	2,56	G/A	40,30	A/A	0,7	NA
Chr02	24774232	A	G	INTERGENIC	NA	A/A	3,0	A/G	2,56	A/G	39,33	G/G	0,9	NA
Chr02	24774351	A	G	INTERGENIC	NA	A/A	6,0	A/G	2,58	A/G	32,36	G|G	0,7	NA
Chr02	24774354	A	T	INTERGENIC	NA	A/A	6,0	A/T	5,57	A/T	32,36	T|T	0,7	NA
Chr02	24774370	A	G	INTERGENIC	NA	A/A	6,0	A/G	2,58	A/G	32,36	G|G	0,7	NA
Chr02	24774385	C	G	INTERGENIC	NA	C/C	6,0	C/G	5,57	C/G	33,35	G|G	0,6	NA
Chr02	24774392	G	A	INTERGENIC	NA	G/G	6,0	G/A	2,58	G/A	33,35	A|A	0,6	NA
Chr02	24774455	T	C	INTERGENIC	NA	T/T	4,0	T/C	2,56	T/C	38,28	C|C	0,3	NA
Chr02	24774459	A	T	INTERGENIC	NA	A/A	4,0	A/T	2,56	A/T	39,27	T|T	0,3	NA
Chr02	24774499	T	C	INTERGENIC	NA	T/T	3,0	T/C	4,54	T/C	36,32	C|C	0,3	NA
Chr02	24774531	G	A	INTERGENIC	NA	G/G	5,0	G/A	2,48	G/A	34,32	A|A	0,6	NA
Chr02	24774535	T	G	INTERGENIC	NA	T/T	5,0	T/G	2,48	T/G	34,34	G|G	0,8	NA
Chr02	24774540	G	A	INTERGENIC	NA	G/G	4,0	G/A	4,50	G/A	34,34	A|A	0,8	NA
Chr02	24774553	C	T	INTERGENIC	NA	C/C	4,0	C/T	2,48	C/T	34,34	T|T	0,13	NA
Chr02	24774593	A	G	INTERGENIC	NA	A/A	4,0	A/G	2,44	A/G	32,36	G|G	0,15	NA
Chr02	24774594	T	G	INTERGENIC	NA	T/T	4,0	T/G	2,46	T/G	32,36	G|G	0,15	NA
Chr02	24774637	T	A	INTERGENIC	NA	T/T	2,0	T/A	3,45	T/A	32,34	A|A	0,22	NA
Chr02	24774642	C	T	INTERGENIC	NA	C/C	2,0	C/T	3,45	C/T	32,34	T|T	0,23	NA
Chr02	24774697	A	G	INTERGENIC	NA	A/A	1,0	A/G	3,51	A/G	31,39	G/G	0,19	NA
Chr02	24774715	A	T	INTERGENIC	NA	A/A	2,0	A/T	3,55	A/T	31,37	T/T	0,19	NA
Chr02	24774778	C	G	INTERGENIC	NA	C/C	4,0	C/G	2,60	C/G	36,34	G/G	0,18	NA
Chr02	24774815	A	G	INTERGENIC	NA	A/A	4,0	A/G	3,67	A/G	35,33	G|G	0,18	NA
Chr02	24774821	C	T	INTERGENIC	NA	C/C	4,0	C/T	5,67	C/T	37,33	T|T	0,18	NA
Chr02	24774839	C	A	INTERGENIC	NA	C/C	4,0	C/A	2,70	C/A	38,30	A|A	0,18	NA
Chr02	24774900	C	T	INTERGENIC	NA	C/C	2,0	C/T	3,65	C/T	38,32	T/T	0,20	NA
Chr02	24774922	C	T	INTERGENIC	NA	C/C	2,0	C/T	3,61	C/T	37,33	T/T	0,23	NA
Chr02	24774997	T	C	INTERGENIC	NA	T/T	2,0	T/C	3,61	T/C	38,28	C|C	0,17	NA
Chr02	24775001	A	G	INTERGENIC	NA	A/A	2,0	A/G	3,59	A/G	42,28	G|G	0,17	NA
Chr02	24775056	A	T	INTERGENIC	NA	A/A	2,0	A/T	1,57	A/T	38,32	T/T	0,14	NA
Chr02	24775067	A	G	INTERGENIC	NA	A/A	2,0	A/G	3,57	A/G	39,31	G|G	0,14	NA
Chr02	24775076	A	G	INTERGENIC	NA	A/A	2,0	A/G	1,57	A/G	40,32	G|G	0,14	NA
Chr02	24775092	C	T	INTERGENIC	NA	C/C	3,0	C/T	3,57	C/T	39,33	T/T	0,14	NA
Chr02	24775179	G	A	INTERGENIC	NA	G/G	6,0	G/A	1,65	G/A	38,32	A/A	0,9	NA
Chr02	24775194	A	T	INTERGENIC	NA	A/A	7,0	A/T	1,65	A/T	39,31	T|T	0,8	NA
Chr02	24775201	G	A	INTERGENIC	NA	G/G	7,0	G/A	1,63	G/A	39,31	A|A	0,9	NA
Chr02	24775260	A	G	INTERGENIC	NA	A/A	10,0	A/G	3,59	A/G	36,30	G/G	0,6	NA
Chr02	24775273	G	A	INTERGENIC	NA	G/G	11,0	G/A	3,61	G/A	35,31	A/A	0,6	NA
Chr02	24775291	T	A	INTERGENIC	NA	T/T	9,0	T/A	3,57	T/A	43,27	A|A	0,8	NA
Chr02	24775294	C	A	INTERGENIC	NA	C/C	9,0	C/A	3,57	C/A	43,27	A|A	0,8	NA
Chr02	24775384	A	G	INTERGENIC	NA	A/A	4,0	A/G	2,62	A/G	42,28	G/G	0,11	NA
Chr02	24775405	T	A	INTERGENIC	NA	T/T	2,0	T/A	2,58	T/A	40,28	A/A	0,11	NA
Chr02	24775443	T	C	INTERGENIC	NA	T/T	1,0	T/C	2,62	T/C	39,29	C|C	0,7	NA
Chr02	24775456	T	C	INTERGENIC	NA	T/T	1,0	T/C	2,60	T/C	38,30	C/C	0,6	NA
Chr02	24775482	G	T	INTERGENIC	NA	G/G	2,0	G/T	2,62	G/T	37,29	T|T	0,6	NA
Chr02	24775483	G	A	INTERGENIC	NA	G/G	2,0	G/A	2,62	G/A	37,29	A|A	0,6	NA
Chr02	24775487	T	C	INTERGENIC	NA	T/T	2,0	T/C	2,62	T/C	38,30	C|C	0,7	NA
Chr02	24775492	A	G	INTERGENIC	NA	A/A	2,0	A/G	2,62	A/G	38,30	G|G	0,6	NA
Chr02	24775545	G	A	INTERGENIC	NA	G/G	4,0	G/A	2,62	G/A	40,28	A/A	0,6	NA
Chr02	24775557	A	G	INTERGENIC	NA	A/A	4,0	A/G	2,64	A/G	42,28	G/G	0,5	NA
Chr02	24775575	G	A	INTERGENIC	NA	G/G	4,0	G/A	2,64	G/A	38,30	A|A	0,8	NA
Chr02	24775577	T	G	INTERGENIC	NA	T/T	4,0	T/G	2,64	T/G	37,31	G|G	0,8	NA
Chr02	24775586	T	C	INTERGENIC	NA	T/T	4,0	T/C	2,64	T/C	34,34	C|C	0,8	NA
Chr02	24775589	A	G	INTERGENIC	NA	A/A	4,0	A/G	2,64	A/G	35,33	G|G	0,8	NA
Chr02	24775640	A	G	INTERGENIC	NA	A/A	4,0	A/G	3,57	A/G	34,36	G/G	0,7	NA
Chr02	24775675	A	G	INTERGENIC	NA	A/A	3,0	A/G	2,62	A/G	35,37	G|G	0,8	NA
Chr02	24775687	C	G	INTERGENIC	NA	C/C	2,0	C/G	27,41	C/G	52,20	G|G	0,8	NA
Chr02	24775690	C	G	INTERGENIC	NA	C/C	2,0	C/G	2,66	C/G	38,34	G|G	0,8	NA
Chr02	24775700	C	T	INTERGENIC	NA	C/C	3,0	C/T	2,66	C/T	38,34	T|T	0,9	NA
Chr02	24775701	C	G	INTERGENIC	NA	C/C	3,0	C/G	2,66	C/G	38,34	G|G	0,9	NA
Chr02	24775708	T	C	INTERGENIC	NA	T/T	3,0	T/C	2,66	T/C	38,34	C|C	0,9	NA
Chr02	24776043	G	C	INTERGENIC	NA	G/G	7,0	G/C	33,35	G/C	41,29	C/C	0,7	NA
Chr02	24776088	T	C	INTERGENIC	NA	T/T	3,0	T/C	27,41	T/C	42,26	C/C	0,8	NA
Chr02	24776115	T	C	INTERGENIC	NA	T/T	3,0	T/C	3,55	T/C	39,33	C|C	0,9	NA
Chr02	24776130	G	A	INTERGENIC	NA	G/G	3,0	G/A	16,46	G/A	42,30	A|A	0,8	NA
Chr02	24776181	T	G	INTERGENIC	NA	T/T	3,0	T/G	11,39	T/G	41,25	G|G	0,7	NA
Chr02	24776183	C	T	INTERGENIC	NA	C/C	3,0	C/T	10,40	C/T	39,25	T|T	0,7	NA
Chr02	24776185	A	G	INTERGENIC	NA	A/A	3,0	A/G	3,43	A/G	35,25	G|G	0,7	NA
Chr02	24776229	A	T	INTERGENIC	NA	A/A	5,0	A/T	11,25	A/T	46,12	T|T	0,3	NA
Chr02	24776230	C	T	INTERGENIC	NA	C/C	5,0	C/T	11,25	C/T	46,12	T|T	0,3	NA
Chr02	24776381	C	T	INTERGENIC	NA	C/C	2,0	C/T	2,52	C/T	41,25	T|T	0,3	NA
Chr02	24776482	C	T	INTERGENIC	NA	C/C	2,0	C/T	2,60	C/T	42,22	T|T	0,6	NA
Chr02	24776510	T	C	INTERGENIC	NA	T/T	2,0	T/C	2,58	T/C	40,28	C|C	0,7	NA
Chr02	24776559	C	T	INTERGENIC	NA	C/C	5,0	C/T	2,58	C/T	38,28	T|T	0,6	NA
Chr02	24776562	C	T	INTERGENIC	NA	C/C	5,0	C/T	2,58	C/T	38,28	T|T	0,7	NA
Chr02	24776580	A	G	INTERGENIC	NA	A/A	6,0	A/G	2,56	A/G	38,28	G|G	0,7	NA
Chr02	24777318	C	T	INTERGENIC	NA	C/C	1,0	C/T	37,23	C/T	55,15	T/T	0,3	NA
Chr02	24777338	T	C	INTERGENIC	NA	T/T	1,0	T/C	4,54	T/C	44,28	C|C	0,3	NA
Chr02	24777341	G	A	INTERGENIC	NA	G/G	1,0	G/A	3,55	G/A	42,28	A|A	0,3	NA
Chr02	24777480	A	T	INTERGENIC	NA	A/A	1,0	A/T	1,61	A/T	27,31	T|T	0,6	NA
Chr02	24777521	G	A	INTERGENIC	NA	G/G	1,0	G/A	1,59	G/A	24,30	A|A	0,11	NA
Chr02	24777534	G	A	INTERGENIC	NA	G/G	1,0	G/A	1,59	G/A	24,28	A|A	0,12	NA
Chr02	24777543	A	G	INTERGENIC	NA	A/A	1,0	A/G	13,49	A/G	43,21	G|G	0,12	NA
Chr02	24777555	A	G	INTERGENIC	NA	A/A	3,0	A/G	1,57	A/G	25,25	G|G	0,11	NA
Chr02	24777593	A	G	INTERGENIC	NA	A/A	2,0	A/G	3,49	A/G	28,26	G|G	0,8	NA
Chr02	24777626	C	T	INTERGENIC	NA	C/C	3,0	C/T	3,39	C/T	30,22	T|T	0,7	NA
Chr02	24777654	C	A	INTERGENIC	NA	C/C	4,0	C/A	3,27	C/A	32,24	A|A	0,7	NA
Chr02	24777663	T	C	INTERGENIC	NA	T/T	4,0	T/C	4,26	T/C	30,24	C|C	0,7	NA
Chr02	24777685	T	G	INTERGENIC	NA	T/T	4,0	T/G	3,25	T/G	30,22	G|G	0,7	NA
Chr02	24777734	G	A	INTERGENIC	NA	G/G	2,0	G/A	2,30	G/A	31,23	A/A	0,11	NA
Chr02	24777750	G	C	INTERGENIC	NA	G/G	2,0	G/C	2,28	G/C	32,22	C/C	0,11	NA
Chr02	24777763	T	C	INTERGENIC	NA	T/T	1,0	T/C	2,30	T/C	32,20	C/C	0,10	NA
Chr02	24777855	G	C	INTERGENIC	NA	G/G	1,0	G/C	4,18	G/C	52,10	C|C	0,3	NA
Chr02	24777868	C	T	INTERGENIC	NA	C/C	1,0	C/T	4,14	C/T	54,6	T/T	0,1	NA
Chr02	24777880	C	A	INTERGENIC	NA	C/C	1,0	C/A	4,16	C/A	57,5	A/A	0,2	NA
Chr02	24777893	T	G	INTERGENIC	NA	T/T	2,0	T/G	4,14	T/G	57,3	G/G	0,2	NA
Chr02	24777916	C	G	INTERGENIC	NA	C/C	3,0	C/G	2,12	C/G	54,2	G|G	0,2	NA
Chr02	24777940	A	C	INTERGENIC	NA	A/A	3,0	A/C	2,16	A/C	57,1	C/C	0,2	NA
Chr02	24777963	T	G	INTERGENIC	NA	T/T	3,0	T/G	4,16	T/G	57,1	G/G	0,4	NA
Chr02	24777974	A	C	INTERGENIC	NA	A/A	3,0	A/C	3,21	A/C	50,2	C/C	0,4	NA
Chr02	24777995	T	C	INTERGENIC	NA	T/T	4,0	T/C	1,33	T/C	46,6	C/C	0,4	NA
Chr02	24778030	T	C	INTERGENIC	NA	T/T	3,0	T/C	1,51	T/C	41,27	C/C	0,6	NA
Chr02	24778049	T	A	INTERGENIC	NA	T/T	2,0	T/A	2,52	T/A	44,24	A/A	0,7	NA
Chr02	24778087	A	C	INTERGENIC	NA	A/A	4,0	A/C	2,52	A/C	37,27	C/C	0,8	NA
Chr02	24778113	C	T	INTERGENIC	NA	C/C	7,0	C/T	2,52	C/T	39,25	T|T	0,11	NA
Chr02	24778119	A	G	INTERGENIC	NA	A/A	7,0	A/G	2,52	A/G	33,25	G|G	0,11	NA
Chr02	24778120	T	C	INTERGENIC	NA	T/T	7,0	T/C	2,52	T/C	33,25	C|C	0,12	NA
Chr02	24778130	T	C	INTERGENIC	NA	T/T	5,0	T/C	4,52	T/C	35,23	C|C	0,12	NA
Chr02	24778132	G	A	INTERGENIC	NA	G/G	5,0	G/A	4,50	G/A	36,22	A|A	0,12	NA
Chr02	24778148	T	G	INTERGENIC	NA	T/T	5,0	T/G	2,50	T/G	36,22	G|G	0,12	NA
Chr02	24778193	C	T	INTERGENIC	NA	C/C	7,0	C/T	11,57	C/T	43,23	T/T	0,11	NA
Chr02	24778277	G	A	INTERGENIC	NA	G/G	4,0	G/A	17,55	G/A	39,33	A/A	0,9	NA
Chr02	24778337	A	C	INTERGENIC	NA	A/A	4,0	A/C	2,68	A/C	37,31	C/C	0,10	NA
Chr02	24778349	T	A	INTERGENIC	NA	T/T	3,0	T/A	12,62	T/A	43,29	A|A	0,11	NA
Chr02	24778359	T	C	INTERGENIC	NA	T/T	3,0	T/C	1,69	T/C	38,30	C|C	0,12	NA
Chr02	24778374	T	A	INTERGENIC	NA	T/T	3,0	T/A	11,61	T/A	43,29	A|A	0,10	NA
Chr02	24778377	G	C	INTERGENIC	NA	G/G	3,0	G/C	11,61	G/C	43,29	C|C	0,10	NA
Chr02	24778382	T	C	INTERGENIC	NA	T/T	4,0	T/C	9,61	T/C	41,29	C|C	0,8	NA
Chr02	24778385	A	C	INTERGENIC	NA	A/A	4,0	A/C	9,61	A/C	43,29	C|C	0,8	NA
Chr02	24778426	T	C	INTERGENIC	NA	T/T	3,0	T/C	6,66	T/C	39,33	C/C	0,11	NA
Chr02	24778457	G	A	INTERGENIC	NA	G/G	3,0	G/A	6,64	G/A	39,33	A/A	0,10	NA
Chr02	24778494	G	A	INTERGENIC	NA	G/G	2,0	G/A	5,61	G/A	39,33	A|A	0,8	NA
Chr02	24778498	T	G	INTERGENIC	NA	T/T	2,0	T/G	5,61	T/G	39,33	G|G	0,8	NA
Chr02	24778511	A	C	INTERGENIC	NA	A/A	2,0	A/C	5,63	A/C	39,33	C|C	0,6	NA
Chr02	24778521	G	C	INTERGENIC	NA	G/G	2,0	G/C	3,63	G/C	39,33	C|C	0,5	NA
Chr02	24778602	G	A	INTERGENIC	NA	G/G	1,0	G/A	2,64	G/A	41,29	A/A	0,4	NA
Chr02	24778622	T	A	INTERGENIC	NA	T/T	1,0	T/A	23,45	T/A	50,20	A|A	0,5	NA
Chr02	24778631	G	T	INTERGENIC	NA	G/G	1,0	G/T	2,64	G/T	39,31	T|T	0,5	NA
Chr02	24778649	G	A	INTERGENIC	NA	G/G	1,0	G/A	3,61	G/A	39,31	A/A	0,6	NA
Chr02	24778703	T	C	INTERGENIC	NA	T/T	2,0	T/C	3,63	T/C	38,34	C/C	0,10	NA
Chr02	24778752	C	T	INTERGENIC	NA	C/C	2,0	C/T	2,60	C/T	32,30	T/T	0,19	NA
Chr02	24778796	G	A	INTERGENIC	NA	G/G	3,0	G/A	3,63	G/A	35,35	A/A	0,19	NA
Chr02	24778810	T	G	INTERGENIC	NA	T/T	3,0	T/G	2,64	T/G	38,32	G/G	0,20	NA
Chr02	24778869	C	A	INTERGENIC	NA	C/C	7,0	C/A	2,70	C/A	39,33	A|A	0,10	NA
Chr02	24778877	G	A	INTERGENIC	NA	G/G	8,0	G/A	2,68	G/A	41,31	A|A	0,10	NA
Chr02	24778914	C	A	INTERGENIC	NA	C/C	9,0	C/A	2,72	C/A	41,31	A/A	0,9	NA
Chr02	24778925	A	G	INTERGENIC	NA	A/A	9,0	A/G	2,72	A/G	41,31	G/G	0,10	NA
Chr02	24778959	T	C	INTERGENIC	NA	T/T	12,0	T/C	2,66	T/C	38,34	C/C	0,7	NA
Chr02	24778995	A	G	INTERGENIC	NA	A/A	11,0	A/G	2,72	A/G	37,35	G|G	0,9	NA
Chr02	24778999	G	A	INTERGENIC	NA	G/G	11,0	G/A	2,72	G/A	37,35	A|A	0,9	NA
Chr02	24779002	G	A	INTERGENIC	NA	G/G	11,0	G/A	2,72	G/A	37,35	A|A	0,9	NA
Chr02	24779048	C	A	INTERGENIC	NA	C/C	9,0	C/A	2,68	C/A	36,36	A|A	0,10	NA
Chr02	24779053	C	T	INTERGENIC	NA	C/C	9,0	C/T	4,68	C/T	36,36	T|T	0,10	NA
Chr02	24779061	G	C	INTERGENIC	NA	G/G	9,0	G/C	2,68	G/C	34,38	C|C	0,9	NA
Chr02	24779086	T	G	INTERGENIC	NA	T/T	5,0	T/G	2,68	T/G	37,33	G/G	0,9	NA
Chr02	24779132	A	G	INTERGENIC	NA	A/A	7,0	A/G	2,70	A/G	38,34	G/G	0,10	NA
Chr02	24779166	A	G	INTERGENIC	NA	A/A	4,0	A/G	2,70	A/G	35,35	G/G	0,6	NA
Chr02	24779195	A	G	INTERGENIC	NA	A/A	3,0	A/G	3,63	A/G	37,33	G|G	0,8	NA
Chr02	24779201	C	A	INTERGENIC	NA	C/C	4,0	C/A	3,63	C/A	37,33	A|A	0,8	NA
Chr02	24779234	C	A	INTERGENIC	NA	C/C	3,0	C/A	2,62	C/A	38,32	A|A	0,11	NA
Chr02	24779241	T	C	INTERGENIC	NA	T/T	3,0	T/C	2,62	T/C	38,32	C|C	0,10	NA
Chr02	24779254	T	G	INTERGENIC	NA	T/T	3,0	T/G	2,62	T/G	37,33	G/G	0,9	NA
Chr02	24779276	C	T	INTERGENIC	NA	C/C	3,0	C/T	2,64	C/T	38,32	T/T	0,9	NA
Chr02	24779362	G	T	INTERGENIC	NA	G/G	4,0	G/T	2,68	G/T	34,38	T|T	0,14	NA
Chr02	24779372	G	A	INTERGENIC	NA	G/G	4,0	G/A	2,68	G/A	34,36	A|A	0,11	NA
Chr02	24779402	C	A	INTERGENIC	NA	C/C	4,0	C/A	2,66	C/A	35,35	A/A	0,9	NA
Chr02	24779424	A	G	INTERGENIC	NA	A/A	4,0	A/G	2,64	A/G	36,32	G|G	0,8	NA
Chr02	24779427	G	A	INTERGENIC	NA	G/G	4,0	G/A	2,64	G/A	36,32	A|A	0,9	NA
Chr02	24779571	G	C	INTERGENIC	NA	G/G	5,0	G/C	3,55	G/C	35,31	C/C	0,9	NA
Chr02	24779589	G	A	INTERGENIC	NA	G/G	6,0	G/A	3,53	G/A	34,32	A/A	0,8	NA
Chr02	24779607	G	A	INTERGENIC	NA	G/G	5,0	G/A	4,48	G/A	34,32	A|A	0,8	NA
Chr02	24779613	A	C	INTERGENIC	NA	A/A	5,0	A/C	4,48	A/C	34,32	C|C	0,8	NA
Chr02	24779643	G	T	INTERGENIC	NA	G/G	5,0	G/T	4,48	G/T	35,33	T|T	0,7	NA
Chr02	24779650	C	A	INTERGENIC	NA	C/C	2,0	C/A	4,46	C/A	35,33	A|A	0,7	NA
Chr02	24779651	T	C	INTERGENIC	NA	T/T	2,0	T/C	4,46	T/C	35,33	C|C	0,7	NA
Chr02	24779658	A	C	INTERGENIC	NA	A/A	2,0	A/C	4,44	A/C	33,33	C|C	0,8	NA
Chr02	24779661	T	C	INTERGENIC	NA	T/T	2,0	T/C	4,42	T/C	34,32	C|C	0,8	NA
Chr02	24779667	A	G	INTERGENIC	NA	A/A	2,0	A/G	4,40	A/G	38,30	G|G	0,8	NA
Chr02	24779671	A	G	INTERGENIC	NA	A/A	2,0	A/G	4,40	A/G	38,30	G|G	0,9	NA
Chr02	24779701	C	T	INTERGENIC	NA	C/C	3,0	C/T	3,37	C/T	37,27	T|T	0,10	NA
Chr02	24779713	A	G	INTERGENIC	NA	A/A	2,0	A/G	3,43	A/G	40,24	G|G	0,7	NA
Chr02	24779928	G	C	INTERGENIC	NA	G/G	6,0	G/C	3,9	G/C	42,12	C|C	0,1	NA
Chr02	24779930	A	G	INTERGENIC	NA	A/A	6,0	A/G	3,9	A/G	42,12	G|G	0,1	NA
Chr02	24779933	G	A	INTERGENIC	NA	G/G	7,0	G/A	3,9	G/A	48,10	A|A	0,1	NA
Chr02	24779936	G	A	INTERGENIC	NA	G/G	6,0	G/A	5,7	G/A	48,8	A|A	0,1	NA
Chr02	24779948	A	T	INTERGENIC	NA	A/A	6,0	A/T	4,4	A/T	44,8	T|T	0,2	NA
Chr02	24779982	G	A	INTERGENIC	NA	G/G	5,0	G/A	21,17	G/A	46,20	A|A	0,5	NA
Chr02	24779986	G	A	INTERGENIC	NA	G/G	5,0	G/A	21,17	G/A	46,20	A|A	0,5	NA
Chr02	24780006	G	T	INTERGENIC	NA	G/G	5,0	G/T	21,17	G/T	43,19	T|T	0,6	NA
Chr02	24780016	C	T	INTERGENIC	NA	C/C	5,0	C/T	4,28	C/T	38,22	T|T	0,7	NA
Chr02	24780089	A	G	INTERGENIC	NA	A/A	4,0	A/G	1,37	A/G	37,15	G/G	0,7	NA
Chr02	24780121	A	G	INTERGENIC	NA	A/A	3,0	A/G	22,10	A/G	44,6	G|G	0,5	NA
Chr02	24780179	G	A	INTERGENIC	NA	G/G	1,0	G/A	1,15	G/A	45,7	A|A	0,1	NA
Chr02	24780241	G	T	INTERGENIC	NA	T/T	0,2	G/G	34,0	G/T	59,1	G/G	3,0	NA
Chr02	24780356	A	C	INTERGENIC	NA	A/A	1,0	A/C	1,23	A/C	48,10	C|C	0,4	NA
Chr02	24780369	T	C	INTERGENIC	NA	T/T	2,0	T/C	1,27	T/C	45,11	C|C	0,4	NA
Chr02	24780383	A	T	INTERGENIC	NA	A/A	2,0	A/T	17,21	A/T	46,12	T|T	0,5	NA
Chr02	24780419	C	T	INTERGENIC	NA	C/C	4,0	C/T	16,30	C/T	45,23	T|T	0,5	NA
Chr02	24780535	T	C	INTERGENIC	NA	T/T	5,0	T/C	34,34	T/C	39,31	C|C	0,7	NA
Chr02	24780538	T	A	INTERGENIC	NA	A/A	0,4	T/A	45,27	T/T	72,0	T/T	7,0	NA
Chr02	24780558	G	A	INTERGENIC	NA	G/G	7,0	G/A	36,36	G/A	40,32	A|A	0,10	NA
Chr02	24780693	C	A	INTERGENIC	NA	C/C	12,0	C/A	22,20	C/A	50,14	A|A	0,3	NA
Chr02	24780881	C	T	INTERGENIC	NA	C/C	5,0	C/T	63,3	C/T	62,6	T|T	0,2	NA
Chr02	24780915	T	C	INTERGENIC	NA	T/T	5,0	T/C	2,62	T/C	35,33	C|C	0,6	NA
Chr02	24780939	A	G	INTERGENIC	NA	A/A	4,0	A/G	3,59	A/G	36,32	G|G	0,4	NA
Chr02	24780986	C	T	INTERGENIC	NA	C/C	4,0	C/T	29,43	C/T	39,33	T/T	0,2	NA
Chr02	24781100	G	T	INTERGENIC	NA	G/G	6,0	G/T	2,48	G/T	44,18	T|T	0,5	NA
Chr02	24781102	T	A	INTERGENIC	NA	T/T	6,0	T/A	2,48	T/A	46,18	A|A	0,5	NA
Chr02	24781125	T	C	INTERGENIC	NA	T/T	6,0	T/C	4,40	T/C	45,17	C|C	0,6	NA
Chr02	24781148	C	G	INTERGENIC	NA	C/C	9,0	C/G	7,37	C/G	49,17	G|G	0,6	NA
Chr02	24781194	A	G	INTERGENIC	NA	A/A	7,0	A/G	4,44	A/G	47,19	G/G	0,6	NA
Chr02	24781225	T	C	INTERGENIC	NA	T/T	4,0	T/C	3,53	T/C	41,25	C|C	0,9	NA
Chr02	24781235	G	A	INTERGENIC	NA	G/G	4,0	G/A	12,46	G/A	41,25	A|A	0,10	NA
Chr02	24781239	C	T	INTERGENIC	NA	C/C	4,0	C/T	15,45	C/T	41,25	T|T	0,10	NA
Chr02	24781246	C	T	INTERGENIC	NA	C/C	6,0	C/T	17,45	C/T	41,25	T|T	0,11	NA
Chr02	24781350	G	A	INTERGENIC	NA	G/G	6,0	G/A	11,61	G/A	34,36	A/A	0,7	NA
Chr02	24781387	T	A	INTERGENIC	NA	T/T	6,0	T/A	5,65	T/A	34,36	A|A	0,8	NA
Chr02	24781397	A	G	INTERGENIC	NA	A/A	6,0	A/G	4,64	A/G	34,36	G|G	0,8	NA
Chr02	24781440	T	C	INTERGENIC	NA	T/T	7,0	T/C	4,66	T/C	33,35	C/C	0,9	NA
Chr02	24781497	T	C	INTERGENIC	NA	T/T	5,0	T/C	3,67	T/C	37,33	C/C	0,16	NA
Chr02	24781518	C	T	INTERGENIC	NA	C/C	6,0	C/T	3,69	C/T	39,33	T|T	0,15	NA
Chr02	24781527	C	G	INTERGENIC	NA	C/C	5,0	C/G	3,69	C/G	39,33	G|G	0,14	NA
Chr02	24781547	C	G	INTERGENIC	NA	C/C	6,0	C/G	3,69	C/G	43,29	G/G	0,16	NA
Chr02	24781565	A	T	INTERGENIC	NA	A/A	6,0	A/T	3,69	A/T	40,30	T|T	0,14	NA
Chr02	24781574	T	G	INTERGENIC	NA	T/T	5,0	T/G	3,69	T/G	41,31	G|G	0,13	NA
Chr02	24781605	A	G	INTERGENIC	NA	A/A	5,0	A/G	4,62	A/G	39,33	G|G	0,16	NA
Chr02	24781609	A	C	INTERGENIC	NA	A/A	3,0	A/C	4,62	A/C	39,33	C|C	0,16	NA
Chr02	24781610	G	A	INTERGENIC	NA	G/G	3,0	G/A	2,62	G/A	39,33	A|A	0,16	NA
Chr02	24781681	G	A	INTERGENIC	NA	G/G	2,0	G/A	2,60	G/A	40,32	A/A	0,14	NA
Chr02	24781844	G	T	INTERGENIC	NA	G/G	5,0	G/T	2,58	G/T	38,32	T|T	0,10	NA
Chr02	24781857	A	G	INTERGENIC	NA	A/A	5,0	A/G	2,58	A/G	39,31	G|G	0,9	NA
Chr02	24781859	T	A	INTERGENIC	NA	T/T	5,0	T/A	2,58	T/A	39,31	A|A	0,9	NA
Chr02	24781871	C	T	INTERGENIC	NA	C/C	5,0	C/T	2,58	C/T	39,31	T|T	0,8	NA
Chr02	24781884	A	G	INTERGENIC	NA	A/A	6,0	A/G	2,54	A/G	39,31	G|G	0,7	NA
Chr02	24781938	T	C	INTERGENIC	NA	T/T	7,0	T/C	2,64	T/C	41,29	C|C	0,9	NA
Chr02	24781943	T	C	INTERGENIC	NA	T/T	7,0	T/C	2,64	T/C	39,29	C|C	0,9	NA
Chr02	24781974	C	A	INTERGENIC	NA	C/C	4,0	C/A	2,62	C/A	39,29	A|A	0,7	NA
Chr02	24781976	A	G	INTERGENIC	NA	A/A	4,0	A/G	2,62	A/G	39,29	G|G	0,7	NA
Chr02	24782024	G	A	INTERGENIC	NA	G/G	5,0	G/A	3,63	G/A	37,33	A|A	0,8	NA
Chr02	24782025	C	T	INTERGENIC	NA	C/C	5,0	C/T	3,63	C/T	37,33	T|T	0,8	NA
Chr02	24782073	G	A	INTERGENIC	NA	G/G	4,0	G/A	5,53	G/A	35,35	A/A	0,9	NA
Chr02	24782093	T	C	INTERGENIC	NA	T/T	5,0	T/C	3,59	T/C	35,33	C|C	0,7	NA
Chr02	24782101	A	G	INTERGENIC	NA	A/A	5,0	A/G	3,59	A/G	35,33	G|G	0,7	NA
Chr02	24782133	C	T	INTERGENIC	NA	C/C	4,0	C/T	2,62	C/T	35,37	T/T	0,8	NA
Chr02	24782150	A	C	INTERGENIC	NA	A/A	4,0	A/C	2,60	A/C	34,38	C/C	0,6	NA
Chr02	24782268	T	C	INTERGENIC	NA	T/T	1,0	T/C	2,62	T/C	30,40	C/C	0,4	NA
Chr02	24782362	T	G	INTERGENIC	NA	T/T	3,0	T/G	2,62	T/G	36,34	G/G	0,4	NA
Chr02	24782382	T	C	INTERGENIC	NA	T/T	2,0	T/C	3,59	T/C	40,32	C|C	0,4	NA
Chr02	24782390	C	T	INTERGENIC	NA	C/C	2,0	C/T	3,59	C/T	41,31	T|T	0,4	NA
Chr02	24782436	C	T	INTERGENIC	NA	C/C	3,0	C/T	3,55	C/T	45,25	T|T	0,3	NA
Chr02	24782438	G	C	INTERGENIC	NA	G/G	3,0	G/C	3,55	G/C	43,25	C|C	0,3	NA
Chr02	24782442	C	T	INTERGENIC	NA	C/C	3,0	C/T	3,53	C/T	42,26	T|T	0,3	NA
Chr02	24782465	T	C	INTERGENIC	NA	T/T	2,0	T/C	3,43	T/C	40,28	C|C	0,1	NA
Chr02	24782466	T	C	INTERGENIC	NA	T/T	2,0	T/C	21,31	T/C	44,24	C|C	0,1	NA
Chr02	24782533	A	C	INTERGENIC	NA	A/A	1,0	A/C	3,51	A/C	35,31	C/C	0,2	NA
Chr02	24782561	A	G	INTERGENIC	NA	A/A	3,0	A/G	3,49	A/G	41,31	G/G	0,4	NA
Chr02	24782599	A	G	INTERGENIC	NA	A/A	3,0	A/G	3,57	A/G	40,32	G/G	0,6	NA
Chr02	24782613	G	T	INTERGENIC	NA	G/G	3,0	G/T	2,58	G/T	40,32	T/T	0,6	NA
Chr02	24782631	A	G	INTERGENIC	NA	A/A	3,0	A/G	1,57	A/G	39,31	G|G	0,7	NA
Chr02	24782636	T	C	INTERGENIC	NA	T/T	3,0	T/C	1,55	T/C	39,31	C|C	0,6	NA
Chr02	24782644	G	T	INTERGENIC	NA	G/G	5,0	G/T	21,37	G/T	53,19	T|T	0,6	NA
Chr02	24782649	A	G	INTERGENIC	NA	A/A	5,0	A/G	2,54	A/G	36,32	G|G	0,7	NA
Chr02	24782661	G	A	INTERGENIC	NA	G/G	5,0	G/A	2,60	G/A	38,32	A|A	0,10	NA
Chr02	24782667	C	G	INTERGENIC	NA	C/C	6,0	C/G	2,60	C/G	37,31	G|G	0,10	NA
Chr02	24782691	C	A	INTERGENIC	NA	C/C	5,0	C/A	3,59	C/A	38,32	A|A	0,10	NA
Chr02	24782693	A	G	INTERGENIC	NA	A/A	5,0	A/G	3,59	A/G	38,32	G|G	0,10	NA
Chr02	24782700	C	T	INTERGENIC	NA	C/C	5,0	C/T	23,41	C/T	51,19	T|T	0,9	NA
Chr02	24782716	A	T	INTERGENIC	NA	A/A	5,0	A/T	23,39	A/T	48,20	T/T	0,8	NA
Chr02	24782728	C	T	INTERGENIC	NA	C/C	5,0	C/T	23,41	C/T	48,20	T/T	0,8	NA
Chr02	24782750	A	C	INTERGENIC	NA	A/A	5,0	A/C	2,56	A/C	34,34	C/C	0,10	NA
Chr02	24782763	G	A	INTERGENIC	NA	G/G	7,0	G/A	2,58	G/A	38,32	A/A	0,10	NA
Chr02	24782828	G	A	INTERGENIC	NA	G/G	8,0	G/A	2,60	G/A	31,35	A|A	0,13	NA
Chr02	24782837	T	C	INTERGENIC	NA	T/T	9,0	T/C	2,60	T/C	35,35	C|C	0,13	NA
Chr02	24782846	C	T	INTERGENIC	NA	C/C	8,0	C/T	2,60	C/T	36,34	T|T	0,13	NA
Chr02	24782850	C	T	INTERGENIC	NA	C/C	8,0	C/T	2,60	C/T	34,34	T|T	0,13	NA
Chr02	24782901	G	A	INTERGENIC	NA	G/G	8,0	G/A	2,62	G/A	35,37	A|A	0,17	NA
Chr02	24782907	A	G	INTERGENIC	NA	A/A	8,0	A/G	2,60	A/G	33,35	G|G	0,16	NA
Chr02	24782910	C	T	INTERGENIC	NA	C/C	8,0	C/T	2,60	C/T	34,34	T|T	0,15	NA
Chr02	24782961	T	C	INTERGENIC	NA	T/T	6,0	T/C	3,67	T/C	37,33	C/C	0,13	NA
Chr02	24783054	G	A	INTERGENIC	NA	G/G	4,0	G/A	2,66	G/A	37,33	A/A	0,16	NA
Chr02	24783074	T	C	INTERGENIC	NA	T/T	7,0	T/C	2,66	T/C	37,33	C|C	0,16	NA
Chr02	24783080	C	T	INTERGENIC	NA	C/C	8,0	C/T	2,66	C/T	41,31	T|T	0,16	NA
Chr02	24783102	C	T	INTERGENIC	NA	C/C	6,0	C/T	2,64	C/T	43,29	T/T	0,15	NA
Chr02	24783119	A	G	INTERGENIC	NA	A/A	6,0	A/G	3,61	A/G	45,27	G/G	0,17	NA
Chr02	24783142	A	G	INTERGENIC	NA	A/A	6,0	A/G	2,62	A/G	41,29	G/G	0,17	NA
Chr02	24783158	C	T	INTERGENIC	NA	C/C	6,0	C/T	2,64	C/T	41,29	T/T	0,16	NA
Chr02	24783199	C	T	INTERGENIC	NA	C/C	6,0	C/T	2,62	C/T	42,30	T|T	0,14	NA
Chr02	24783201	A	G	INTERGENIC	NA	A/A	6,0	A/G	2,62	A/G	42,30	G|G	0,14	NA
Chr02	24783230	A	C	INTERGENIC	NA	A/A	4,0	A/C	2,62	A/C	39,33	C/C	0,12	NA
Chr02	24783242	T	C	INTERGENIC	NA	T/T	3,0	T/C	2,62	T/C	41,31	C|C	0,13	NA
Chr02	24783247	G	T	INTERGENIC	NA	G/G	3,0	G/T	2,62	G/T	41,31	T|T	0,13	NA
Chr02	24783256	T	C	INTERGENIC	NA	T/T	3,0	T/C	2,62	T/C	41,31	C|C	0,13	NA
Chr02	24783261	C	G	INTERGENIC	NA	C/C	3,0	C/G	2,62	C/G	41,31	G|G	0,11	NA
Chr02	24783270	T	C	INTERGENIC	NA	T/T	3,0	T/C	2,62	T/C	42,30	C|C	0,12	NA
Chr02	24783277	G	C	INTERGENIC	NA	G/G	3,0	G/C	2,62	G/C	42,30	C|C	0,12	NA
Chr02	24783307	T	C	INTERGENIC	NA	T/T	3,0	T/C	2,60	T/C	41,29	C|C	0,10	NA
Chr02	24783312	A	T	INTERGENIC	NA	A/A	2,0	A/T	2,60	A/T	39,31	T|T	0,10	NA
Chr02	24783333	C	T	INTERGENIC	NA	C/C	3,0	C/T	2,60	C/T	35,35	T/T	0,9	NA
Chr02	24783362	G	T	INTERGENIC	NA	G/G	1,0	G/T	2,60	G/T	36,34	T|T	0,9	NA
Chr02	24783363	T	G	INTERGENIC	NA	T/T	1,0	T/G	2,60	T/G	36,34	G|G	0,9	NA
Chr02	24783381	T	C	INTERGENIC	NA	T/T	2,0	T/C	2,56	T/C	36,36	C/C	0,10	NA
Chr02	24783423	T	C	INTERGENIC	NA	T/T	3,0	T/C	2,60	T/C	36,32	C/C	0,9	NA
Chr02	24783440	T	G	INTERGENIC	NA	T/T	3,0	T/G	3,61	T/G	34,32	G/G	0,9	NA
Chr02	24783465	T	G	INTERGENIC	NA	T/T	2,0	T/G	3,63	T/G	36,32	G|G	0,9	NA
Chr02	24783468	A	G	INTERGENIC	NA	A/A	2,0	A/G	3,63	A/G	37,31	G|G	0,8	NA
Chr02	24783492	C	T	INTERGENIC	NA	C/C	2,0	C/T	3,61	C/T	39,29	T/T	0,7	NA
Chr02	24783665	T	G	INTERGENIC	NA	T/T	1,0	T/G	3,63	T/G	32,34	G|G	0,6	NA
Chr02	24783675	G	A	INTERGENIC	NA	G/G	1,0	G/A	4,62	G/A	37,35	A|A	0,7	NA
Chr02	24783698	A	G	INTERGENIC	NA	A/A	1,0	A/G	3,63	A/G	39,33	G/G	0,6	NA
Chr02	24783739	C	T	INTERGENIC	NA	C/C	2,0	C/T	4,60	C/T	35,31	T/T	0,6	NA
Chr02	24783792	T	C	INTERGENIC	NA	T/T	2,0	T/C	4,62	T/C	40,30	C|C	0,14	NA
Chr02	24783794	A	G	INTERGENIC	NA	A/A	2,0	A/G	4,62	A/G	40,30	G|G	0,14	NA
Chr02	24783841	G	A	INTERGENIC	NA	G/G	5,0	G/A	3,65	G/A	40,32	A/A	0,13	NA
Chr02	24783874	A	C	INTERGENIC	NA	A/A	4,0	A/C	3,63	A/C	38,32	C/C	0,14	NA
Chr02	24783926	A	G	INTERGENIC	NA	A/A	4,0	A/G	3,61	A/G	40,32	G|G	0,6	NA
Chr02	24784147	T	C	INTERGENIC	NA	T/T	3,0	T/C	2,56	T/C	30,42	C/C	1,15	NA
Chr02	24784212	G	C	INTERGENIC	NA	G/G	3,0	G/C	2,62	G/C	33,39	C|C	0,12	NA
Chr02	24784215	G	A	INTERGENIC	NA	G/G	3,0	G/A	2,62	G/A	33,39	A|A	0,12	NA
Chr02	24784226	C	A	INTERGENIC	NA	C/C	3,0	C/A	2,60	C/A	35,37	A/A	0,11	NA
Chr02	24784254	C	T	INTERGENIC	NA	C/C	3,0	C/T	3,61	C/T	34,34	T/T	0,12	NA
Chr02	24784301	C	T	INTERGENIC	NA	C/C	1,0	C/T	3,59	C/T	34,32	T|T	0,11	NA
Chr02	24784304	C	T	INTERGENIC	NA	C/C	1,0	C/T	3,59	C/T	34,32	T|T	0,11	NA
Chr02	24784306	C	T	INTERGENIC	NA	C/C	1,0	C/T	3,59	C/T	34,32	T|T	0,11	NA
Chr02	24784308	A	G	INTERGENIC	NA	A/A	1,0	A/G	3,59	A/G	34,32	G|G	0,12	NA
Chr02	24784314	A	G	INTERGENIC	NA	A/A	1,0	A/G	3,59	A/G	36,32	G|G	0,12	NA
Chr02	24784342	A	G	INTERGENIC	NA	A/A	1,0	A/G	5,57	A/G	38,32	G/G	0,13	NA
Chr02	24784390	A	G	INTERGENIC	NA	A/A	3,0	A/G	2,62	A/G	37,31	G|G	0,11	NA
Chr02	24784406	C	T	INTERGENIC	NA	C/C	3,0	C/T	1,59	C/T	36,32	T|T	0,9	NA
Chr02	24784426	C	T	INTERGENIC	NA	C/C	3,0	C/T	1,53	C/T	39,31	T|T	0,8	NA
Chr02	24784437	C	T	INTERGENIC	NA	C/C	3,0	C/T	1,51	C/T	42,28	T|T	0,9	NA
Chr02	24784461	A	T	INTERGENIC	NA	A/A	2,0	A/T	2,46	A/T	43,23	T|T	0,6	NA
Chr02	24784480	T	C	INTERGENIC	NA	T/T	2,0	T/C	2,42	T/C	45,23	C|C	0,5	NA
Chr02	24784572	T	C	INTERGENIC	NA	T/T	1,0	T/C	6,54	T/C	39,33	C|C	0,6	NA
Chr02	24784585	A	G	INTERGENIC	NA	A/A	1,0	A/G	6,54	A/G	37,33	G|G	0,8	NA
Chr02	24784629	C	T	INTERGENIC	NA	C/C	5,0	C/T	27,39	C/T	53,19	T/T	0,6	NA
Chr02	24784642	T	A	INTERGENIC	NA	T/T	7,0	T/A	5,57	T/A	37,33	A/A	0,7	NA
Chr02	24784658	T	C	INTERGENIC	NA	T/T	7,0	T/C	3,61	T/C	39,33	C/C	0,7	NA
Chr02	24784693	T	C	INTERGENIC	NA	T/T	8,0	T/C	3,67	T/C	39,33	C|C	0,8	NA
Chr02	24784698	C	G	INTERGENIC	NA	C/C	6,0	C/G	4,66	C/G	40,32	G|G	0,8	NA
Chr02	24784704	A	C	INTERGENIC	NA	A/A	8,0	A/C	3,67	A/C	39,33	C|C	0,8	NA
Chr02	24784725	A	C	INTERGENIC	NA	A/A	9,0	A/C	3,67	A/C	37,31	C/C	0,7	NA
Chr02	24784758	C	T	INTERGENIC	NA	C/C	6,0	C/T	5,65	C/T	42,30	T/T	0,6	NA
Chr02	24784841	T	G	INTERGENIC	NA	T/T	6,0	T/G	1,67	T/G	38,34	G/G	0,6	NA
Chr02	24784991	C	A	INTERGENIC	NA	C/C	4,0	C/A	2,62	C/A	41,31	A|A	0,20	NA
Chr02	24784999	A	C	INTERGENIC	NA	A/A	4,0	A/C	2,62	A/C	39,31	C|C	0,21	NA
Chr02	24785004	G	T	INTERGENIC	NA	G/G	4,0	G/T	2,62	G/T	40,30	T|T	0,19	NA
Chr02	24785041	A	G	INTERGENIC	NA	A/A	4,0	A/G	4,64	A/G	41,31	G|G	0,21	NA
Chr02	24785052	A	G	INTERGENIC	NA	A/A	3,0	A/G	4,64	A/G	38,32	G|G	0,21	NA
Chr02	24785077	G	A	INTERGENIC	NA	G/G	3,0	G/A	2,66	G/A	37,35	A|A	0,21	NA
Chr02	24785083	A	G	INTERGENIC	NA	A/A	2,0	A/G	2,66	A/G	36,36	G|G	0,22	NA
Chr02	24785109	C	T	INTERGENIC	NA	C/C	2,0	C/T	2,68	C/T	34,36	T/T	0,20	NA
Chr02	24785201	G	A	INTERGENIC	NA	G/G	1,0	G/A	1,65	G/A	42,30	A|A	0,16	NA
Chr02	24785207	T	C	INTERGENIC	NA	T/T	1,0	T/C	1,65	T/C	42,30	C|C	0,17	NA
Chr02	24785217	C	T	INTERGENIC	NA	C/C	1,0	C/T	1,65	C/T	42,30	T|T	0,16	NA
Chr02	24785247	G	A	INTERGENIC	NA	G/G	1,0	G/A	1,67	G/A	37,33	A/A	0,17	NA
Chr02	24785277	T	C	INTERGENIC	NA	T/T	1,0	C/C	0,60	T/C	36,32	C|C	0,14	NA
Chr02	24785279	G	A	INTERGENIC	NA	G/G	1,0	A/A	0,60	G/A	36,32	A|A	0,14	NA
Chr02	24785292	G	A	INTERGENIC	NA	G/G	1,0	A/A	0,60	G/A	36,28	A/A	0,15	NA
Chr02	24785316	A	G	INTERGENIC	NA	A/A	1,0	A/G	1,59	A/G	38,30	G/G	0,15	NA
Chr02	24785393	A	C	INTERGENIC	NA	A/A	4,0	A/C	2,54	A/C	34,32	C/C	0,13	NA
Chr02	24785432	G	T	INTERGENIC	NA	G/G	3,0	G/T	3,63	G/T	36,34	T|T	0,16	NA
Chr02	24785435	A	C	INTERGENIC	NA	A/A	3,0	A/C	3,63	A/C	38,34	C|C	0,17	NA
Chr02	24785438	T	G	INTERGENIC	NA	T/T	3,0	T/G	3,63	T/G	37,33	G|G	0,17	NA
Chr02	24785459	C	T	INTERGENIC	NA	C/C	4,0	C/T	3,61	C/T	41,27	T|T	0,19	NA
Chr02	24785484	T	G	INTERGENIC	NA	T/T	3,0	T/G	3,61	T/G	39,29	G|G	0,16	NA
Chr02	24785506	A	T	INTERGENIC	NA	A/A	2,0	A/T	2,66	A/T	35,33	T/T	0,14	NA
Chr02	24785525	A	G	INTERGENIC	NA	A/A	2,0	A/G	1,69	A/G	34,34	G/G	0,17	NA
Chr02	24785566	G	A	INTERGENIC	NA	G/G	3,0	G/A	2,68	G/A	38,32	A|A	0,16	NA
Chr02	24785570	C	T	INTERGENIC	NA	C/C	4,0	C/T	2,68	C/T	38,32	T|T	0,16	NA
Chr02	24785584	A	G	INTERGENIC	NA	A/A	5,0	A/G	2,68	A/G	37,33	G/G	0,14	NA
Chr02	24785636	T	C	INTERGENIC	NA	T/T	6,0	T/C	2,66	T/C	37,33	C/C	0,13	NA
Chr02	24785703	G	T	INTERGENIC	NA	G/G	6,0	G/T	3,65	G/T	39,33	T|T	0,13	NA
Chr02	24785708	A	C	INTERGENIC	NA	A/A	7,0	A/C	3,65	A/C	39,33	C|C	0,12	NA
Chr02	24785768	A	C	INTERGENIC	NA	A/A	6,0	A/C	3,63	A/C	42,30	C|C	0,15	NA
Chr02	24785774	A	G	INTERGENIC	NA	A/A	7,0	A/G	3,63	A/G	42,30	G|G	0,16	NA
Chr02	24785822	T	G	INTERGENIC	NA	T/T	7,0	T/G	4,60	T/G	38,34	G/G	0,11	NA
Chr02	24785839	A	G	INTERGENIC	NA	A/A	6,0	A/G	3,61	A/G	39,33	G|G	0,10	NA
Chr02	24785847	G	C	INTERGENIC	NA	G/G	6,0	G/C	3,61	G/C	39,33	C|C	0,10	NA
Chr02	24785872	T	G	INTERGENIC	NA	T/T	4,0	T/G	3,61	T/G	36,34	G|G	0,11	NA
Chr02	24785879	A	G	INTERGENIC	NA	A/A	4,0	A/G	3,61	A/G	38,34	G|G	0,8	NA
Chr02	24785917	C	T	INTERGENIC	NA	C/C	3,0	C/T	3,61	C/T	37,31	T|T	0,4	NA
Chr02	24785925	C	T	INTERGENIC	NA	C/C	1,0	C/T	3,59	C/T	37,31	T|T	0,3	NA
Chr02	24785934	C	T	INTERGENIC	NA	C/C	1,0	C/T	2,58	C/T	35,31	T|T	0,3	NA
Chr02	24785935	G	A	INTERGENIC	NA	G/G	1,0	G/A	2,58	G/A	35,31	A|A	0,3	NA
Chr02	24785962	T	G	INTERGENIC	NA	T/T	2,0	T/G	2,46	T/G	37,25	G|G	0,2	NA
Chr02	24785963	G	A	INTERGENIC	NA	G/G	2,0	G/A	2,46	G/A	37,25	A|A	0,2	NA
Chr02	24785977	C	A	INTERGENIC	NA	C/C	2,0	C/A	23,29	C/A	55,15	A/A	0,2	NA
Chr02	24786288	A	G	INTERGENIC	NA	A/A	3,0	A/G	3,49	A/G	45,23	G|G	0,3	NA
Chr02	24786304	A	G	INTERGENIC	NA	A/A	3,0	A/G	3,51	A/G	46,24	G|G	0,3	NA
Chr02	24786333	A	G	INTERGENIC	NA	A/A	5,0	A/G	3,55	A/G	39,27	G|G	0,4	NA
Chr02	24786335	C	A	INTERGENIC	NA	C/C	5,0	C/A	3,55	C/A	35,27	A|A	0,4	NA
Chr02	24786382	A	G	INTERGENIC	NA	A/A	4,0	A/G	4,64	A/G	38,28	G|G	0,8	NA
Chr02	24786410	A	G	INTERGENIC	NA	A/A	4,0	A/G	3,63	A/G	37,29	G|G	0,9	NA
Chr02	24786418	T	A	INTERGENIC	NA	T/T	5,0	T/A	3,65	T/A	37,31	A|A	0,9	NA
Chr02	24786461	G	C	INTERGENIC	NA	G/G	6,0	G/C	11,57	G/C	38,30	C/C	0,14	NA
Chr02	24786529	A	T	INTERGENIC	NA	A/A	5,0	A/T	14,54	A/T	39,31	T/T	0,17	NA
Chr02	24786607	A	C	INTERGENIC	NA	A/A	3,0	A/C	5,61	A/C	35,37	C/C	0,10	NA
Chr02	24786650	G	T	INTERGENIC	NA	G/G	2,0	G/T	4,64	G/T	36,36	T|T	0,10	NA
Chr02	24786670	G	A	INTERGENIC	NA	G/G	3,0	G/A	1,67	G/A	34,38	A|A	0,6	NA
Chr02	24786711	A	C	INTERGENIC	NA	A/A	5,0	C/C	0,60	A/C	33,39	C/C	0,8	NA
Chr02	24786763	A	G	INTERGENIC	NA	A/A	5,0	A/G	4,46	A/G	30,40	G|G	0,11	NA
Chr02	24786770	A	G	INTERGENIC	NA	A/A	4,0	G/G	0,44	A/G	32,38	G|G	0,10	NA
Chr02	24786789	G	C	INTERGENIC	NA	G/G	4,0	G/C	8,38	G/C	35,29	C|C	0,10	NA
Chr02	24786832	A	C	INTERGENIC	NA	A/A	4,0	A/C	2,48	A/C	33,27	C/C	0,11	NA
Chr02	24786848	T	C	INTERGENIC	NA	T/T	3,0	C/C	0,50	T/C	33,25	C|C	0,11	NA
Chr02	24786849	T	C	INTERGENIC	NA	T/T	3,0	C/C	0,50	T/C	33,25	C|C	0,11	NA
Chr02	24786865	T	C	INTERGENIC	NA	T/T	2,0	T/C	3,39	T/C	36,26	C|C	0,8	NA
Chr02	24786870	T	C	INTERGENIC	NA	T/T	2,0	T/C	3,39	T/C	35,25	C|C	0,8	NA
Chr02	24787027	T	G	INTERGENIC	NA	T/T	2,0	T/G	6,60	T/G	24,44	G/G	0,20	NA
Chr02	24787061	G	A	INTERGENIC	NA	G/G	3,0	G/A	3,65	G/A	32,40	A/A	0,21	NA
Chr02	24787101	T	C	INTERGENIC	NA	T/T	3,0	T/C	3,65	T/C	33,39	C|C	0,21	NA
Chr02	24787126	G	A	INTERGENIC	NA	G/G	3,0	G/A	2,66	G/A	32,38	A|A	0,17	NA
Chr02	24787154	A	T	INTERGENIC	NA	A/A	3,0	A/T	3,63	A/T	34,38	T/T	0,17	NA
Chr02	24787181	A	C	INTERGENIC	NA	A/A	3,0	A/C	3,59	A/C	33,37	C|C	0,14	NA
Chr02	24787190	G	A	INTERGENIC	NA	G/G	3,0	G/A	3,59	G/A	32,34	A|A	0,12	NA
Chr02	24787198	A	G	INTERGENIC	NA	A/A	2,0	A/G	3,59	A/G	35,33	G|G	0,12	NA
Chr02	24787208	A	C	INTERGENIC	NA	A/A	2,0	A/C	3,61	A/C	37,33	C|C	0,11	NA
Chr02	24787251	T	G	INTERGENIC	NA	T/T	2,0	T/G	5,51	T/G	46,26	G/G	0,10	NA
Chr02	24787284	C	A	INTERGENIC	NA	C/C	4,0	C/A	2,60	C/A	47,23	A/A	0,13	NA
Chr02	24787310	T	A	INTERGENIC	NA	T/T	3,0	T/A	2,54	T/A	51,19	A/A	0,9	NA
Chr02	24787369	C	T	INTERGENIC	NA	C/C	4,0	C/T	1,47	C/T	49,19	T/T	0,11	NA
Chr02	24787415	C	T	INTERGENIC	NA	C/C	3,0	C/T	5,15	C/T	43,13	T/T	0,4	NA
Chr02	24787663	T	G	INTERGENIC	NA	T/T	2,0	T/G	3,23	T/G	55,9	G/G	0,5	NA
Chr02	24787694	T	G	INTERGENIC	NA	T/T	2,0	T/G	3,29	T/G	45,13	G/G	0,5	NA
Chr02	24787718	G	A	INTERGENIC	NA	G/G	2,0	G/A	2,46	G/A	40,18	A/A	0,6	NA
Chr02	24787734	T	C	INTERGENIC	NA	T/T	2,0	T/C	1,53	T/C	39,21	C/C	0,6	NA
Chr02	24787751	T	G	INTERGENIC	NA	T/T	2,0	T/G	1,55	T/G	38,22	G/G	0,8	NA
Chr02	24787801	T	G	INTERGENIC	NA	T/T	2,0	T/G	1,69	T/G	34,34	G|G	0,6	NA
Chr02	24787815	A	C	INTERGENIC	NA	A/A	2,0	A/C	1,69	A/C	35,35	C|C	0,7	NA
Chr02	24787821	A	T	INTERGENIC	NA	A/A	2,0	A/T	1,69	A/T	34,34	T|T	0,7	NA
Chr02	24787825	A	T	INTERGENIC	NA	A/A	2,0	A/T	1,69	A/T	36,34	T|T	0,7	NA
Chr02	24787852	C	T	INTERGENIC	NA	C/C	2,0	C/T	1,65	C/T	33,35	T|T	0,8	NA
Chr02	24787861	T	A	INTERGENIC	NA	T/T	2,0	T/A	1,67	T/A	34,34	A|A	0,6	NA
Chr02	24787864	C	A	INTERGENIC	NA	C/C	2,0	C/A	1,67	C/A	35,33	A|A	0,6	NA
Chr02	24788253	A	G	INTERGENIC	NA	A/A	1,0	A/G	1,69	A/G	38,34	G|G	0,9	NA
Chr02	24788264	G	T	INTERGENIC	NA	G/G	1,0	T/T	0,70	G/T	39,33	T|T	0,9	NA
Chr02	24788267	G	T	INTERGENIC	NA	G/G	1,0	T/T	0,70	G/T	39,33	T|T	0,9	NA
Chr02	24788289	T	C	INTERGENIC	NA	T/T	1,0	T/C	2,66	T/C	42,30	C|C	0,11	NA
Chr02	24788291	G	A	INTERGENIC	NA	G/G	1,0	G/A	2,66	G/A	42,30	A|A	0,11	NA
Chr02	24788337	G	A	INTERGENIC	NA	G/G	3,0	G/A	2,64	G/A	41,29	A/A	0,13	NA
Chr02	24788382	C	T	INTERGENIC	NA	C/C	3,0	C/T	4,60	C/T	41,29	T/T	0,7	NA
Chr02	24788437	C	A	INTERGENIC	NA	C/C	2,0	C/A	4,62	C/A	40,30	A|A	0,12	NA
Chr02	24788504	C	T	INTERGENIC	NA	C/C	3,0	C/T	3,65	C/T	44,28	T/T	0,9	NA
Chr02	24788558	T	C	INTERGENIC	NA	T/T	3,0	T/C	2,70	T/C	36,32	C/C	0,10	NA
Chr02	24788947	C	A	INTERGENIC	NA	C/C	2,0	C/A	4,56	C/A	29,35	A/A	0,7	NA
Chr02	24789022	A	T	INTERGENIC	NA	A/A	4,0	A/T	4,48	A/T	37,27	T|T	0,6	NA
Chr02	24789086	C	A	INTERGENIC	NA	C/C	8,0	C/A	2,62	C/A	31,29	A|A	0,6	NA
Chr02	24789092	C	A	INTERGENIC	NA	C/C	8,0	C/A	2,62	C/A	31,29	A|A	0,6	NA
Chr02	24789100	C	T	INTERGENIC	NA	C/C	8,0	C/T	2,62	C/T	32,30	T|T	0,6	NA
Chr02	24789123	T	C	INTERGENIC	NA	T/T	8,0	T/C	3,59	T/C	33,27	C|C	0,4	NA
Chr02	24789140	G	A	INTERGENIC	NA	G/G	6,0	G/A	3,59	G/A	34,30	A|A	0,4	NA
Chr02	24789186	C	T	INTERGENIC	NA	C/C	6,0	C/T	3,51	C/T	29,33	T/T	0,11	NA
Chr02	24789245	T	C	INTERGENIC	NA	T/T	6,0	T/C	1,55	T/C	32,38	C|C	0,12	NA
Chr02	24789254	T	G	INTERGENIC	NA	T/T	6,0	T/G	1,57	T/G	33,37	G|G	0,12	NA
Chr02	24789269	A	G	INTERGENIC	NA	A/A	6,0	A/G	1,57	A/G	27,41	G/G	0,13	NA
Chr02	24789295	C	T	INTERGENIC	NA	C/C	6,0	C/T	1,61	C/T	32,38	T/T	0,14	NA
Chr02	24789328	C	A	INTERGENIC	NA	C/C	4,0	C/A	2,64	C/A	33,35	A/A	0,14	NA
Chr02	24789389	C	T	INTERGENIC	NA	C/C	1,0	C/T	4,64	C/T	29,35	T/T	0,14	NA
Chr02	24789580	T	C	INTERGENIC	NA	T/T	1,0	T/C	3,61	T/C	35,29	C/C	0,4	NA
Chr02	24789623	A	C	INTERGENIC	NA	A/A	1,0	A/C	3,49	A/C	33,27	C|C	0,6	NA
Chr02	24789666	G	A	INTERGENIC	NA	G/G	1,0	G/A	3,37	G/A	40,26	A|A	0,3	NA
Chr02	24789754	A	C	INTERGENIC	NA	A/A	1,0	A/C	5,31	A/C	40,20	C|C	0,2	NA
Chr02	24789780	A	G	INTERGENIC	NA	A/A	1,0	A/G	5,27	A/G	40,18	G|G	0,2	NA
Chr02	24789799	T	G	INTERGENIC	NA	T/T	2,0	T/G	3,27	T/G	37,19	G|G	0,3	NA
Chr02	24789805	A	G	INTERGENIC	NA	A/A	2,0	A/G	3,27	A/G	37,19	G|G	0,3	NA
Chr02	24789812	C	T	INTERGENIC	NA	C/C	2,0	C/T	3,27	C/T	31,19	T|T	0,4	NA
Chr02	24789828	G	A	INTERGENIC	NA	G/G	2,0	G/A	1,29	G/A	34,18	A|A	0,4	NA
Chr02	24789861	T	C	INTERGENIC	NA	T/T	3,0	T/C	3,47	T/C	36,20	C/C	0,5	NA
Chr02	24789913	T	C	INTERGENIC	NA	T/T	2,0	T/C	3,39	T/C	38,16	C|C	0,5	NA
Chr02	24789915	G	A	INTERGENIC	NA	G/G	2,0	G/A	26,22	G/A	51,7	A|A	0,5	NA
Chr02	24789928	A	C	INTERGENIC	NA	A/A	2,0	A/C	3,37	A/C	43,15	C|C	0,5	NA
Chr02	24790368	G	T	INTERGENIC	NA	G/G	3,0	T/T	0,26	G/T	34,16	T|T	0,2	NA
Chr02	24790385	A	G	INTERGENIC	NA	A/A	2,0	G/G	0,28	A/G	32,16	G|G	0,2	NA
Chr02	24790415	G	T	INTERGENIC	NA	G/G	2,0	G/T	4,26	G/T	24,14	T|T	0,2	NA
Chr02	24790432	A	T	INTERGENIC	NA	A/A	2,0	A/T	4,22	A/T	27,15	T|T	0,2	NA
Chr02	24790454	C	T	INTERGENIC	NA	C/C	2,0	C/T	2,22	C/T	26,14	T|T	0,3	NA
Chr02	24790455	A	G	INTERGENIC	NA	A/A	2,0	A/G	2,22	A/G	26,14	G|G	0,3	NA
Chr02	24790526	A	T	INTERGENIC	NA	A/A	1,0	A/T	3,43	A/T	28,24	T/T	0,4	NA
Chr02	24790627	A	T	INTERGENIC	NA	A/A	6,0	A/T	3,59	A/T	28,30	T|T	0,9	NA
Chr02	24790635	A	C	INTERGENIC	NA	A/A	6,0	A/C	3,59	A/C	30,28	C|C	0,10	NA
Chr02	24790711	C	T	INTERGENIC	NA	C/C	5,0	C/T	2,62	C/T	39,27	T|T	0,9	NA
Chr02	24790714	T	C	INTERGENIC	NA	T/T	5,0	T/C	2,62	T/C	39,27	C|C	0,9	NA
Chr02	24790721	G	A	INTERGENIC	NA	G/G	5,0	G/A	2,62	G/A	39,27	A|A	0,9	NA
Chr02	24790751	T	C	INTERGENIC	NA	T/T	5,0	T/C	3,63	T/C	38,26	C/C	0,9	NA
Chr02	24790783	T	C	INTERGENIC	NA	T/T	6,0	T/C	2,62	T/C	39,27	C/C	0,7	NA
Chr02	24790827	A	G	INTERGENIC	NA	A/A	8,0	A/G	2,64	A/G	35,31	G|G	0,6	NA
Chr02	24790834	T	G	INTERGENIC	NA	T/T	8,0	T/G	2,64	T/G	37,31	G|G	0,6	NA
Chr02	24790862	G	C	INTERGENIC	NA	G/G	8,0	G/C	2,60	G/C	37,33	C/C	0,9	NA
Chr02	24790889	A	G	INTERGENIC	NA	A/A	7,0	A/G	1,61	A/G	36,34	G|G	0,8	NA
Chr02	24790892	G	C	INTERGENIC	NA	G/G	7,0	G/C	1,61	G/C	36,34	C|C	0,8	NA
Chr02	24790914	C	A	INTERGENIC	NA	C/C	6,0	C/A	1,59	C/A	35,35	A|A	0,8	NA
Chr02	24790919	A	C	INTERGENIC	NA	A/A	5,0	A/C	1,59	A/C	35,35	C|C	0,9	NA
Chr02	24790994	G	A	INTERGENIC	NA	G/G	3,0	G/A	1,49	G/A	27,29	A|A	0,5	NA
Chr02	24790998	C	A	INTERGENIC	NA	C/C	2,0	C/A	1,49	C/A	29,29	A|A	0,5	NA
Chr02	24791001	G	A	INTERGENIC	NA	G/G	2,0	G/A	42,12	G/A	43,13	A|A	0,4	NA
Chr02	24791012	C	G	INTERGENIC	NA	C/C	2,0	C/G	1,45	C/G	26,26	G|G	0,2	NA
Chr02	24791026	A	C	INTERGENIC	NA	A/A	2,0	A/C	1,45	A/C	31,25	C|C	0,2	NA
Chr02	24791051	A	G	INTERGENIC	NA	A/A	2,0	A/G	1,37	A/G	24,24	G|G	0,2	NA
Chr02	24791167	T	G	INTERGENIC	NA	T/T	1,0	T/G	2,40	T/G	29,23	G/G	0,2	NA
Chr02	24791214	A	T	INTERGENIC	NA	A/A	1,0	A/T	3,45	A/T	36,22	T|T	0,5	NA
Chr02	24791277	A	G	INTERGENIC	NA	A/A	3,0	A/G	1,55	A/G	38,28	G|G	0,3	NA
Chr02	24791278	C	T	INTERGENIC	NA	C/C	3,0	C/T	24,40	C/T	50,16	T|T	0,3	NA
Chr02	24791319	T	C	INTERGENIC	NA	T/T	2,0	T/C	2,54	T/C	35,27	C|C	0,7	NA
Chr02	24791327	T	G	INTERGENIC	NA	T/T	2,0	T/G	2,56	T/G	36,28	G|G	0,7	NA
Chr02	24791358	A	G	INTERGENIC	NA	A/A	2,0	A/G	2,56	A/G	38,26	G/G	0,6	NA
Chr02	24791384	A	G	INTERGENIC	NA	A/A	2,0	A/G	2,60	A/G	37,33	G|G	0,8	NA
Chr02	24791426	A	C	INTERGENIC	NA	A/A	3,0	A/C	3,65	A/C	40,30	C|C	0,10	NA
Chr02	24791427	G	A	INTERGENIC	NA	G/G	3,0	G/A	3,65	G/A	40,30	A|A	0,10	NA
Chr02	24791444	T	C	INTERGENIC	NA	T/T	3,0	T/C	4,66	T/C	36,32	C/C	0,12	NA
Chr02	24791480	G	A	INTERGENIC	NA	G/G	4,0	G/A	4,60	G/A	35,35	A/A	0,8	NA
Chr02	24791553	G	C	INTERGENIC	NA	G/G	3,0	G/C	3,61	G/C	34,32	C|C	0,6	NA
Chr02	24791562	C	T	INTERGENIC	NA	C/C	4,0	C/T	3,59	C/T	35,31	T|T	0,5	NA
Chr02	24791606	C	T	INTERGENIC	NA	C/C	5,0	C/T	3,49	C/T	31,31	T|T	0,3	NA
Chr02	24791613	G	A	INTERGENIC	NA	G/G	4,0	G/A	22,34	G/A	44,20	A|A	0,3	NA
Chr02	24791616	A	G	INTERGENIC	NA	A/A	4,0	A/G	3,49	A/G	27,31	G|G	0,3	NA
Chr02	24791624	A	G	INTERGENIC	NA	A/A	4,0	A/G	3,47	A/G	30,34	G|G	0,3	NA
Chr02	24791645	G	C	INTERGENIC	NA	G/G	4,0	G/C	3,45	G/C	31,31	C|C	0,4	NA
Chr02	24791675	G	T	INTERGENIC	NA	G/G	4,0	G/T	3,61	G/T	35,29	T|T	0,6	NA
Chr02	24791678	G	T	INTERGENIC	NA	G/G	4,0	G/T	3,61	G/T	34,28	T|T	0,6	NA
Chr02	24791701	A	G	INTERGENIC	NA	A/A	2,0	A/G	3,59	A/G	36,26	G|G	0,9	NA
Chr02	24791705	T	C	INTERGENIC	NA	T/T	2,0	T/C	3,61	T/C	38,26	C|C	0,9	NA
Chr02	24791729	G	A	INTERGENIC	NA	G/G	2,0	G/A	3,67	G/A	35,31	A|A	0,8	NA
Chr02	24791833	C	T	INTERGENIC	NA	C/C	1,0	C/T	3,65	C/T	37,33	T/T	0,13	NA
Chr02	24791845	T	C	INTERGENIC	NA	T/T	2,0	T/C	3,67	T/C	40,30	C|C	0,11	NA
Chr02	24791852	G	A	INTERGENIC	NA	G/G	2,0	G/A	3,65	G/A	39,29	A|A	0,11	NA
Chr02	24791861	A	G	INTERGENIC	NA	A/A	2,0	A/G	3,63	A/G	41,29	G|G	0,10	NA
Chr02	24791872	C	A	INTERGENIC	NA	C/C	2,0	C/A	3,67	C/A	40,30	A/A	0,10	NA
Chr02	24791890	G	A	INTERGENIC	NA	G/G	3,0	G/A	3,65	G/A	41,29	A/A	0,9	NA
Chr02	24791903	T	C	INTERGENIC	NA	T/T	3,0	T/C	3,63	T/C	39,29	C/C	0,9	NA
Chr02	24791946	G	A	INTERGENIC	NA	G/G	1,0	G/A	3,69	G/A	37,31	A/A	0,14	NA
Chr02	24791977	A	G	INTERGENIC	NA	A/A	2,0	A/G	4,68	A/G	36,32	G/G	0,11	NA
Chr02	24792017	A	G	INTERGENIC	NA	A/A	3,0	A/G	3,69	A/G	42,30	G/G	0,13	NA
Chr02	24792112	G	A	INTERGENIC	NA	G/G	3,0	G/A	4,60	G/A	39,31	A/A	0,6	NA
Chr02	24792124	T	G	INTERGENIC	NA	T/T	4,0	T/G	4,60	T/G	38,30	G/G	0,8	NA
Chr02	24792174	G	A	INTERGENIC	NA	G/G	7,0	G/A	3,61	G/A	36,32	A/A	0,9	NA
Chr02	24792232	T	C	INTERGENIC	NA	T/T	8,0	T/C	3,65	T/C	39,33	C/C	0,9	NA
Chr02	24792247	C	T	INTERGENIC	NA	C/C	8,0	C/T	2,68	C/T	37,33	T/T	0,9	NA
Chr02	24792299	G	T	INTERGENIC	NA	G/G	7,0	G/T	3,65	G/T	36,32	T/T	0,12	NA
Chr02	24792320	A	G	INTERGENIC	NA	A/A	7,0	A/G	3,57	A/G	36,34	G|G	0,12	NA
Chr02	24792322	T	C	INTERGENIC	NA	T/T	7,0	T/C	3,57	T/C	39,33	C|C	0,12	NA
Chr02	24792330	C	A	INTERGENIC	NA	C/C	7,0	C/A	3,57	C/A	37,33	A|A	0,12	NA
Chr02	24792337	T	C	INTERGENIC	NA	T/T	7,0	T/C	3,61	T/C	34,34	C|C	0,12	NA
Chr02	24792399	G	C	INTERGENIC	NA	G/G	6,0	G/C	2,60	G/C	35,37	C|C	0,11	NA
Chr02	24792403	G	A	INTERGENIC	NA	G/G	6,0	G/A	2,60	G/A	36,36	A|A	0,11	NA
Chr02	24792528	A	G	INTERGENIC	NA	A/A	5,0	A/G	3,61	A/G	35,29	G/G	0,5	NA
Chr02	24792575	G	C	INTERGENIC	NA	G/G	5,0	G/C	3,67	G/C	40,30	C|C	0,6	NA
Chr02	24792581	C	A	INTERGENIC	NA	C/C	5,0	C/A	3,67	C/A	38,30	A|A	0,6	NA
Chr02	24792591	G	A	INTERGENIC	NA	G/G	5,0	G/A	3,65	G/A	38,30	A|A	0,5	NA
Chr02	24792610	A	G	INTERGENIC	NA	A/A	1,0	A/G	3,67	A/G	35,33	G|G	0,4	NA
Chr02	24792611	C	A	INTERGENIC	NA	C/C	1,0	C/A	3,67	C/A	35,33	A|A	0,4	NA
Chr02	24792640	C	G	INTERGENIC	NA	C/C	1,0	C/G	4,64	C/G	40,30	G|G	0,7	NA
Chr02	24792649	A	C	INTERGENIC	NA	A/A	1,0	A/C	4,64	A/C	40,30	C|C	0,6	NA
Chr02	24792652	C	T	INTERGENIC	NA	C/C	1,0	C/T	4,64	C/T	38,30	T|T	0,6	NA
Chr02	24792825	T	C	INTERGENIC	NA	T/T	1,0	T/C	2,64	T/C	39,33	C|C	0,7	NA
Chr02	24792827	T	C	INTERGENIC	NA	T/T	1,0	T/C	2,64	T/C	40,32	C|C	0,7	NA
Chr02	24792848	C	A	INTERGENIC	NA	C/C	1,0	C/A	3,59	C/A	39,31	A|A	0,6	NA
Chr02	24792849	A	T	INTERGENIC	NA	A/A	1,0	A/T	3,59	A/T	39,31	T|T	0,6	NA
Chr02	24792862	G	A	INTERGENIC	NA	G/G	1,0	G/A	3,59	G/A	35,31	A/A	0,5	NA
Chr02	24792881	C	T	INTERGENIC	NA	C/C	1,0	C/T	3,61	C/T	34,32	T/T	0,5	NA
Chr02	24792919	T	C	INTERGENIC	NA	T/T	2,0	T/C	3,61	T/C	36,34	C|C	0,7	NA
Chr02	24792924	T	C	INTERGENIC	NA	T/T	2,0	T/C	3,61	T/C	34,34	C|C	0,7	NA
Chr02	24792955	A	G	INTERGENIC	NA	A/A	2,0	A/G	3,61	A/G	36,34	G|G	0,8	NA
Chr02	24792965	G	C	INTERGENIC	NA	G/G	2,0	G/C	3,63	G/C	34,32	C|C	0,10	NA
Chr02	24792982	T	C	INTERGENIC	NA	T/T	2,0	T/C	3,65	T/C	34,30	C|C	0,9	NA
Chr02	24792984	G	A	INTERGENIC	NA	G/G	2,0	G/A	3,65	G/A	34,30	A|A	0,9	NA
Chr02	24793067	A	G	INTERGENIC	NA	A/A	1,0	A/G	3,61	A/G	37,29	G|G	0,10	NA
Chr02	24793071	T	C	INTERGENIC	NA	T/T	2,0	T/C	3,59	T/C	38,28	C|C	0,10	NA
Chr02	24793078	T	C	INTERGENIC	NA	T/T	2,0	T/C	3,59	T/C	38,28	C|C	0,10	NA
Chr02	24793084	A	C	INTERGENIC	NA	A/A	2,0	A/C	3,59	A/C	38,28	C|C	0,8	NA
Chr02	24793099	T	C	INTERGENIC	NA	T/T	2,0	T/C	3,57	T/C	38,26	C/C	0,9	NA
Chr02	24793113	A	C	INTERGENIC	NA	A/A	1,0	A/C	2,60	A/C	39,27	C/C	1,8	NA
Chr02	24793127	A	C	INTERGENIC	NA	A/A	1,0	A/C	2,60	A/C	42,28	C/C	0,8	NA
Chr02	24793145	C	T	INTERGENIC	NA	C/C	1,0	C/T	2,62	C/T	37,27	T|T	0,9	NA
Chr02	24793154	T	G	INTERGENIC	NA	T/T	1,0	T/G	2,62	T/G	41,27	G|G	0,8	NA
Chr02	24793317	T	C	INTERGENIC	NA	T/T	1,0	T/C	5,59	T/C	38,32	C|C	0,5	NA
Chr02	24793326	A	G	INTERGENIC	NA	A/A	1,0	A/G	5,57	A/G	38,32	G|G	0,5	NA
Chr02	24793360	G	C	INTERGENIC	NA	G/G	1,0	G/C	3,55	G/C	39,33	C/C	0,5	NA
Chr02	24793419	C	T	INTERGENIC	NA	C/C	2,0	C/T	2,64	C/T	37,35	T/T	0,7	NA
Chr02	24793443	C	G	INTERGENIC	NA	C/C	2,0	C/G	2,66	C/G	36,34	G/G	0,8	NA
Chr02	24793454	G	A	INTERGENIC	NA	G/G	2,0	G/A	1,67	G/A	38,32	A/A	0,9	NA
Chr02	24793470	A	G	INTERGENIC	NA	A/A	1,0	A/G	4,68	A/G	38,32	G/G	0,8	NA
Chr02	24793509	C	A	INTERGENIC	NA	C/C	1,0	C/A	3,67	C/A	40,30	A/A	0,8	NA
Chr02	24793724	T	C	INTERGENIC	NA	T/T	1,0	T/C	3,69	T/C	39,33	C/C	0,14	NA
Chr02	24793780	A	G	INTERGENIC	NA	A/A	3,0	A/G	4,62	A/G	40,32	G|G	0,15	NA
Chr02	24793784	C	A	INTERGENIC	NA	C/C	3,0	C/A	4,62	C/A	41,31	A|A	0,15	NA
Chr02	24793800	G	C	INTERGENIC	NA	G/G	3,0	G/C	3,63	G/C	40,32	C/C	0,15	NA
Chr02	24793815	C	T	INTERGENIC	NA	C/C	5,0	C/T	3,63	C/T	38,34	T/T	0,14	NA
Chr02	24793829	C	T	INTERGENIC	NA	C/C	5,0	C/T	3,63	C/T	38,34	T/T	0,10	NA
Chr02	24793948	A	G	INTERGENIC	NA	A/A	1,0	A/G	3,65	A/G	44,22	G/G	0,14	NA
Chr02	24793991	C	T	INTERGENIC	NA	C/C	1,0	C/T	2,50	C/T	36,20	T/T	0,14	NA
Chr02	24794470	C	T	INTERGENIC	NA	C/C	3,0	C/T	3,35	C/T	33,23	T|T	0,3	NA
Chr02	24794477	T	C	INTERGENIC	NA	T/T	3,0	T/C	3,35	T/C	33,23	C|C	0,3	NA
Chr02	24794517	T	A	INTERGENIC	NA	T/T	4,0	T/A	20,36	T/A	45,17	A/A	0,4	NA
Chr02	24794602	C	A	INTERGENIC	NA	C/C	4,0	C/A	2,64	C/A	34,34	A/A	0,5	NA
Chr02	24794640	G	T	INTERGENIC	NA	G/G	4,0	G/T	2,66	G/T	40,32	T/T	0,4	NA
Chr02	24794653	A	G	INTERGENIC	NA	A/A	3,0	A/G	2,66	A/G	41,31	G|G	0,6	NA
Chr02	24794662	C	G	INTERGENIC	NA	C/C	4,0	C/G	2,66	C/G	43,29	G|G	0,6	NA
Chr02	24794689	C	T	INTERGENIC	NA	C/C	3,0	C/T	2,64	C/T	37,31	T/T	0,6	NA
Chr02	24794708	A	G	INTERGENIC	NA	A/A	3,0	A/G	2,66	A/G	37,31	G/G	0,7	NA
Chr02	24794726	G	A	INTERGENIC	NA	G/G	3,0	G/A	2,66	G/A	38,32	A|A	0,7	NA
Chr02	24794735	G	A	INTERGENIC	NA	G/G	2,0	G/A	2,66	G/A	37,33	A|A	0,8	NA
Chr02	24794760	G	A	INTERGENIC	NA	G/G	2,0	G/A	2,66	G/A	37,33	A|A	0,7	NA
Chr02	24794770	C	A	INTERGENIC	NA	C/C	2,0	C/A	2,66	C/A	39,31	A|A	0,8	NA
Chr02	24794778	G	A	INTERGENIC	NA	G/G	3,0	G/A	2,64	G/A	39,31	A|A	0,9	NA
Chr02	24794783	A	G	INTERGENIC	NA	A/A	3,0	A/G	2,64	A/G	40,30	G|G	0,9	NA
Chr02	24794793	T	A	INTERGENIC	NA	T/T	3,0	T/A	2,64	T/A	40,30	A|A	0,9	NA
Chr02	24794814	T	C	INTERGENIC	NA	T/T	1,0	T/C	2,66	T/C	37,33	C/C	0,10	NA
Chr02	24794849	A	G	INTERGENIC	NA	A/A	1,0	A/G	4,56	A/G	35,33	G/G	0,10	NA
Chr02	24794882	G	C	INTERGENIC	NA	G/G	1,0	G/C	5,49	G/C	36,34	C/C	0,8	NA
Chr02	24795012	A	G	INTERGENIC	NA	A/A	1,0	A/G	3,47	A/G	33,35	G|G	0,5	NA
Chr02	24795019	A	G	INTERGENIC	NA	A/A	2,0	A/G	3,47	A/G	29,35	G|G	0,7	NA
Chr02	24795025	C	T	INTERGENIC	NA	C/C	2,0	C/T	3,47	C/T	29,35	T|T	0,6	NA
Chr02	24795026	T	C	INTERGENIC	NA	T/T	2,0	T/C	3,47	T/C	29,35	C|C	0,6	NA
Chr02	24795094	G	A	INTERGENIC	NA	G/G	2,0	G/A	2,52	G/A	32,38	A|A	0,7	NA
Chr02	24795099	G	A	INTERGENIC	NA	G/G	3,0	G/A	2,52	G/A	34,38	A|A	0,7	NA
Chr02	24795102	C	T	INTERGENIC	NA	C/C	3,0	C/T	2,52	C/T	34,38	T|T	0,7	NA
Chr02	24795146	T	C	INTERGENIC	NA	T/T	5,0	T/C	2,64	T/C	36,34	C/C	0,8	NA
Chr02	24795162	C	T	INTERGENIC	NA	C/C	4,0	C/T	2,66	C/T	35,35	T|T	0,12	NA
Chr02	24795171	C	T	INTERGENIC	NA	C/C	4,0	C/T	2,66	C/T	35,35	T|T	0,10	NA
Chr02	24795189	A	G	INTERGENIC	NA	A/A	3,0	A/G	2,68	A/G	38,34	G/G	0,11	NA
Chr02	24795209	C	A	INTERGENIC	NA	C/C	4,0	C/A	2,68	C/A	40,32	A|A	0,12	NA
Chr02	24795213	G	A	INTERGENIC	NA	G/G	5,0	G/A	2,68	G/A	41,31	A|A	0,12	NA
Chr02	24795254	C	G	INTERGENIC	NA	C/C	7,0	C/G	2,64	C/G	37,35	G/G	0,12	NA
Chr02	24795321	A	G	INTERGENIC	NA	A/A	10,0	A/G	3,63	A/G	36,34	G/G	0,10	NA
Chr02	24795335	G	A	INTERGENIC	NA	G/G	10,0	G/A	3,61	G/A	38,34	A/A	0,9	NA
Chr02	24795354	C	T	INTERGENIC	NA	C/C	9,0	C/T	3,61	C/T	37,35	T|T	0,11	NA
Chr02	24795355	A	G	INTERGENIC	NA	A/A	9,0	A/G	3,61	A/G	37,35	G|G	0,11	NA
Chr02	24795395	G	A	INTERGENIC	NA	G/G	7,0	G/A	3,61	G/A	39,33	A/A	0,8	NA
Chr02	24795418	G	A	INTERGENIC	NA	G/G	7,0	G/A	29,43	G/A	51,21	A|A	0,6	NA
Chr02	24795423	T	C	INTERGENIC	NA	T/T	7,0	T/C	3,59	T/C	40,32	C|C	0,6	NA
Chr02	24795450	C	T	INTERGENIC	NA	C/C	3,0	C/T	2,60	C/T	42,30	T/T	0,7	NA
Chr02	24795470	C	T	INTERGENIC	NA	C/C	2,0	C/T	26,44	C/T	51,21	T|T	0,8	NA
Chr02	24795471	G	A	INTERGENIC	NA	G/G	2,0	G/A	2,60	G/A	40,32	A|A	0,8	NA
Chr02	24795498	T	C	INTERGENIC	NA	T/T	1,0	T/C	4,60	T/C	39,33	C|C	0,7	NA
Chr02	24795500	G	A	INTERGENIC	NA	G/G	1,0	G/A	3,61	G/A	39,33	A|A	0,7	NA
Chr02	24795635	A	T	INTERGENIC	NA	A/A	1,0	A/T	5,53	A/T	31,37	T/T	0,10	NA
Chr02	24795648	G	A	INTERGENIC	NA	G/G	1,0	G/A	5,53	G/A	33,37	A/A	0,9	NA
Chr02	24795696	G	T	INTERGENIC	NA	G/G	3,0	G/T	5,61	G/T	38,34	T|T	0,7	NA
Chr02	24795699	T	G	INTERGENIC	NA	T/T	3,0	T/G	5,61	T/G	38,34	G|G	0,7	NA
Chr02	24795712	T	A	INTERGENIC	NA	T/T	3,0	T/A	5,63	T/A	36,34	A/A	0,7	NA
Chr02	24795756	G	T	INTERGENIC	NA	G/G	2,0	G/T	4,62	G/T	35,37	T|T	0,9	NA
Chr02	24795761	T	C	INTERGENIC	NA	T/T	2,0	T/C	4,62	T/C	36,36	C|C	0,9	NA
Chr02	24795798	A	G	INTERGENIC	NA	A/A	2,0	A/G	3,61	A/G	39,31	G/G	0,6	NA
Chr02	24795891	A	G	INTERGENIC	NA	A/A	1,0	A/G	2,50	A/G	30,30	G/G	0,10	NA
Chr02	24795955	A	T	INTERGENIC	NA	A/A	2,0	A/T	1,49	A/T	31,27	T/T	0,9	NA
Chr02	24795984	G	A	INTERGENIC	NA	G/G	2,0	G/A	1,45	G/A	30,26	A|A	0,9	NA
Chr02	24795997	T	A	INTERGENIC	NA	T/T	2,0	T/A	1,43	T/A	35,21	A|A	0,9	NA
Chr02	24795998	C	T	INTERGENIC	NA	C/C	2,0	C/T	1,43	C/T	35,21	T|T	0,9	NA
Chr02	24796015	A	C	INTERGENIC	NA	A/A	4,0	A/C	1,41	A/C	33,19	C|C	0,9	NA
Chr02	24796099	C	T	INTERGENIC	NA	C/C	3,0	C/T	3,43	C/T	26,28	T/T	0,10	NA
Chr02	24796148	A	T	INTERGENIC	NA	A/A	3,0	A/T	3,55	A/T	29,33	T/T	0,13	NA
Chr02	24796174	T	C	INTERGENIC	NA	T/T	2,0	T/C	3,59	T/C	34,30	C|C	0,15	NA
Chr02	24796176	A	G	INTERGENIC	NA	A/A	2,0	A/G	3,59	A/G	35,29	G|G	0,15	NA
Chr02	24796180	A	G	INTERGENIC	NA	A/A	2,0	A/G	3,59	A/G	36,30	G|G	0,17	NA
Chr02	24796190	C	T	INTERGENIC	NA	C/C	2,0	C/T	3,59	C/T	36,28	T|T	0,18	NA
Chr02	24796206	G	A	INTERGENIC	NA	G/G	2,0	G/A	3,57	G/A	30,28	A|A	0,18	NA
Chr02	24796216	A	G	INTERGENIC	NA	A/A	2,0	A/G	3,57	A/G	31,29	G|G	0,18	NA
Chr02	24796251	T	C	INTERGENIC	NA	T/T	6,0	T/C	3,57	T/C	31,37	C|C	0,15	NA
Chr02	24796254	C	T	INTERGENIC	NA	C/C	6,0	C/T	3,57	C/T	31,37	T|T	0,16	NA
Chr02	24796260	C	A	INTERGENIC	NA	C/C	6,0	C/A	3,57	C/A	32,38	A|A	0,14	NA
Chr02	24796303	A	G	INTERGENIC	NA	A/A	5,0	A/G	2,60	A/G	37,33	G/G	0,17	NA
Chr02	24796337	T	A	INTERGENIC	NA	T/T	6,0	T/A	2,64	T/A	34,36	A|A	0,19	NA
Chr02	24796346	T	G	INTERGENIC	NA	T/T	6,0	T/G	2,64	T/G	34,36	G|G	0,20	NA
Chr02	24796351	T	C	INTERGENIC	NA	T/T	6,0	T/C	2,64	T/C	34,36	C|C	0,19	NA
Chr02	24796360	A	C	INTERGENIC	NA	A/A	4,0	A/C	2,64	A/C	34,36	C|C	0,19	NA
Chr02	24796373	C	T	INTERGENIC	NA	C/C	5,0	C/T	2,62	C/T	36,34	T|T	0,20	NA
Chr02	24796380	A	T	INTERGENIC	NA	A/A	5,0	A/T	2,62	A/T	35,35	T|T	0,20	NA
Chr02	24796385	A	G	INTERGENIC	NA	A/A	4,0	A/G	2,60	A/G	36,34	G|G	0,20	NA
Chr02	24796405	C	T	INTERGENIC	NA	C/C	4,0	C/T	2,60	C/T	37,33	T|T	0,21	NA
Chr02	24796418	T	C	INTERGENIC	NA	T/T	5,0	T/C	2,60	T/C	38,32	C|C	0,20	NA
Chr02	24796500	G	A	INTERGENIC	NA	G/G	5,0	G/A	3,53	G/A	37,29	A|A	0,13	NA
Chr02	24796523	T	G	INTERGENIC	NA	T/T	5,0	T/G	3,51	T/G	34,30	G|G	0,14	NA
Chr02	24796528	C	A	INTERGENIC	NA	C/C	5,0	C/A	3,51	C/A	33,31	A|A	0,14	NA
Chr02	24796539	A	G	INTERGENIC	NA	A/A	6,0	A/G	5,51	A/G	35,29	G|G	0,15	NA
Chr02	24796543	T	A	INTERGENIC	NA	T/T	7,0	T/A	3,51	T/A	35,29	A|A	0,14	NA
Chr02	24796549	G	A	INTERGENIC	NA	G/G	7,0	G/A	3,51	G/A	34,30	A|A	0,14	NA
Chr02	24796571	A	C	INTERGENIC	NA	A/A	6,0	A/C	3,51	A/C	33,27	C|C	0,14	NA
Chr02	24796587	T	A	INTERGENIC	NA	T/T	5,0	T/A	4,52	T/A	32,26	A|A	0,15	NA
Chr02	24796596	C	T	INTERGENIC	NA	C/C	5,0	C/T	4,56	C/T	32,26	T|T	0,12	NA
Chr02	24796640	G	A	INTERGENIC	NA	G/G	7,0	G/A	3,61	G/A	37,31	A/A	0,12	NA
Chr02	24796667	A	G	INTERGENIC	NA	A/A	5,0	A/G	2,58	A/G	37,31	G|G	0,9	NA
Chr02	24796669	T	C	INTERGENIC	NA	T/T	5,0	T/C	2,58	T/C	37,31	C|C	0,9	NA
Chr02	24796686	T	C	INTERGENIC	NA	T/T	3,0	T/C	2,56	T/C	38,30	C|C	0,13	NA
Chr02	24796687	G	A	INTERGENIC	NA	G/G	3,0	G/A	2,56	G/A	38,30	A|A	0,13	NA
Chr02	24796694	C	T	INTERGENIC	NA	C/C	3,0	C/T	2,56	C/T	38,30	T|T	0,13	NA
Chr02	24796705	T	C	INTERGENIC	NA	T/T	3,0	T/C	4,56	T/C	38,32	C|C	0,12	NA
Chr02	24796712	T	C	INTERGENIC	NA	T/T	2,0	T/C	4,56	T/C	38,32	C|C	0,12	NA
Chr02	24796730	C	T	INTERGENIC	NA	C/C	2,0	C/T	4,60	C/T	37,33	T|T	0,9	NA
Chr02	24796819	C	A	INTERGENIC	NA	C/C	1,0	C/A	4,64	C/A	43,27	A/A	0,15	NA
Chr02	24796840	A	G	INTERGENIC	NA	A/A	1,0	A/G	3,65	A/G	42,24	G/G	0,10	NA
Chr02	24796861	G	A	INTERGENIC	NA	G/G	1,0	G/A	3,61	G/A	37,27	A/A	0,11	NA
Chr02	24796880	T	C	INTERGENIC	NA	T/T	1,0	T/C	3,61	T/C	41,23	C/C	0,14	NA
Chr02	24796891	G	A	INTERGENIC	NA	G/G	1,0	G/A	3,61	G/A	41,23	A|A	0,14	NA
Chr02	24796893	C	G	INTERGENIC	NA	C/C	1,0	C/G	3,61	C/G	41,23	G|G	0,14	NA
Chr02	24796900	A	G	INTERGENIC	NA	A/A	1,0	A/G	3,61	A/G	40,24	G|G	0,14	NA
Chr02	24796901	A	G	INTERGENIC	NA	A/A	1,0	A/G	3,61	A/G	40,24	G|G	0,14	NA
Chr02	24796916	G	T	INTERGENIC	NA	G/G	1,0	G/T	3,57	G/T	44,22	T/T	0,15	NA
Chr02	24796938	C	G	INTERGENIC	NA	C/C	2,0	C/G	2,62	C/G	42,26	G|G	0,15	NA
Chr02	24796943	A	G	INTERGENIC	NA	A/A	1,0	A/G	2,60	A/G	42,26	G|G	0,16	NA
Chr02	24796949	A	C	INTERGENIC	NA	A/A	1,0	A/C	2,60	A/C	42,26	C|C	0,16	NA
Chr02	24796965	T	C	INTERGENIC	NA	T/T	1,0	T/C	2,60	T/C	47,25	C/C	0,14	NA
Chr02	24796984	T	C	INTERGENIC	NA	T/T	1,0	T/C	2,56	T/C	45,27	C|C	0,15	NA
Chr02	24796985	C	T	INTERGENIC	NA	C/C	1,0	C/T	2,56	C/T	45,27	T|T	0,15	NA
Chr02	24797018	G	T	INTERGENIC	NA	G/G	3,0	G/T	2,58	G/T	41,31	T|T	0,15	NA
Chr02	24797022	G	A	INTERGENIC	NA	G/G	3,0	G/A	2,58	G/A	42,30	A|A	0,15	NA
Chr02	24797049	T	C	INTERGENIC	NA	T/T	3,0	T/C	2,60	T/C	38,34	C/C	0,15	NA
Chr02	24797105	A	G	INTERGENIC	NA	A/A	2,0	A/G	2,60	A/G	38,32	G/G	0,11	NA
Chr02	24797214	C	T	INTERGENIC	NA	C/C	1,0	C/T	2,62	C/T	40,32	T|T	0,12	NA
Chr02	24797219	A	G	INTERGENIC	NA	A/A	1,0	A/G	2,62	A/G	39,33	G|G	0,11	NA
Chr02	24797227	A	T	INTERGENIC	NA	A/A	1,0	A/T	2,62	A/T	40,32	T|T	0,10	NA
Chr02	24797276	T	G	INTERGENIC	NA	T/T	2,0	T/G	2,66	T/G	39,31	G/G	0,12	NA
Chr02	24797293	T	C	INTERGENIC	NA	T/T	2,0	T/C	3,65	T/C	43,29	C/C	0,11	NA
Chr02	24797318	T	C	INTERGENIC	NA	T/T	1,0	T/C	3,65	T/C	44,28	C|C	0,11	NA
Chr02	24797328	A	G	INTERGENIC	NA	A/A	1,0	A/G	3,65	A/G	43,27	G|G	0,12	NA
Chr02	24797379	T	G	INTERGENIC	NA	T/T	1,0	T/G	5,61	T/G	43,27	G/G	0,10	NA
Chr02	24797393	G	A	INTERGENIC	NA	G/G	1,0	G/A	4,64	G/A	43,29	A/A	0,9	NA
Chr02	24797439	T	C	INTERGENIC	NA	T/T	3,0	T/C	3,65	T/C	35,35	C|C	0,11	NA
Chr02	24797441	G	A	INTERGENIC	NA	G/G	3,0	G/A	3,65	G/A	35,35	A|A	0,11	NA
Chr02	24797453	A	G	INTERGENIC	NA	A/A	3,0	A/G	3,65	A/G	35,35	G|G	0,11	NA
Chr02	24797455	T	A	INTERGENIC	NA	T/T	3,0	T/A	3,65	T/A	35,35	A|A	0,11	NA
Chr02	24797457	T	C	INTERGENIC	NA	T/T	3,0	T/C	3,65	T/C	35,35	C|C	0,11	NA
Chr02	24797483	G	A	INTERGENIC	NA	G/G	3,0	G/A	3,65	G/A	33,33	A/A	0,9	NA
Chr02	24797494	G	A	INTERGENIC	NA	G/G	3,0	G/A	3,65	G/A	34,34	A/A	0,9	NA
Chr02	24797518	A	C	INTERGENIC	NA	A/A	4,0	A/C	3,63	A/C	36,32	C|C	0,5	NA
Chr02	24797525	A	G	INTERGENIC	NA	A/A	4,0	A/G	3,63	A/G	36,32	G|G	0,4	NA
Chr02	24797554	G	A	INTERGENIC	NA	G/G	2,0	G/A	4,56	G/A	41,23	A/A	0,3	NA
Chr02	24797621	G	A	INTERGENIC	NA	G/G	2,0	G/A	4,42	G/A	49,19	A/A	0,1	NA
Chr02	24797642	G	T	INTERGENIC	NA	G/G	3,0	G/T	4,42	G/T	47,21	T/T	0,4	NA
Chr02	24797720	C	G	INTERGENIC	NA	C/C	2,0	C/G	3,65	C/G	37,33	G/G	0,11	NA
Chr02	24797738	C	T	INTERGENIC	NA	C/C	2,0	C/T	3,61	C/T	37,33	T/T	0,12	NA
Chr02	24797773	G	A	INTERGENIC	NA	G/G	1,0	G/A	3,61	G/A	33,35	A/A	0,14	NA
Chr02	24797807	G	C	INTERGENIC	NA	G/G	2,0	G/C	2,62	G/C	36,34	C/C	0,17	NA
Chr02	24797824	T	C	INTERGENIC	NA	T/T	2,0	T/C	2,64	T/C	36,34	C|C	0,17	NA
Chr02	24797833	T	C	INTERGENIC	NA	T/T	1,0	T/C	2,64	T/C	37,33	C|C	0,17	NA
Chr02	24797865	C	G	INTERGENIC	NA	C/C	1,0	C/G	2,66	C/G	38,30	G|G	0,16	NA
Chr02	24797874	T	G	INTERGENIC	NA	T/T	1,0	T/G	2,66	T/G	38,30	G|G	0,17	NA
Chr02	24797962	T	C	INTERGENIC	NA	T/T	1,0	T/C	4,64	T/C	36,32	C/C	0,17	NA
Chr02	24797989	C	T	INTERGENIC	NA	C/C	2,0	C/T	4,64	C/T	38,32	T/T	0,17	NA
Chr02	24798079	G	A	INTERGENIC	NA	G/G	2,0	G/A	3,61	G/A	35,33	A/A	0,18	NA
Chr02	24798100	T	C	INTERGENIC	NA	T/T	2,0	T/C	3,61	T/C	35,33	C|C	0,19	NA
Chr02	24798108	T	A	INTERGENIC	NA	T/T	2,0	T/A	3,61	T/A	34,34	A|A	0,18	NA
Chr02	24798110	T	C	INTERGENIC	NA	T/T	2,0	T/C	3,61	T/C	34,34	C|C	0,18	NA
Chr02	24798152	G	A	INTERGENIC	NA	G/G	2,0	G/A	2,62	G/A	34,34	A/A	0,25	NA
Chr02	24798219	G	T	INTERGENIC	NA	G/G	3,0	G/T	2,64	G/T	32,38	T/T	0,25	NA
Chr02	24798278	G	A	INTERGENIC	NA	G/G	3,0	G/A	2,70	G/A	36,34	A/A	0,23	NA
Chr02	24798313	A	G	INTERGENIC	NA	A/A	4,0	A/G	2,66	A/G	36,34	G/G	0,16	NA
Chr02	24798331	A	G	INTERGENIC	NA	A/A	3,0	A/G	2,66	A/G	33,37	G|G	0,17	NA
Chr02	24798334	A	G	INTERGENIC	NA	A/A	3,0	A/G	2,66	A/G	32,38	G|G	0,18	NA
Chr02	24798375	G	A	INTERGENIC	NA	G/G	3,0	G/A	2,64	G/A	33,35	A|A	0,13	NA
Chr02	24798385	G	T	INTERGENIC	NA	G/G	3,0	G/T	2,64	G/T	33,33	T|T	0,12	NA
Chr02	24798403	A	T	INTERGENIC	NA	A/A	3,0	A/T	1,67	A/T	36,32	T|T	0,12	NA
Chr02	24798408	G	A	INTERGENIC	NA	G/G	3,0	G/A	1,67	G/A	38,32	A|A	0,12	NA
Chr02	24798435	T	A	INTERGENIC	NA	T/T	3,0	T/A	2,64	T/A	37,33	A/A	0,9	NA
Chr02	24798463	A	G	INTERGENIC	NA	A/A	3,0	A/G	2,62	A/G	32,34	G/G	0,9	NA
Chr02	24798555	T	A	INTERGENIC	NA	T/T	5,0	T/A	2,66	T/A	34,34	A|A	0,14	NA
Chr02	24798565	T	G	INTERGENIC	NA	T/T	5,0	T/G	2,66	T/G	32,34	G|G	0,14	NA
Chr02	24798595	G	A	INTERGENIC	NA	G/G	7,0	G/A	2,70	G/A	34,34	A/A	0,15	NA
Chr02	24798611	C	T	INTERGENIC	NA	C/C	7,0	C/T	2,70	C/T	36,32	T/T	0,14	NA
Chr02	24798622	C	T	INTERGENIC	NA	C/C	7,0	C/T	2,70	C/T	36,32	T/T	0,12	NA
Chr02	24798634	A	G	INTERGENIC	NA	A/A	7,0	A/G	2,68	A/G	35,33	G/G	0,10	NA
Chr02	24798661	C	A	INTERGENIC	NA	C/C	7,0	C/A	2,68	C/A	39,31	A|A	0,7	NA
Chr02	24798665	T	C	INTERGENIC	NA	T/T	7,0	T/C	2,68	T/C	38,32	C|C	0,7	NA
Chr02	24798666	A	G	INTERGENIC	NA	A/A	7,0	A/G	2,68	A/G	36,32	G|G	0,7	NA
Chr02	24798697	T	C	INTERGENIC	NA	T/T	4,0	T/C	2,66	T/C	37,27	C/C	0,4	NA
Chr02	24798711	A	G	INTERGENIC	NA	A/A	4,0	A/G	2,64	A/G	39,25	G/G	0,4	NA
Chr02	24798732	C	T	INTERGENIC	NA	C/C	1,0	C/T	2,60	C/T	36,26	T|T	0,4	NA
Chr02	24798738	C	T	INTERGENIC	NA	C/C	1,0	C/T	2,60	C/T	35,25	T|T	0,4	NA
Chr02	24798757	A	C	INTERGENIC	NA	A/A	2,0	A/C	2,60	A/C	37,23	C/C	0,4	NA
Chr02	24798772	T	G	INTERGENIC	NA	T/T	2,0	T/G	2,58	T/G	34,26	G|G	0,4	NA
Chr02	24798777	A	C	INTERGENIC	NA	A/A	2,0	A/C	2,58	A/C	33,27	C|C	0,5	NA
Chr02	24798778	G	A	INTERGENIC	NA	G/G	2,0	G/A	2,58	G/A	33,27	A|A	0,5	NA
Chr02	24798779	A	C	INTERGENIC	NA	A/A	2,0	A/C	2,58	A/C	33,27	C|C	0,5	NA
Chr02	24798802	T	G	INTERGENIC	NA	T/T	2,0	T/G	1,55	T/G	33,27	G/G	0,8	NA
Chr02	24798835	T	G	INTERGENIC	NA	T/T	2,0	T/G	2,60	T/G	30,28	G/G	0,9	NA
Chr02	24798869	G	C	INTERGENIC	NA	G/G	2,0	G/C	2,60	G/C	35,25	C/C	0,10	NA
Chr02	24798994	T	C	INTERGENIC	NA	T/T	2,0	T/C	2,58	T/C	35,29	C|C	0,16	NA
Chr02	24799002	C	T	INTERGENIC	NA	C/C	2,0	C/T	2,58	C/T	37,29	T|T	0,16	NA
Chr02	24799014	A	T	INTERGENIC	NA	A/A	3,0	A/T	2,58	A/T	37,29	T/T	0,16	NA
Chr02	24799025	C	T	INTERGENIC	NA	C/C	4,0	C/T	2,58	C/T	35,31	T/T	0,17	NA
Chr02	24799036	C	G	INTERGENIC	NA	C/C	4,0	C/G	2,60	C/G	37,31	G|G	0,16	NA
Chr02	24799046	A	C	INTERGENIC	NA	A/A	4,0	A/C	2,60	A/C	35,31	C|C	0,15	NA
Chr02	24799067	C	A	INTERGENIC	NA	C/C	4,0	C/A	2,62	C/A	35,31	A/A	0,17	NA
Chr02	24799099	T	C	INTERGENIC	NA	T/T	7,0	T/C	2,58	T/C	34,32	C|C	0,12	NA
Chr02	24799100	T	A	INTERGENIC	NA	T/T	7,0	T/A	2,58	T/A	34,32	A|A	0,12	NA
Chr02	24799132	G	A	INTERGENIC	NA	G/G	6,0	G/A	3,59	G/A	36,32	A/A	0,10	NA
Chr02	24799152	T	C	INTERGENIC	NA	T/T	5,0	T/C	2,60	T/C	33,33	C|C	0,11	NA
Chr02	24799199	T	C	INTERGENIC	NA	T/T	3,0	T/C	2,62	T/C	32,34	C|C	0,12	NA
Chr02	24799201	A	T	INTERGENIC	NA	A/A	3,0	A/T	2,62	A/T	34,34	T|T	0,12	NA
Chr02	24799207	G	A	INTERGENIC	NA	G/G	3,0	G/A	2,62	G/A	32,34	A|A	0,11	NA
Chr02	24799224	G	A	INTERGENIC	NA	G/G	3,0	G/A	2,62	G/A	34,34	A|A	0,9	NA
Chr02	24799290	A	G	INTERGENIC	NA	A/A	1,0	A/G	2,70	A/G	39,33	G/G	0,13	NA
Chr02	24799326	A	G	INTERGENIC	NA	A/A	2,0	A/G	3,65	A/G	38,34	G/G	0,15	NA
Chr02	24799339	A	G	INTERGENIC	NA	A/A	3,0	A/G	2,66	A/G	36,34	G/G	0,15	NA
Chr02	24799357	A	G	INTERGENIC	NA	A/A	4,0	A/G	2,64	A/G	35,35	G/G	0,16	NA
Chr02	24799373	G	T	INTERGENIC	NA	G/G	4,0	G/T	2,66	G/T	34,32	T/T	0,16	NA
Chr02	24799384	A	G	INTERGENIC	NA	A/A	5,0	A/G	2,66	A/G	32,34	G|G	0,15	NA
Chr02	24799404	C	A	INTERGENIC	NA	C/C	4,0	C/A	2,66	C/A	34,36	A/A	0,17	NA
Chr02	24799441	C	A	INTERGENIC	NA	C/C	6,0	C/A	2,66	C/A	31,35	A/A	0,18	NA
Chr02	24799452	C	T	INTERGENIC	NA	C/C	5,0	C/T	2,66	C/T	34,34	T/T	0,18	NA
Chr02	24799471	A	G	INTERGENIC	NA	A/A	8,0	A/G	2,66	A/G	34,32	G|G	0,17	NA
Chr02	24799477	A	C	INTERGENIC	NA	A/A	9,0	A/C	2,66	A/C	32,32	C|C	0,17	NA
Chr02	24799510	A	G	INTERGENIC	NA	A/A	7,0	A/G	3,61	A/G	33,35	G/G	0,17	NA
Chr02	24799536	G	C	INTERGENIC	NA	G/G	6,0	G/C	2,62	G/C	31,39	C/C	0,20	NA
Chr02	24799587	T	A	INTERGENIC	NA	T/T	7,0	T/A	3,69	T/A	35,35	A|A	0,18	NA
Chr02	24799594	T	C	INTERGENIC	NA	T/T	7,0	T/C	3,69	T/C	33,35	C|C	0,19	NA
Chr02	24799628	G	A	INTERGENIC	NA	G/G	4,0	G/A	3,67	G/A	30,38	A/A	0,20	NA
Chr02	24799645	T	A	INTERGENIC	NA	T/T	6,0	T/A	3,67	T/A	32,38	A|A	0,19	NA
Chr02	24799648	T	G	INTERGENIC	NA	T/T	6,0	T/G	3,67	T/G	32,38	G|G	0,19	NA
Chr02	24799674	A	G	INTERGENIC	NA	A/A	6,0	A/G	4,62	A/G	32,36	G|G	0,20	NA
Chr02	24799682	C	T	INTERGENIC	NA	C/C	6,0	C/T	3,63	C/T	32,36	T|T	0,21	NA
Chr02	24799773	G	A	INTERGENIC	NA	G/G	6,0	G/A	3,61	G/A	36,36	A|A	0,24	NA
Chr02	24799881	A	G	INTERGENIC	NA	A/A	6,0	A/G	1,69	A/G	33,39	G|G	0,20	NA
Chr02	24799889	A	C	INTERGENIC	NA	A/A	7,0	A/C	1,69	A/C	33,39	C|C	0,22	NA
Chr02	24799915	T	C	INTERGENIC	NA	T/T	4,0	T/C	2,64	T/C	34,36	C/C	0,20	NA
Chr02	24799945	T	G	INTERGENIC	NA	T/T	6,0	T/G	3,63	T/G	32,38	G/G	0,18	NA
Chr02	24799962	G	A	INTERGENIC	NA	G/G	5,0	G/A	3,63	G/A	33,37	A/A	0,15	NA
Chr02	24800031	A	G	INTERGENIC	NA	A/A	3,0	A/G	3,67	A/G	35,35	G/G	0,11	NA
Chr02	24800067	A	G	INTERGENIC	NA	A/A	3,0	A/G	2,66	A/G	34,38	G|G	0,13	NA
Chr02	24800070	A	G	INTERGENIC	NA	A/A	3,0	A/G	2,66	A/G	34,38	G|G	0,13	NA
Chr02	24800082	T	C	INTERGENIC	NA	T/T	1,0	T/C	2,66	T/C	33,39	C/C	0,14	NA
Chr02	24800146	T	C	INTERGENIC	NA	T/T	2,0	T/C	4,58	T/C	32,38	C/C	0,12	NA
Chr02	24800178	C	T	INTERGENIC	NA	C/C	2,0	C/T	4,64	C/T	34,38	T/T	0,15	NA
Chr02	24800236	A	C	INTERGENIC	NA	A/A	2,0	A/C	3,61	A/C	36,36	C|C	0,15	NA
Chr02	24800243	T	G	INTERGENIC	NA	T/T	2,0	T/G	3,61	T/G	37,35	G|G	0,15	NA
Chr02	24800256	T	A	INTERGENIC	NA	T/T	3,0	T/A	2,60	T/A	36,36	A|A	0,16	NA
Chr02	24800258	T	G	INTERGENIC	NA	T/T	3,0	T/G	2,60	T/G	36,36	G|G	0,16	NA
Chr02	24800269	A	G	INTERGENIC	NA	A/A	3,0	A/G	2,64	A/G	35,35	G|G	0,18	NA
Chr02	24800273	C	G	INTERGENIC	NA	C/C	4,0	C/G	2,64	C/G	36,34	G|G	0,19	NA
Chr02	24800328	G	T	INTERGENIC	NA	G/G	3,0	G/T	2,68	G/T	35,37	T|T	0,21	NA
Chr02	24800329	C	T	INTERGENIC	NA	C/C	3,0	C/T	2,68	C/T	35,37	T|T	0,21	NA
Chr02	24800377	T	C	INTERGENIC	NA	T/T	3,0	T/C	2,66	T/C	38,34	C|C	0,16	NA
Chr02	24800387	C	G	INTERGENIC	NA	C/C	4,0	C/G	2,68	C/G	37,35	G|G	0,17	NA
Chr02	24800407	G	T	INTERGENIC	NA	G/G	5,0	G/T	2,70	G/T	36,36	T|T	0,18	NA
Chr02	24800408	T	G	INTERGENIC	NA	T/T	5,0	T/G	2,70	T/G	36,36	G|G	0,18	NA
Chr02	24800412	G	T	INTERGENIC	NA	G/G	4,0	G/T	2,70	G/T	36,36	T|T	0,19	NA
Chr02	24800421	G	C	INTERGENIC	NA	G/G	4,0	G/C	2,70	G/C	36,36	C|C	0,19	NA
Chr02	24800456	G	A	INTERGENIC	NA	G/G	5,0	G/A	4,64	G/A	37,35	A/A	0,15	NA
Chr02	24800472	C	T	INTERGENIC	NA	C/C	5,0	C/T	3,67	C/T	36,34	T|T	0,14	NA
Chr02	24800480	A	G	INTERGENIC	NA	A/A	5,0	A/G	3,67	A/G	39,33	G|G	0,18	NA
Chr02	24800543	G	C	INTERGENIC	NA	G/G	3,0	G/C	2,64	G/C	32,38	C|C	0,22	NA
Chr02	24800546	A	C	INTERGENIC	NA	A/A	3,0	A/C	2,64	A/C	31,39	C|C	0,23	NA
Chr02	24800551	C	A	INTERGENIC	NA	C/C	3,0	C/A	2,64	C/A	32,38	A|A	0,21	NA
Chr02	24800556	A	G	INTERGENIC	NA	A/A	3,0	A/G	2,64	A/G	32,38	G|G	0,22	NA
Chr02	24800568	A	T	INTERGENIC	NA	A/A	4,0	A/T	3,63	A/T	31,41	T/T	0,22	NA
Chr02	24800631	T	C	INTERGENIC	NA	T/T	4,0	T/C	1,63	T/C	35,37	C|C	0,23	NA
Chr02	24800638	T	C	INTERGENIC	NA	T/T	4,0	T/C	1,63	T/C	35,37	C|C	0,25	NA
Chr02	24800643	C	T	INTERGENIC	NA	C/C	4,0	C/T	1,65	C/T	35,37	T|T	0,25	NA
Chr02	24800651	T	G	INTERGENIC	NA	T/T	4,0	T/G	3,63	T/G	33,37	G|G	0,25	NA
Chr02	24800696	G	C	INTERGENIC	NA	G/G	5,0	G/C	3,61	G/C	33,37	C|C	0,18	NA
Chr02	24800741	T	C	INTERGENIC	NA	T/T	7,0	T/C	3,63	T/C	27,37	C/C	0,14	NA
Chr02	24800752	T	C	INTERGENIC	NA	T/T	7,0	T/C	3,63	T/C	27,39	C|C	0,14	NA
Chr02	24800757	T	A	INTERGENIC	NA	T/T	7,0	T/A	3,63	T/A	29,39	A|A	0,14	NA
Chr02	24800897	G	T	INTERGENIC	NA	G/G	3,0	G/T	1,65	G/T	31,33	T|T	0,12	NA
Chr02	24800913	A	G	INTERGENIC	NA	A/A	4,0	A/G	1,65	A/G	32,32	G|G	0,13	NA
Chr02	24800927	A	C	INTERGENIC	NA	A/A	3,0	A/C	1,65	A/C	33,29	C|C	0,13	NA
Chr02	24800940	C	T	INTERGENIC	NA	C/C	3,0	C/T	1,65	C/T	37,29	T|T	0,14	NA
Chr02	24800941	C	T	INTERGENIC	NA	C/C	3,0	C/T	1,65	C/T	37,29	T|T	0,14	NA
Chr02	24800947	G	T	INTERGENIC	NA	G/G	3,0	G/T	1,65	G/T	35,29	T|T	0,13	NA
Chr02	24800969	A	G	INTERGENIC	NA	A/A	2,0	A/G	3,57	A/G	36,28	G|G	0,14	NA
Chr02	24800999	T	C	INTERGENIC	NA	T/T	3,0	T/C	1,57	T/C	40,28	C|C	0,14	NA
Chr02	24801007	T	A	INTERGENIC	NA	T/T	4,0	T/A	1,55	T/A	38,30	A|A	0,14	NA
Chr02	24801013	T	C	INTERGENIC	NA	T/T	4,0	T/C	1,55	T/C	38,30	C|C	0,13	NA
Chr02	24801018	C	T	INTERGENIC	NA	C/C	4,0	C/T	1,55	C/T	38,30	T|T	0,12	NA
Chr02	24801028	C	T	INTERGENIC	NA	C/C	4,0	C/T	1,55	C/T	38,30	T|T	0,11	NA
Chr02	24801032	A	G	INTERGENIC	NA	A/A	4,0	A/G	1,55	A/G	40,30	G|G	0,11	NA
Chr02	24801044	G	C	INTERGENIC	NA	G/G	4,0	C/C	0,56	G/C	40,28	C|C	0,11	NA
Chr02	24801047	T	C	INTERGENIC	NA	T/T	4,0	C/C	0,56	T/C	42,28	C|C	0,11	NA
Chr02	24801107	G	A	INTERGENIC	NA	G/G	5,0	A/A	0,56	G/A	33,29	A|A	0,6	NA
Chr02	24801170	T	C	INTERGENIC	NA	T/T	4,0	T/C	2,62	T/C	39,29	C/C	0,10	NA
Chr02	24801198	C	T	INTERGENIC	NA	C/C	5,0	C/T	3,59	C/T	38,26	T|T	0,11	NA
Chr02	24801209	C	T	INTERGENIC	NA	C/C	5,0	C/T	3,55	C/T	41,25	T|T	0,14	NA
Chr02	24801247	A	T	INTERGENIC	NA	A/A	3,0	A/T	3,61	A/T	36,30	T|T	0,14	NA
Chr02	24801251	C	T	INTERGENIC	NA	C/C	3,0	C/T	3,61	C/T	36,30	T|T	0,14	NA
Chr02	24801279	A	G	INTERGENIC	NA	A/A	4,0	A/G	3,59	A/G	35,29	G|G	0,12	NA
Chr02	24801292	A	G	INTERGENIC	NA	A/A	3,0	A/G	3,57	A/G	34,28	G|G	0,13	NA
Chr02	24801299	T	A	INTERGENIC	NA	T/T	3,0	T/A	3,53	T/A	32,28	A|A	0,12	NA
Chr02	24801318	T	A	INTERGENIC	NA	T/T	1,0	T/A	3,45	T/A	31,27	A|A	0,11	NA
Chr02	24801341	T	A	INTERGENIC	NA	T/T	1,0	T/A	3,43	T/A	28,22	A|A	0,14	NA
Chr02	24801349	A	G	INTERGENIC	NA	A/A	1,0	A/G	3,43	A/G	33,21	G|G	0,14	NA
Chr02	24801355	A	T	INTERGENIC	NA	A/A	1,0	A/T	3,43	A/T	30,22	T|T	0,11	NA
Chr02	24801366	A	T	INTERGENIC	NA	A/A	1,0	A/T	3,41	A/T	32,20	T|T	0,10	NA
Chr02	24801389	C	T	INTERGENIC	NA	C/C	2,0	C/T	2,40	C/T	36,18	T|T	0,11	NA
Chr02	24801390	T	C	INTERGENIC	NA	T/T	2,0	T/C	16,26	T/C	42,12	C|C	0,11	NA
Chr02	24801498	T	A	INTERGENIC	NA	T/T	2,0	T/A	1,63	T/A	41,27	A/A	0,10	NA
Chr02	24801518	A	G	INTERGENIC	NA	A/A	2,0	A/G	1,63	A/G	34,30	G/G	0,9	NA
Chr02	24801548	T	C	INTERGENIC	NA	T/T	1,0	T/C	2,66	T/C	40,28	C/C	0,13	NA
Chr02	24801577	A	G	INTERGENIC	NA	A/A	1,0	A/G	1,61	A/G	40,30	G/G	0,14	NA
Chr02	24801683	G	A	INTERGENIC	NA	G/G	2,0	G/A	2,64	G/A	35,35	A|A	0,21	NA
Chr02	24801707	G	A	INTERGENIC	NA	G/G	2,0	G/A	2,62	G/A	38,34	A|A	0,19	NA
Chr02	24801737	T	C	INTERGENIC	NA	T/T	2,0	T/C	2,58	T/C	38,30	C|C	0,13	NA
Chr02	24801754	T	C	INTERGENIC	NA	T/T	2,0	T/C	2,58	T/C	41,29	C|C	0,14	NA
Chr02	24801778	A	G	INTERGENIC	NA	A/A	2,0	A/G	2,56	A/G	41,25	G|G	0,17	NA
Chr02	24801984	G	C	INTERGENIC	NA	G/G	2,0	G/C	1,59	G/C	32,30	C|C	0,10	NA
Chr02	24801993	A	C	INTERGENIC	NA	A/A	3,0	A/C	1,59	A/C	30,30	C|C	0,11	NA
Chr02	24801997	T	C	INTERGENIC	NA	T/T	3,0	T/C	3,59	T/C	28,30	C|C	0,11	NA
Chr02	24801998	G	T	INTERGENIC	NA	G/G	3,0	G/T	1,59	G/T	26,30	T|T	0,11	NA
Chr02	24802050	G	T	INTERGENIC	NA	G/G	4,0	G/T	1,57	G/T	32,38	T|T	0,9	NA
Chr02	24802057	G	A	INTERGENIC	NA	G/G	4,0	G/A	1,57	G/A	30,38	A|A	0,9	NA
Chr02	24802063	A	G	INTERGENIC	NA	A/A	4,0	A/G	1,59	A/G	28,40	G|G	0,9	NA
Chr02	24802105	C	T	INTERGENIC	NA	C/C	6,0	C/T	1,57	C/T	36,34	T|T	0,6	NA
Chr02	24802111	C	A	INTERGENIC	NA	C/C	6,0	C/A	1,57	C/A	36,34	A|A	0,6	NA
Chr02	24802139	T	A	INTERGENIC	NA	T/T	5,0	T/A	1,57	T/A	35,31	A/A	0,3	NA
Chr02	24802182	T	C	INTERGENIC	NA	T/T	3,0	T/C	1,61	T/C	46,26	C/C	0,4	NA
Chr02	24802234	C	T	INTERGENIC	NA	C/C	3,0	C/T	1,47	C/T	38,22	T|T	0,6	NA
Chr02	24802245	A	C	INTERGENIC	NA	A/A	3,0	A/C	1,47	A/C	42,22	C|C	0,7	NA
Chr02	24802258	C	T	INTERGENIC	NA	C/C	3,0	C/T	1,45	C/T	36,24	T|T	0,7	NA
Chr02	24802355	C	T	INTERGENIC	NA	C/C	3,0	C/T	1,51	C/T	37,23	T|T	0,11	NA
Chr02	24802367	T	A	INTERGENIC	NA	T/T	3,0	T/A	1,47	T/A	37,23	A|A	0,11	NA
Chr02	24802368	G	T	INTERGENIC	NA	G/G	3,0	G/T	1,47	G/T	35,23	T|T	0,11	NA
Chr02	24802371	A	G	INTERGENIC	NA	A/A	3,0	A/G	1,47	A/G	34,22	G|G	0,12	NA
Chr02	24802379	T	C	INTERGENIC	NA	T/T	3,0	T/C	1,47	T/C	34,22	C|C	0,11	NA
Chr02	24802421	T	G	INTERGENIC	NA	T/T	5,0	T/G	1,51	T/G	33,25	G|G	0,10	NA
Chr02	24802446	G	A	INTERGENIC	NA	G/G	5,0	G/A	1,45	G/A	32,26	A|A	0,9	NA
Chr02	24802447	T	C	INTERGENIC	NA	T/T	4,0	T/C	1,45	T/C	32,26	C|C	0,9	NA
Chr02	24802460	G	C	INTERGENIC	NA	G/G	4,0	G/C	3,45	G/C	33,27	C|C	0,8	NA
Chr02	24802499	G	C	INTERGENIC	NA	G/G	5,0	G/C	1,41	G/C	34,28	C|C	0,7	NA
Chr02	24802501	A	G	INTERGENIC	NA	A/A	5,0	A/G	1,41	A/G	32,28	G|G	0,7	NA
Chr02	24802505	C	T	INTERGENIC	NA	C/C	5,0	C/T	1,41	C/T	32,28	T|T	0,7	NA
Chr02	24802510	G	C	INTERGENIC	NA	G/G	6,0	G/C	1,41	G/C	32,28	C|C	0,8	NA
Chr02	24802703	C	T	INTERGENIC	NA	C/C	1,0	C/T	3,37	C/T	48,22	T|T	0,4	NA
Chr02	24802710	C	T	INTERGENIC	NA	C/C	1,0	C/T	3,37	C/T	49,19	T|T	0,4	NA
Chr02	24802713	C	T	INTERGENIC	NA	C/C	1,0	C/T	3,37	C/T	49,19	T|T	0,4	NA
Chr02	24802727	A	T	INTERGENIC	NA	A/A	2,0	A/T	3,37	A/T	49,19	T|T	0,4	NA
Chr02	24802735	A	G	INTERGENIC	NA	A/A	2,0	A/G	3,37	A/G	49,19	G|G	0,4	NA
Chr02	24802746	G	A	INTERGENIC	NA	G/G	1,0	G/A	41,15	G/A	55,15	A|A	0,4	NA
Chr02	24802765	T	A	INTERGENIC	NA	T/T	1,0	T/A	3,37	T/A	52,16	A|A	0,2	NA
Chr02	24802769	A	G	INTERGENIC	NA	A/A	1,0	A/G	3,37	A/G	52,16	G|G	0,1	NA
Chr02	24802770	C	T	INTERGENIC	NA	C/C	1,0	C/T	38,16	C/T	56,14	T|T	0,1	NA
Chr02	24802772	A	G	INTERGENIC	NA	A/A	1,0	A/G	3,37	A/G	52,16	G|G	0,1	NA
Chr02	24802789	A	C	INTERGENIC	NA	A/A	2,0	A/C	3,37	A/C	50,16	C|C	0,3	NA
Chr02	24802796	T	C	INTERGENIC	NA	T/T	2,0	T/C	3,37	T/C	48,16	C|C	0,5	NA
Chr02	24802800	C	G	INTERGENIC	NA	C/C	2,0	C/G	3,37	C/G	47,15	G|G	0,6	NA
Chr02	24802807	G	T	INTERGENIC	NA	G/G	2,0	G/T	3,37	G/T	46,16	T|T	0,7	NA
Chr02	24802817	T	C	INTERGENIC	NA	T/T	4,0	T/C	3,37	T/C	42,16	C|C	0,8	NA
Chr02	24802821	C	T	INTERGENIC	NA	C/C	4,0	C/T	3,39	C/T	42,16	T|T	0,8	NA
Chr02	24802858	A	G	INTERGENIC	NA	A/A	4,0	A/G	3,57	A/G	39,31	G|G	0,8	NA
Chr02	24802885	G	C	INTERGENIC	NA	G/G	4,0	G/C	3,59	G/C	39,31	C|C	0,9	NA
Chr02	24802976	C	T	INTERGENIC	NA	C/C	5,0	C/T	1,63	C/T	35,33	T/T	0,10	NA
Chr02	24803016	A	G	INTERGENIC	NA	A/A	6,0	A/G	1,59	A/G	37,35	G|G	0,13	NA
Chr02	24803039	G	A	INTERGENIC	NA	G/G	6,0	G/A	3,57	G/A	37,35	A|A	0,13	NA
Chr02	24803040	A	T	INTERGENIC	NA	A/A	6,0	A/T	3,57	A/T	37,35	T|T	0,13	NA
Chr02	24803048	T	C	INTERGENIC	NA	T/T	6,0	T/C	3,57	T/C	37,35	C|C	0,13	NA
Chr02	24803063	T	C	INTERGENIC	NA	T/T	5,0	T/C	3,53	T/C	36,36	C|C	0,10	NA
Chr02	24803068	C	T	INTERGENIC	NA	C/C	5,0	C/T	3,53	C/T	35,35	T|T	0,10	NA
Chr02	24803071	G	T	INTERGENIC	NA	G/G	5,0	G/T	3,53	G/T	37,35	T|T	0,10	NA
Chr02	24803094	A	T	INTERGENIC	NA	A/A	6,0	A/T	3,51	A/T	36,32	T|T	0,11	NA
Chr02	24803099	G	A	INTERGENIC	NA	G/G	6,0	G/A	3,51	G/A	37,31	A|A	0,11	NA
Chr02	24803102	A	G	INTERGENIC	NA	A/A	6,0	A/G	3,51	A/G	39,31	G|G	0,11	NA
Chr02	24803127	A	G	INTERGENIC	NA	A/A	7,0	A/G	3,53	A/G	37,31	G|G	0,12	NA
Chr02	24803156	A	G	INTERGENIC	NA	A/A	6,0	A/G	4,58	A/G	41,27	G/G	0,11	NA
Chr02	24803195	A	G	INTERGENIC	NA	A/A	4,0	A/G	3,63	A/G	38,26	G|G	0,13	NA
Chr02	24803214	T	C	INTERGENIC	NA	T/T	4,0	T/C	3,63	T/C	34,26	C|C	0,13	NA
Chr02	24803223	T	G	INTERGENIC	NA	T/T	3,0	T/G	3,63	T/G	36,26	G|G	0,13	NA
Chr02	24803230	T	C	INTERGENIC	NA	T/T	3,0	T/C	3,63	T/C	32,26	C|C	0,16	NA
Chr02	24803250	C	T	INTERGENIC	NA	C/C	1,0	C/T	3,65	C/T	38,26	T|T	0,14	NA
Chr02	24803283	G	T	INTERGENIC	NA	G/G	1,0	G/T	3,65	G/T	41,31	T/T	0,13	NA
Chr02	24803296	T	C	INTERGENIC	NA	T/T	1,0	T/C	4,60	T/C	42,30	C/C	0,14	NA
Chr02	24803323	C	T	INTERGENIC	NA	C/C	1,0	C/T	4,62	C/T	41,31	T/T	0,14	NA
Chr02	24803334	A	G	INTERGENIC	NA	A/A	1,0	A/G	4,60	A/G	41,31	G/G	0,13	NA
Chr02	24803379	C	T	INTERGENIC	NA	C/C	1,0	C/T	3,63	C/T	36,36	T/T	0,7	NA
Chr02	24803394	C	T	INTERGENIC	NA	C/C	1,0	C/T	3,59	C/T	36,36	T/T	0,8	NA
Chr02	24803416	T	C	INTERGENIC	NA	T/T	2,0	T/C	2,60	T/C	37,35	C|C	0,8	NA
Chr02	24803426	A	G	INTERGENIC	NA	A/A	2,0	A/G	2,60	A/G	37,35	G|G	0,8	NA
Chr02	24803440	T	C	INTERGENIC	NA	T/T	2,0	T/C	1,61	T/C	39,33	C/C	0,7	NA
Chr02	24803473	C	G	INTERGENIC	NA	C/C	2,0	C/G	1,63	C/G	37,33	G/G	0,7	NA
Chr02	24803491	T	C	INTERGENIC	NA	T/T	2,0	T/C	1,65	T/C	35,35	C/C	0,6	NA
Chr02	24803525	G	T	INTERGENIC	NA	G/G	2,0	G/T	1,65	G/T	36,34	T/T	0,7	NA
Chr02	24803558	C	T	INTERGENIC	NA	C/C	2,0	C/T	1,65	C/T	38,30	T/T	0,7	NA
Chr02	24803579	C	T	INTERGENIC	NA	C/C	2,0	C/T	1,69	C/T	43,27	T/T	0,6	NA
Chr02	24803597	T	A	INTERGENIC	NA	T/T	2,0	T/A	1,69	T/A	45,27	A/A	0,6	NA
Chr02	24803608	T	C	INTERGENIC	NA	T/T	2,0	T/C	1,69	T/C	43,27	C/C	0,6	NA
Chr02	24803619	T	G	INTERGENIC	NA	T/T	2,0	T/G	3,65	T/G	38,28	G/G	0,6	NA
Chr02	24803635	C	T	INTERGENIC	NA	C/C	3,0	C/T	1,61	C/T	41,27	T|T	0,6	NA
Chr02	24803643	A	C	INTERGENIC	NA	A/A	2,0	A/C	1,61	A/C	40,28	C|C	0,6	NA
Chr02	24803644	T	C	INTERGENIC	NA	T/T	2,0	T/C	1,61	T/C	38,28	C|C	0,6	NA
Chr02	24803670	C	A	INTERGENIC	NA	C/C	2,0	C/A	1,53	C/A	38,26	A|A	0,4	NA
Chr02	24803675	T	C	INTERGENIC	NA	T/T	1,0	T/C	1,53	T/C	38,26	C|C	0,4	NA
Chr02	24803717	C	T	INTERGENIC	NA	C/C	1,0	C/T	1,55	C/T	35,23	T/T	0,5	NA
Chr02	24803732	G	A	INTERGENIC	NA	G/G	1,0	G/A	1,57	G/A	31,21	A/A	0,5	NA
Chr02	24803819	C	T	INTERGENIC	NA	C/C	1,0	C/T	1,55	C/T	27,21	T|T	0,7	NA
Chr02	24803820	T	C	INTERGENIC	NA	T/T	1,0	T/C	1,55	T/C	27,21	C|C	0,7	NA
Chr02	24803844	G	A	INTERGENIC	NA	G/G	1,0	G/A	2,54	G/A	25,25	A|A	0,7	NA
Chr02	24803852	A	G	INTERGENIC	NA	A/A	1,0	A/G	2,52	A/G	23,27	G|G	0,7	NA
Chr02	24803912	A	C	INTERGENIC	NA	A/A	1,0	A/C	4,36	A/C	16,26	C|C	0,3	NA
Chr02	24803922	T	C	INTERGENIC	NA	T/T	1,0	T/C	4,36	T/C	18,26	C|C	0,5	NA
Chr02	24803929	A	T	INTERGENIC	NA	A/A	1,0	A/T	4,36	A/T	21,25	T|T	0,5	NA
Chr02	24803981	G	T	INTERGENIC	NA	G/G	2,0	G/T	2,42	G/T	27,31	T/T	0,5	NA
Chr02	24804087	G	A	INTERGENIC	NA	G/G	3,0	G/A	3,35	G/A	31,23	A/A	0,6	NA
Chr02	24804145	T	G	INTERGENIC	NA	T/T	2,0	T/G	4,44	T/G	33,33	G/G	0,6	NA
Chr02	24804249	T	G	INTERGENIC	NA	T/T	2,0	T/G	2,54	T/G	36,28	G|G	0,10	NA
Chr02	24804296	A	G	INTERGENIC	NA	A/A	3,0	A/G	2,62	A/G	40,28	G|G	0,8	NA
Chr02	24804319	C	T	INTERGENIC	NA	C/C	4,0	C/T	1,61	C/T	42,28	T|T	0,8	NA
Chr02	24804340	A	G	INTERGENIC	NA	A/A	4,0	A/G	1,59	A/G	39,29	G|G	0,8	NA
Chr02	24804380	T	C	INTERGENIC	NA	T/T	6,0	T/C	4,52	T/C	37,31	C/C	0,8	NA
Chr02	24804467	C	G	INTERGENIC	NA	C/C	5,0	C/G	2,50	C/G	39,27	G/G	0,6	NA
Chr02	24804497	G	T	INTERGENIC	NA	G/G	5,0	G/T	1,51	G/T	38,28	T|T	0,7	NA
Chr02	24804499	T	G	INTERGENIC	NA	T/T	5,0	T/G	1,51	T/G	40,28	G|G	0,7	NA
Chr02	24804506	G	C	INTERGENIC	NA	G/G	6,0	G/C	1,51	G/C	38,28	C|C	0,6	NA
Chr02	24804557	T	G	INTERGENIC	NA	T/T	4,0	T/G	2,44	T/G	36,30	G|G	0,5	NA
Chr02	24804591	T	C	INTERGENIC	NA	T/T	3,0	T/C	2,48	T/C	36,30	C|C	0,6	NA
Chr02	24804595	G	T	INTERGENIC	NA	G/G	3,0	G/T	2,48	G/T	36,30	T|T	0,6	NA
Chr02	24804627	T	C	INTERGENIC	NA	T/T	3,0	T/C	3,57	T/C	37,25	C|C	0,7	NA
Chr02	24804634	A	C	INTERGENIC	NA	A/A	5,0	A/C	3,57	A/C	42,24	C|C	0,7	NA
Chr02	24804695	A	C	INTERGENIC	NA	A/A	4,0	A/C	2,62	A/C	34,24	C|C	0,4	NA
Chr02	24804699	T	A	INTERGENIC	NA	T/T	4,0	T/A	2,62	T/A	40,24	A|A	0,4	NA
Chr02	24804791	C	T	INTERGENIC	NA	C/C	1,0	C/T	4,54	C/T	43,27	T|T	0,5	NA
Chr02	24804799	G	T	INTERGENIC	NA	G/G	1,0	G/T	4,54	G/T	44,26	T|T	0,7	NA
Chr02	24804996	G	A	INTERGENIC	NA	G/G	2,0	G/A	2,66	G/A	30,38	A|A	0,15	NA
Chr02	24805017	C	T	INTERGENIC	NA	C/C	3,0	C/T	2,64	C/T	31,33	T/T	0,17	NA
Chr02	24805048	T	C	INTERGENIC	NA	T/T	3,0	T/C	2,64	T/C	34,36	C|C	0,17	NA
Chr02	24805052	G	T	INTERGENIC	NA	G/G	3,0	G/T	2,64	G/T	34,36	T|T	0,17	NA
Chr02	24805069	T	A	INTERGENIC	NA	T/T	4,0	T/A	2,62	T/A	36,32	A|A	0,18	NA
Chr02	24805076	C	G	INTERGENIC	NA	C/C	4,0	C/G	1,63	C/G	37,31	G|G	0,18	NA
Chr02	24805094	T	G	INTERGENIC	NA	T/T	5,0	T/G	2,66	T/G	37,35	G/G	0,15	NA
Chr02	24805174	G	A	INTERGENIC	NA	G/G	5,0	G/A	2,62	G/A	31,35	A|A	0,11	NA
Chr02	24805184	G	C	INTERGENIC	NA	G/G	6,0	G/C	1,59	G/C	30,36	C|C	0,10	NA
Chr02	24805233	A	G	INTERGENIC	NA	A/A	4,0	A/G	2,62	A/G	32,36	G/G	0,8	NA
Chr02	24805354	G	T	INTERGENIC	NA	G/G	5,0	G/T	1,53	G/T	39,33	T/T	0,4	NA
Chr02	24805366	C	A	INTERGENIC	NA	C/C	5,0	C/A	1,51	C/A	37,33	A/A	0,4	NA
Chr02	24805433	A	G	INTERGENIC	NA	A/A	5,0	A/G	4,44	A/G	40,30	G|G	0,4	NA
Chr02	24805446	G	C	INTERGENIC	NA	G/G	5,0	G/C	3,47	G/C	40,30	C|C	0,3	NA
Chr02	24805484	G	T	INTERGENIC	NA	G/G	3,0	G/T	2,46	G/T	42,22	T|T	0,3	NA
Chr02	24805501	T	G	INTERGENIC	NA	T/T	2,0	T/G	2,42	T/G	44,22	G|G	0,5	NA
Chr02	24805517	T	G	INTERGENIC	NA	T/T	2,0	T/G	2,42	T/G	38,22	G|G	0,5	NA
Chr02	24805520	C	T	INTERGENIC	NA	C/C	2,0	C/T	2,42	C/T	39,21	T|T	0,4	NA
Chr02	24805591	A	T	INTERGENIC	NA	A/A	1,0	A/T	3,49	A/T	36,32	T/T	0,9	NA
Chr02	24805673	G	T	INTERGENIC	NA	G/G	5,0	G/T	5,57	G/T	34,36	T/T	0,13	NA
Chr02	24805783	T	C	INTERGENIC	NA	T/T	4,0	T/C	2,62	T/C	38,30	C|C	0,15	NA
Chr02	24805805	A	G	INTERGENIC	NA	A/A	3,0	A/G	2,60	A/G	41,29	G|G	0,18	NA
Chr02	24805836	G	T	INTERGENIC	NA	G/G	4,0	G/T	2,58	G/T	38,30	T|T	0,16	NA
Chr02	24805839	G	A	INTERGENIC	NA	G/G	4,0	G/A	2,58	G/A	42,30	A|A	0,16	NA
Chr02	24805847	A	G	INTERGENIC	NA	A/A	4,0	A/G	2,58	A/G	40,30	G|G	0,16	NA
Chr02	24805914	C	T	INTERGENIC	NA	C/C	7,0	C/T	4,50	C/T	33,31	T/T	0,13	NA
Chr02	24805944	G	A	INTERGENIC	NA	G/G	7,0	G/A	3,53	G/A	34,32	A|A	0,9	NA
Chr02	24805952	T	C	INTERGENIC	NA	T/T	8,0	T/C	3,53	T/C	35,33	C|C	0,8	NA
Chr02	24805974	C	T	INTERGENIC	NA	C/C	8,0	C/T	3,51	C/T	35,35	T|T	0,7	NA
Chr02	24806030	G	C	INTERGENIC	NA	G/G	5,0	G/C	3,55	G/C	38,30	C/C	0,9	NA
Chr02	24806137	A	G	INTERGENIC	NA	A/A	2,0	A/G	3,61	A/G	34,34	G/G	0,6	NA
Chr02	24806247	G	A	INTERGENIC	NA	G/G	3,0	G/A	3,63	G/A	34,38	A|A	0,6	NA
Chr02	24806255	G	A	INTERGENIC	NA	G/G	3,0	G/A	3,63	G/A	35,37	A|A	0,6	NA
Chr02	24806327	A	G	INTERGENIC	NA	A/A	5,0	A/G	2,64	A/G	36,36	G/G	0,11	NA
Chr02	24806354	C	T	INTERGENIC	NA	C/C	5,0	C/T	1,57	C/T	39,31	T/T	0,10	NA
Chr02	24806396	A	C	INTERGENIC	NA	A/A	5,0	A/C	1,63	A/C	39,33	C/C	0,11	NA
Chr02	24806407	C	A	INTERGENIC	NA	C/C	5,0	C/A	3,63	C/A	39,31	A|A	0,11	NA
Chr02	24806414	A	C	INTERGENIC	NA	A/A	5,0	A/C	1,63	A/C	37,31	C|C	0,12	NA
Chr02	24806475	G	A	INTERGENIC	NA	G/G	4,0	G/A	1,57	G/A	39,29	A|A	0,5	NA
Chr02	24806483	A	G	INTERGENIC	NA	A/A	3,0	A/G	1,55	A/G	43,25	G|G	0,5	NA
Chr02	24806500	C	T	INTERGENIC	NA	C/C	3,0	C/T	1,51	C/T	44,24	T/T	0,5	NA
Chr02	24806515	T	C	INTERGENIC	NA	T/T	3,0	C/C	0,50	T/C	44,24	C|C	0,5	NA
Chr02	24806524	T	C	INTERGENIC	NA	T/T	2,0	C/C	0,48	T/C	46,24	C|C	0,5	NA
Chr02	24806528	C	T	INTERGENIC	NA	C/C	2,0	T/T	0,48	C/T	47,23	T|T	0,5	NA
Chr02	24806676	A	G	INTERGENIC	NA	A/A	3,0	A/G	4,6	A/G	51,5	G|G	0,1	NA
Chr02	24806748	T	C	INTERGENIC	NA	T/T	2,0	T/C	14,6	T/C	57,3	C|C	0,2	NA
Chr02	24806759	A	G	INTERGENIC	NA	A/A	3,0	A/G	20,4	A/G	58,2	G|G	0,2	NA
Chr02	24806782	A	G	INTERGENIC	NA	A/A	4,0	A/G	28,2	A/G	59,1	G|G	0,3	NA
Chr02	24806843	A	G	INTERGENIC	NA	A/A	4,0	A/G	28,4	A/G	57,3	G/G	0,3	NA
Chr02	24810719	A	T	INTERGENIC	NA	A/A	3,0	A/T	8,2	A/A	66,0	T|T	0,2	NA
Chr02	24810721	C	A	INTERGENIC	NA	C/C	3,0	C/A	8,2	C/C	66,0	A|A	0,2	NA
Chr02	24815852	A	T	INTERGENIC	NA	A/A	2,0	A/T	4,34	A/T	43,19	T/T	0,4	NA
Chr02	24815985	A	G	INTERGENIC	NA	A/A	2,0	A/G	39,5	A/G	55,5	G|G	0,4	NA
Chr02	24815986	C	T	INTERGENIC	NA	C/C	2,0	C/T	2,22	C/T	46,10	T|T	0,4	NA
Chr02	24815989	T	C	INTERGENIC	NA	T/T	2,0	T/C	14,16	T/C	46,10	C|C	0,4	NA
Chr02	24816005	A	G	INTERGENIC	NA	A/A	1,0	A/G	26,14	A/G	55,9	G|G	0,4	NA
Chr02	24817087	T	C	INTERGENIC	NA	T/T	6,0	T/C	4,40	T/C	53,11	C|C	0,2	NA
Chr02	24817109	G	C	INTERGENIC	NA	G/G	4,0	G/C	4,40	G/C	49,13	C|C	0,2	NA
Chr02	24817136	T	A	INTERGENIC	NA	T/T	3,0	T/A	4,40	T/A	48,14	A/A	0,2	NA
Chr02	24817277	C	A	INTERGENIC	NA	C/C	2,0	C/A	4,28	C/A	52,8	A/A	0,3	NA
Chr02	24817416	T	C	INTERGENIC	NA	T/T	1,0	T/C	1,31	T/C	52,12	C|C	0,4	NA
Chr02	24817417	C	T	INTERGENIC	NA	C/C	1,0	C/T	1,31	C/T	52,12	T|T	0,4	NA
Chr02	24817531	T	G	INTERGENIC	NA	T/T	1,0	T/G	4,16	T/G	55,7	G|G	0,5	NA
Chr02	24817554	A	C	INTERGENIC	NA	A/A	1,0	A/C	4,16	A/C	56,6	C|C	0,5	NA
Chr02	24817626	C	T	INTERGENIC	NA	C/C	2,0	C/T	3,17	C/T	50,10	T|T	0,3	NA
Chr02	24817635	A	G	INTERGENIC	NA	A/A	2,0	A/G	3,17	A/G	48,10	G|G	0,2	NA
Chr02	24817640	G	A	INTERGENIC	NA	G/G	2,0	G/A	3,17	G/A	50,10	A|A	0,2	NA
Chr02	24817655	G	T	INTERGENIC	NA	G/G	3,0	G/T	24,6	G/T	54,6	T|T	0,2	NA
Chr02	24818102	G	A	INTERGENIC	NA	G/G	4,0	G/A	4,42	G/A	51,13	A/A	0,6	NA
Chr02	24818129	C	T	INTERGENIC	NA	C/C	6,0	C/T	3,51	C/T	46,20	T/T	0,5	NA
Chr02	24818162	A	G	INTERGENIC	NA	A/A	4,0	A/G	3,61	A/G	43,23	G/G	0,6	NA
Chr02	24818237	C	T	INTERGENIC	NA	C/C	3,0	C/T	4,54	C/T	36,30	T/T	0,5	NA
Chr02	24818270	A	T	INTERGENIC	NA	A/A	1,0	A/T	4,54	A/T	40,26	T|T	0,6	NA
Chr02	24818271	T	C	INTERGENIC	NA	T/T	1,0	T/C	4,54	T/C	40,26	C|C	0,6	NA
Chr02	24818298	G	T	INTERGENIC	NA	G/G	1,0	G/T	3,51	G/T	38,28	T|T	0,6	NA
Chr02	24818322	C	G	INTERGENIC	NA	C/C	1,0	C/G	3,51	C/G	42,26	G|G	0,8	NA
Chr02	24818380	T	C	INTERGENIC	NA	T/T	1,0	T/C	3,53	T/C	40,28	C|C	0,12	NA
Chr02	24818381	C	T	INTERGENIC	NA	C/C	1,0	C/T	3,53	C/T	42,28	T|T	0,12	NA
Chr02	24818388	G	A	INTERGENIC	NA	G/G	1,0	G/A	3,53	G/A	43,27	A|A	0,12	NA
Chr02	24818392	C	T	INTERGENIC	NA	C/C	1,0	C/T	3,53	C/T	42,28	T|T	0,12	NA
Chr02	24818625	C	T	INTERGENIC	NA	C/C	2,0	C/T	2,66	C/T	32,36	T/T	0,6	NA
Chr02	24818694	C	T	INTERGENIC	NA	C/C	1,0	C/T	2,68	C/T	34,38	T/T	0,10	NA
Chr02	24818804	T	C	INTERGENIC	NA	T/T	4,0	T/C	2,66	T/C	38,32	C/C	0,9	NA
Chr02	24818834	T	C	INTERGENIC	NA	T/T	5,0	T/C	2,60	T/C	37,35	C/C	0,7	NA
Chr02	24818877	T	C	INTERGENIC	NA	T/T	6,0	T/C	2,64	T/C	33,33	C/C	0,5	NA
Chr02	24818957	G	A	INTERGENIC	NA	G/G	4,0	G/A	2,60	G/A	35,35	A/A	0,7	NA
Chr02	24818981	G	A	INTERGENIC	NA	G/G	6,0	G/A	3,59	G/A	36,34	A|A	0,6	NA
Chr02	24819039	G	C	INTERGENIC	NA	G/G	6,0	G/C	3,61	G/C	36,32	C/C	0,11	NA
Chr02	24819055	C	T	INTERGENIC	NA	C/C	6,0	C/T	2,60	C/T	37,35	T/T	0,12	NA
Chr02	24819089	A	G	INTERGENIC	NA	A/A	4,0	A/G	2,64	A/G	36,36	G|G	0,9	NA
Chr02	24819099	T	C	INTERGENIC	NA	T/T	4,0	T/C	2,62	T/C	34,36	C|C	0,10	NA
Chr02	24819158	G	T	INTERGENIC	NA	G/G	1,0	G/T	5,55	G/T	36,30	T/T	0,11	NA
Chr02	24819179	C	T	INTERGENIC	NA	C/C	1,0	C/T	3,63	C/T	40,28	T/T	0,9	NA
Chr02	24819213	C	G	INTERGENIC	NA	C/C	3,0	C/G	3,65	C/G	39,31	G/G	0,9	NA
Chr02	24819281	T	C	INTERGENIC	NA	T/T	6,0	T/C	3,63	T/C	39,33	C/C	0,10	NA
Chr02	24819327	G	T	INTERGENIC	NA	G/G	6,0	G/T	3,53	G/T	34,38	T/T	0,9	NA
Chr02	24819368	A	G	INTERGENIC	NA	A/A	2,0	A/G	3,55	A/G	38,32	G|G	0,12	NA
Chr02	24819371	A	G	INTERGENIC	NA	A/A	2,0	A/G	3,55	A/G	38,32	G|G	0,12	NA
Chr02	24819410	A	G	INTERGENIC	NA	A/A	1,0	A/G	3,49	A/G	31,37	G|G	0,9	NA
Chr02	24819534	A	T	INTERGENIC	NA	A/A	1,0	A/T	1,47	A/T	44,26	T/T	0,9	NA
Chr02	24819583	A	G	INTERGENIC	NA	A/A	3,0	A/G	1,45	A/G	34,26	G|G	0,9	NA
Chr02	24819619	T	G	INTERGENIC	NA	T/T	3,0	T/G	4,36	T/G	37,27	G|G	0,10	NA
Chr02	24819748	G	C	INTERGENIC	NA	G/G	2,0	G/C	3,51	G/C	31,37	C/C	1,9	NA
Chr02	24819899	T	C	INTERGENIC	NA	T/T	3,0	T/C	3,51	T/C	33,25	C/C	0,6	NA
Chr02	24819927	A	G	INTERGENIC	NA	A/A	1,0	A/G	2,56	A/G	30,26	G|G	0,5	NA
Chr02	24819943	G	T	INTERGENIC	NA	G/G	1,0	G/T	2,56	G/T	32,26	T|T	0,5	NA
Chr02	24819944	G	A	INTERGENIC	NA	G/G	1,0	G/A	2,56	G/A	32,26	A|A	0,5	NA
Chr02	24819955	T	G	INTERGENIC	NA	T/T	1,0	T/G	41,19	T/G	53,9	G|G	0,4	NA
Chr02	24819996	C	T	INTERGENIC	NA	C/C	2,0	C/T	3,43	C/T	29,29	T/T	0,9	NA
Chr02	24820194	A	G	INTERGENIC	NA	A/A	1,0	A/G	2,44	A/G	26,20	G|G	0,9	NA
Chr02	24820198	T	C	INTERGENIC	NA	T/T	1,0	T/C	2,44	T/C	26,20	C|C	0,8	NA
Chr02	24820218	A	G	INTERGENIC	NA	A/A	2,0	A/G	4,38	A/G	31,19	G|G	0,10	NA
Chr02	24820260	T	G	INTERGENIC	NA	T/T	3,0	T/G	1,45	T/G	27,27	G|G	0,8	NA
Chr02	24820273	T	C	INTERGENIC	NA	T/T	2,0	T/C	1,43	T/C	30,26	C|C	0,8	NA
Chr02	24820306	C	G	INTERGENIC	NA	C/C	2,0	G/G	0,54	C/G	34,30	G/G	0,4	NA
Chr02	24820336	C	T	INTERGENIC	NA	C/C	2,0	C/T	1,55	C/T	34,34	T|T	0,3	NA
Chr02	24820339	C	T	INTERGENIC	NA	C/C	3,0	C/T	1,55	C/T	35,33	T|T	0,3	NA
Chr02	24820349	A	G	INTERGENIC	NA	A/A	3,0	A/G	2,52	A/G	37,31	G|G	0,3	NA
Chr02	24820396	C	T	INTERGENIC	NA	C/C	3,0	C/T	4,54	C/T	37,29	T|T	0,2	NA
Chr02	24820406	C	T	INTERGENIC	NA	C/C	3,0	C/T	4,54	C/T	37,27	T|T	0,2	NA
Chr02	24820421	C	T	INTERGENIC	NA	C/C	3,0	C/T	4,56	C/T	35,27	T/T	0,2	NA
Chr02	24820433	T	G	INTERGENIC	NA	T/T	3,0	T/G	3,57	T/G	36,24	G|G	0,1	NA
Chr02	24820434	G	A	INTERGENIC	NA	G/G	3,0	G/A	28,32	G/A	49,13	A|A	0,1	NA
Chr02	24820453	G	A	INTERGENIC	NA	G/G	3,0	G/A	8,52	G/A	40,24	A/A	0,2	NA
Chr02	24820495	G	A	INTERGENIC	NA	G/G	1,0	G/A	7,53	G/A	38,28	A/A	0,3	NA
Chr02	24820638	A	G	INTERGENIC	NA	A/A	3,0	A/G	1,49	A/G	34,30	G|G	0,7	NA
Chr02	24820643	A	C	INTERGENIC	NA	A/A	3,0	A/C	1,49	A/C	29,31	C|C	0,7	NA
Chr02	24820644	A	G	INTERGENIC	NA	A/A	3,0	A/G	1,49	A/G	31,31	G|G	0,7	NA
Chr02	24820653	A	G	INTERGENIC	NA	A/A	3,0	A/G	1,49	A/G	27,31	G|G	0,7	NA
Chr02	24820689	A	G	INTERGENIC	NA	A/A	4,0	A/G	1,53	A/G	27,37	G/G	0,9	NA
[truncated: 122,201 more rows]
